# Supplementary material for: Multi-Locus Genome-Wide Association Studies Reveal Fruit Quality Hotspots in Peach Genome
Source: Front Plant Sci. 2021 Feb 25;12:644799. doi: 10.3389/fpls.2021.644799 (PMC7959719; doi:10.3389/fpls.2021.644799)
Supplement: Supplementary file 3 [file Table_1.xlsx]

## Sheet: S1_Table
Table S1. Description of 620 individuals from three public fresh market peach breeding programs (Arkansas, Texas and South Carolina).
Sample_ID	Parent1	Parent2	Classification	Location
A_657	Bradley	A_334	Advanced selection	AR
A_663	Bradley	A_334	Advanced selection	AR
A_665	A_371	A_367	Advanced selection	AR
A_672	A_405	A_419	Advanced selection	AR
A_699	-	-	Advanced selection	AR
A_708	-	-	Advanced selection	AR
A_716	Elberta	-	Advanced selection	AR
A_760	A_500	WhiteCounty	Advanced selection	AR
A_772	A_405	A_665	Advanced selection	AR
A_773	A_371	A_604	Advanced selection	AR
A_776	A_699	A_663	Advanced selection	AR
A_778	A_405	A_657	Advanced selection	AR
A_783	A_699	A_717	Advanced selection	AR
A_789	WhiteCounty	A_672	Advanced selection	AR
BY00P6346u	-	-	Advanced selection	SC
BY01P6245	Contender	Fla92-2C	Advanced selection	SC
BY92P2710	-	-	Advanced selection	SC
CAF2	-	-	Advanced selection	TX
CAF3	-	-	Advanced selection	TX
CAF4	-	-	Advanced selection	TX
TXW1293_1	-	-	Advanced selection	TX
TXW1490_1	-	-	Advanced selection	TX
TX2293_3	-	-	Advanced selection	TX
AmooreSweet	A_699	A_663	Cultivar	AR
Arrington	-	-	Cultivar	AR
Bradley	-	-	Cultivar	AR
Souvenirs	A_708	-	Cultivar	AR
Westbrook	-	-	Cultivar	AR
WhiteCounty	-	-	Cultivar	AR
WhiteRiver	Loring	NJ257	Cultivar	AR
Winblo	Redskin	F_Winblo	Cultivar	AR
Bolinha	-	-	Cultivar	SC
Jefferson	Elberta	-	Cultivar	SC
OrangeCling	-	-	Cultivar	SC
Autumnglo	-	-	Cultivar	SC
Biscoe	RaritanRose	Redskin	Cultivar	SC
Blazeprince	-	-	Cultivar	SC
Candor	Redhaven	ErlyRedFre	Cultivar	SC
Caroking	Loring	F_Caroking	Cultivar	SC
CarolinaGold	Biscoe	NC_C5S_067	Cultivar	SC
Challenger	Redhaven	RelxBis	Cultivar	SC
ChineseCling	-	-	Cultivar	SC
Clayton	Pekin	Candor	Cultivar	SC
Contender	Winblo	NC64	Cultivar	SC
CrimsonLady	RedDiamond	Springcrest	Cultivar	SC
EarlyCrawford	-	-	Cultivar	SC
Elberta	ChineseCling	LateCrawford	Cultivar	SC
Encore	NJ585414	Autumnglo	Cultivar	SC
ErlyRedFre	-	-	Cultivar	SC
Flordaprince	-	-	Cultivar	SC
GeorgiaBelle	ChineseCling	-	Cultivar	SC
Goldprince	Loring	-	Cultivar	SC
Hakuho	-	-	Cultivar	SC
Harvester	Redskin	SouthernGlow	Cultivar	SC
Intrepid	Redhaven	RelxBis	Cultivar	SC
JHHale	Elberta	Elberta	Cultivar	SC
LateCrawford	OrangeCling	EarlyCrawford	Cultivar	SC
Loring	-	-	Cultivar	SC
Lovell	StJohn	-	Cultivar	SC
OHenry	MerrillBon	Elberta	Cultivar	SC
RaritanRose	JHHale	-	Cultivar	SC
Redhaven	-	-	Cultivar	SC
Redskin	-	-	Cultivar	SC
Reliance	-	-	Cultivar	SC
Springprince	Springcrest	-	Cultivar	SC
Springtime	-	-	Cultivar	SC
StJohn	-	-	Cultivar	SC
ZinDai	Hakuho	F_ZinDai	Cultivar	SC
Galaxy	-	-	Cultivar	TX
TropicBeauty	Fla3-2	Flordaprince	Cultivar	TX
Wiser	-	-	Cultivar	AR
TX2B136	-	-	Cultivar	TX
AR_Pop_1_01	-	-	seedlings	AR
AR_Pop_1_02	-	-	seedlings	AR
AR_Pop_1_04	-	-	seedlings	AR
AR_Pop_1_05	-	-	seedlings	AR
AR_Pop_1_06	-	-	seedlings	AR
AR_Pop_1_07	-	-	seedlings	AR
AR_Pop_1_08	-	-	seedlings	AR
AR_Pop_1_09	-	-	seedlings	AR
AR_Pop_1_11	-	-	seedlings	AR
AR_Pop_1_12	-	-	seedlings	AR
AR_Pop_1_13	-	-	seedlings	AR
AR_Pop_1_14	-	-	seedlings	AR
AR_Pop_1_15	-	-	seedlings	AR
AR_Pop_1_16	-	-	seedlings	AR
AR_Pop_1_17	-	-	seedlings	AR
AR_Pop_1_18	-	-	seedlings	AR
AR_Pop_1_19	-	-	seedlings	AR
AR_Pop_1_20	-	-	seedlings	AR
AR_Pop_1_21	-	-	seedlings	AR
AR_Pop_1_22	-	-	seedlings	AR
AR_Pop_1_23	-	-	seedlings	AR
AR_Pop_1_24	-	-	seedlings	AR
AR_Pop_1_25	-	-	seedlings	AR
AR_Pop_1_26	-	-	seedlings	AR
AR_Pop_1_27	-	-	seedlings	AR
AR_Pop_1_28	-	-	seedlings	AR
AR_Pop_1_29	-	-	seedlings	AR
AR_Pop_1_31	-	-	seedlings	AR
AR_Pop_1_32	-	-	seedlings	AR
AR_Pop_1_33	-	-	seedlings	AR
AR_Pop_1_34	-	-	seedlings	AR
AR_Pop_1_35	-	-	seedlings	AR
AR_Pop_1_36	-	-	seedlings	AR
AR_Pop_1_37	-	-	seedlings	AR
AR_Pop_1_38	-	-	seedlings	AR
AR_Pop_1_39	-	-	seedlings	AR
AR_Pop_1_42	-	-	seedlings	AR
AR_Pop_1_43	-	-	seedlings	AR
AR_Pop_1_44	-	-	seedlings	AR
AR_Pop_1_45	-	-	seedlings	AR
AR_Pop_1_46	-	-	seedlings	AR
AR_Pop_1_47	-	-	seedlings	AR
AR_Pop_1_48	-	-	seedlings	AR
AR_Pop_1_49	-	-	seedlings	AR
AR_Pop0801_01	-	-	seedlings	AR
AR_Pop0801_02	-	-	seedlings	AR
AR_Pop0801_03	-	-	seedlings	AR
AR_Pop0801_04	-	-	seedlings	AR
AR_Pop0801_05	-	-	seedlings	AR
AR_Pop0801_06	-	-	seedlings	AR
AR_Pop0801_08	-	-	seedlings	AR
AR_Pop0801_09	-	-	seedlings	AR
AR_Pop0801_10	-	-	seedlings	AR
AR_Pop0801_11	-	-	seedlings	AR
AR_Pop0801_12	-	-	seedlings	AR
AR_Pop0801_13	-	-	seedlings	AR
AR_Pop0801_14	-	-	seedlings	AR
AR_Pop0801_15	-	-	seedlings	AR
AR_Pop0801_16	-	-	seedlings	AR
AR_Pop0803_02	-	-	seedlings	AR
AR_Pop0803_03	-	-	seedlings	AR
AR_Pop0803_04	-	-	seedlings	AR
AR_Pop0803_05	-	-	seedlings	AR
AR_Pop0803_07	-	-	seedlings	AR
AR_Pop0803_09	-	-	seedlings	AR
AR_Pop0803_10	-	-	seedlings	AR
AR_Pop0803_11	-	-	seedlings	AR
AR_Pop0803_12	-	-	seedlings	AR
AR_Pop0803_13	-	-	seedlings	AR
AR_Pop0803_14	-	-	seedlings	AR
AR_Pop0813_01	-	-	seedlings	AR
AR_Pop0813_02	-	-	seedlings	AR
AR_Pop0813_03	-	-	seedlings	AR
AR_Pop0813_04	-	-	seedlings	AR
AR_Pop0813_05	-	-	seedlings	AR
AR_Pop0813_07	-	-	seedlings	AR
AR_Pop0813_08	-	-	seedlings	AR
AR_Pop0813_09	-	-	seedlings	AR
AR_Pop0813_11	-	-	seedlings	AR
AR_Pop0813_12	-	-	seedlings	AR
AR_Pop0817_02	-	-	seedlings	AR
AR_Pop0819_01	-	-	seedlings	AR
AR_Pop0819_02	-	-	seedlings	AR
AR_Pop0819_03	-	-	seedlings	AR
AR_Pop0819_04	-	-	seedlings	AR
AR_Pop0819_05	-	-	seedlings	AR
AR_Pop0819_06	-	-	seedlings	AR
AR_Pop0819_07	-	-	seedlings	AR
AR_Pop0819_08	-	-	seedlings	AR
AR_Pop0819_09	-	-	seedlings	AR
AR_Pop0819_10	-	-	seedlings	AR
AR_Pop0819_11	-	-	seedlings	AR
AR_Pop0819_12	-	-	seedlings	AR
AR_Pop0819_13	-	-	seedlings	AR
AR_Pop0819_14	-	-	seedlings	AR
AR_Pop0819_16	-	-	seedlings	AR
AR_Pop0819_17	-	-	seedlings	AR
AR_Pop0819_18	-	-	seedlings	AR
AR_Pop0819_19	-	-	seedlings	AR
AR_Pop0819_21	-	-	seedlings	AR
AR_Pop0819_22	-	-	seedlings	AR
AR_Pop0819_23	-	-	seedlings	AR
AR_Pop0825_01	-	-	seedlings	AR
AR_Pop0825_02	-	-	seedlings	AR
AR_Pop0825_03	-	-	seedlings	AR
AR_Pop0825_04	-	-	seedlings	AR
AR_Pop0825_05	-	-	seedlings	AR
AR_Pop0825_06	-	-	seedlings	AR
AR_Pop0825_08	-	-	seedlings	AR
AR_Pop0825_09	-	-	seedlings	AR
AR_Pop0825_11	-	-	seedlings	AR
AR_Pop0825_12	-	-	seedlings	AR
AR_Pop0825_13	-	-	seedlings	AR
AR_Pop0825_14	-	-	seedlings	AR
AR_Pop0825_15	-	-	seedlings	AR
AR_Pop0825_16	-	-	seedlings	AR
AR_Pop0825_17	-	-	seedlings	AR
SC_Pop0804_001	-	-	Seedlings	SC
SC_Pop0804_002	-	-	Seedlings	SC
SC_Pop0804_003	-	-	Seedlings	SC
SC_Pop0804_004	-	-	Seedlings	SC
SC_Pop0804_005	-	-	Seedlings	SC
SC_Pop0804_006	-	-	Seedlings	SC
SC_Pop0804_007	-	-	Seedlings	SC
SC_Pop0804_008	-	-	Seedlings	SC
SC_Pop0804_009	-	-	Seedlings	SC
SC_Pop0804_010	-	-	Seedlings	SC
SC_Pop0804_011	-	-	Seedlings	SC
SC_Pop0804_012	-	-	Seedlings	SC
SC_Pop0804_013	-	-	Seedlings	SC
SC_Pop0804_014	-	-	Seedlings	SC
SC_Pop0804_016	-	-	Seedlings	SC
SC_Pop0804_017	-	-	Seedlings	SC
SC_Pop0804_018	-	-	Seedlings	SC
SC_Pop0804_019	-	-	Seedlings	SC
SC_Pop0804_020	-	-	Seedlings	SC
SC_Pop0806_003	-	-	Seedlings	SC
SC_Pop0806_009	-	-	Seedlings	SC
SC_Pop0807_012	-	-	Seedlings	SC
SC_Pop0809_001	-	-	Seedlings	SC
SC_Pop0809_003	-	-	Seedlings	SC
SC_Pop0809_004	-	-	Seedlings	SC
SC_Pop0809_007	-	-	Seedlings	SC
SC_Pop0809_009	-	-	Seedlings	SC
SC_Pop0809_011	-	-	Seedlings	SC
SC_Pop0809_012	-	-	Seedlings	SC
SC_Pop0809_014	-	-	Seedlings	SC
SC_Pop0809_015	-	-	Seedlings	SC
SC_Pop0809_016	-	-	Seedlings	SC
SC_Pop0809_017	-	-	Seedlings	SC
SC_Pop0809_018	-	-	Seedlings	SC
SC_Pop0809_019	-	-	Seedlings	SC
SC_Pop0809_021	-	-	Seedlings	SC
SC_Pop0809_022	-	-	Seedlings	SC
SC_Pop0809_023	-	-	Seedlings	SC
SC_Pop0809_024	-	-	Seedlings	SC
SC_Pop0809_025	-	-	Seedlings	SC
SC_Pop0809_026	-	-	Seedlings	SC
SC_Pop0809_028	-	-	Seedlings	SC
SC_Pop0809_030	-	-	Seedlings	SC
SC_Pop0809_031	-	-	Seedlings	SC
SC_Pop0809_032	-	-	Seedlings	SC
SC_Pop0814_001	-	-	Seedlings	SC
SC_Pop0814_002	-	-	Seedlings	SC
SC_Pop0814_003	-	-	Seedlings	SC
SC_Pop0815_001	-	-	Seedlings	SC
SC_Pop0815_002	-	-	Seedlings	SC
SC_Pop0815_003	-	-	Seedlings	SC
SC_Pop0817_001	-	-	Seedlings	SC
SC_Pop0817_007	-	-	Seedlings	SC
SC_Pop0817_009	-	-	Seedlings	SC
SC_Pop0817_015	-	-	Seedlings	SC
SC_Pop0817_018	-	-	Seedlings	SC
SC_Pop0817_024	-	-	Seedlings	SC
SC_Pop0817_033	-	-	Seedlings	SC
SC_Pop0817_038	-	-	Seedlings	SC
SC_Pop0817_039	-	-	Seedlings	SC
SC_Pop0817_040mx	-	-	Seedlings	SC
SC_Pop0817_041mx	-	-	Seedlings	SC
SC_Pop0817_043mx	-	-	Seedlings	SC
SC_Pop0817_055	-	-	Seedlings	SC
SC_Pop0817_056	-	-	Seedlings	SC
SC_Pop0817_057	-	-	Seedlings	SC
SC_Pop0817_061	-	-	Seedlings	SC
SC_Pop0817_075	-	-	Seedlings	SC
SC_Pop0817_083	-	-	Seedlings	SC
SC_Pop0817_095	-	-	Seedlings	SC
SC_Pop0819_023	-	-	Seedlings	SC
SC_Pop0819_024	-	-	Seedlings	SC
SC_Pop0819_025	-	-	Seedlings	SC
SC_Pop0819_027	-	-	Seedlings	SC
SC_Pop0819_028	-	-	Seedlings	SC
SC_Pop0819_029	-	-	Seedlings	SC
SC_Pop0819_030	-	-	Seedlings	SC
SC_Pop0819_031	-	-	Seedlings	SC
SC_Pop0819_032	-	-	Seedlings	SC
SC_Pop0819_033	-	-	Seedlings	SC
SC_Pop0819_034	-	-	Seedlings	SC
SC_Pop0819_035	-	-	Seedlings	SC
SC_Pop0819_036	-	-	Seedlings	SC
SC_Pop0819_037	-	-	Seedlings	SC
SC_Pop0819_038	-	-	Seedlings	SC
SC_Pop0819_039	-	-	Seedlings	SC
SC_Pop0821_001	-	-	Seedlings	SC
SC_Pop0821_002	-	-	Seedlings	SC
SC_Pop0821_003	-	-	Seedlings	SC
SC_Pop0821_004	-	-	Seedlings	SC
SC_Pop0821_005	-	-	Seedlings	SC
SC_Pop0821_006	-	-	Seedlings	SC
SC_Pop0821_008	-	-	Seedlings	SC
SC_Pop0821_009	-	-	Seedlings	SC
SC_Pop0821_010	-	-	Seedlings	SC
SC_Pop0821_011	-	-	Seedlings	SC
SC_Pop0821_012	-	-	Seedlings	SC
SC_Pop0821_013	-	-	Seedlings	SC
SC_Pop0821_014	-	-	Seedlings	SC
SC_Pop0821_015	-	-	Seedlings	SC
SC_Pop0821_016	-	-	Seedlings	SC
SC_Pop0821_017	-	-	Seedlings	SC
SC_Pop0821_018	-	-	Seedlings	SC
SC_Pop0821_019	-	-	Seedlings	SC
SC_Pop0821_020	-	-	Seedlings	SC
SC_Pop0823_004	-	-	Seedlings	SC
SC_Pop0823_005	-	-	Seedlings	SC
SC_Pop0823_006	-	-	Seedlings	SC
SC_Pop0823_007	-	-	Seedlings	SC
SC_Pop0823_008	-	-	Seedlings	SC
SC_Pop0823_009	-	-	Seedlings	SC
SC_Pop0823_010	-	-	Seedlings	SC
SC_Pop0823_011	-	-	Seedlings	SC
SC_Pop0823_012	-	-	Seedlings	SC
SC_Pop0823_013	-	-	Seedlings	SC
SC_Pop0823_014	-	-	Seedlings	SC
SC_Pop0823_015	-	-	Seedlings	SC
SC_Pop0823_017	-	-	Seedlings	SC
SC_Pop0823_019	-	-	Seedlings	SC
SC_Pop0823_020	-	-	Seedlings	SC
SC_Pop0823_068	-	-	Seedlings	SC
SC_Pop0823_071	-	-	Seedlings	SC
SC_Pop0823_074	-	-	Seedlings	SC
SC_Pop0823_075	-	-	Seedlings	SC
SC_Pop0823_077	-	-	Seedlings	SC
SC_Pop0823_078	-	-	Seedlings	SC
SC_Pop0823_086	-	-	Seedlings	SC
SC_Pop0824_001	-	-	Seedlings	SC
SC_Pop0824_003	-	-	Seedlings	SC
SC_Pop0824_006	-	-	Seedlings	SC
SC_Pop0824_007	-	-	Seedlings	SC
SC_Pop0824_008	-	-	Seedlings	SC
SC_Pop0824_013	-	-	Seedlings	SC
SC_Pop0824_014	-	-	Seedlings	SC
SC_Pop0824_015	-	-	Seedlings	SC
SC_Pop0824_016	-	-	Seedlings	SC
SC_Pop0824_018	-	-	Seedlings	SC
SC_Pop0824_019	-	-	Seedlings	SC
SC_Pop0824_020	-	-	Seedlings	SC
SC_Pop0824_021	-	-	Seedlings	SC
SC_Pop0824_022	-	-	Seedlings	SC
SC_Pop0825_001	-	-	Seedlings	SC
SC_Pop0825_002	-	-	Seedlings	SC
SC_Pop0825_003	-	-	Seedlings	SC
SC_Pop0825_004	-	-	Seedlings	SC
SC_Pop0825_006	-	-	Seedlings	SC
SC_Pop0825_007	-	-	Seedlings	SC
SC_Pop0825_009	-	-	Seedlings	SC
SC_Pop0825_010	-	-	Seedlings	SC
SC_Pop0825_011	-	-	Seedlings	SC
SC_Pop0825_012	-	-	Seedlings	SC
SC_Pop0825_013	-	-	Seedlings	SC
SC_Pop0825_014	-	-	Seedlings	SC
SC_Pop0825_016	-	-	Seedlings	SC
SC_Pop0825_017	-	-	Seedlings	SC
SC_Pop0825_019	-	-	Seedlings	SC
SC_Pop0825_020	-	-	Seedlings	SC
SC_Pop0825_021	-	-	Seedlings	SC
SC_Pop0825_022	-	-	Seedlings	SC
SC_Pop0825_023	-	-	Seedlings	SC
SC_Pop0826_001	-	-	Seedlings	SC
SC_Pop0826_002	-	-	Seedlings	SC
SC_Pop0826_003	-	-	Seedlings	SC
SC_Pop0826_004	-	-	Seedlings	SC
SC_Pop0826_005	-	-	Seedlings	SC
SC_Pop0826_007	-	-	Seedlings	SC
SC_Pop0826_008	-	-	Seedlings	SC
SC_Pop0826_009	-	-	Seedlings	SC
SC_Pop0826_010	-	-	Seedlings	SC
SC_Pop0826_011	-	-	Seedlings	SC
SC_Pop0826_012	-	-	Seedlings	SC
SC_Pop0828_015	-	-	Seedlings	SC
SC_Pop0828_018	-	-	Seedlings	SC
SC_Pop0829_009	-	-	Seedlings	SC
SC_Pop0836_001	-	-	Seedlings	SC
SC_Pop0836_002	-	-	Seedlings	SC
SC_Pop0836_004	-	-	Seedlings	SC
SC_Pop0836_005	-	-	Seedlings	SC
SC_Pop0836_006	-	-	Seedlings	SC
SC_Pop0836_007	-	-	Seedlings	SC
SC_Pop1_A008	-	-	Seedlings	SC
SC_Pop1_A028	-	-	Seedlings	SC
SC_Pop1_A033	-	-	Seedlings	SC
SC_Pop1_A042	-	-	Seedlings	SC
SC_Pop1_A050	-	-	Seedlings	SC
SC_Pop1_A057	-	-	Seedlings	SC
SC_Pop1_A058	-	-	Seedlings	SC
SC_Pop1_A069	-	-	Seedlings	SC
SC_Pop1_A073	-	-	Seedlings	SC
SC_Pop1_A075	-	-	Seedlings	SC
SC_Pop1_A082	-	-	Seedlings	SC
SC_Pop1_A095	-	-	Seedlings	SC
SC_Pop1_A098	-	-	Seedlings	SC
SC_Pop1_A100	-	-	Seedlings	SC
SC_Pop1_A104	-	-	Seedlings	SC
SC_Pop1_A107	-	-	Seedlings	SC
SC_Pop1_A110	-	-	Seedlings	SC
SC_Pop1_A111	-	-	Seedlings	SC
SC_Pop1_A113	-	-	Seedlings	SC
SC_Pop1_A115	-	-	Seedlings	SC
SC_Pop1_A121	-	-	Seedlings	SC
SC_Pop1_A122	-	-	Seedlings	SC
SC_Pop1_A123	-	-	Seedlings	SC
SC_Pop1_A124	-	-	Seedlings	SC
SC_Pop1_A126	-	-	Seedlings	SC
SC_Pop1_A127	-	-	Seedlings	SC
SC_Pop1_A128	-	-	Seedlings	SC
SC_Pop1_A129	-	-	Seedlings	SC
SC_Pop1_A130	-	-	Seedlings	SC
SC_Pop1_A132	-	-	Seedlings	SC
SC_Pop1_A133	-	-	Seedlings	SC
SC_Pop1_A135	-	-	Seedlings	SC
SC_Pop1_A136	-	-	Seedlings	SC
SC_Pop1_A137	-	-	Seedlings	SC
SC_Pop1_A138	-	-	Seedlings	SC
SC_Pop1_A140	-	-	Seedlings	SC
SC_Pop1_A141	-	-	Seedlings	SC
SC_Pop1_A145	-	-	Seedlings	SC
SC_Pop1_A146	-	-	Seedlings	SC
SC_Pop1_A147	-	-	Seedlings	SC
SC_Pop1_A148	-	-	Seedlings	SC
SC_Pop1_A153	-	-	Seedlings	SC
SC_Pop1_A154	-	-	Seedlings	SC
SC_Pop1_A163	-	-	Seedlings	SC
SC_Pop1_A169	-	-	Seedlings	SC
SC_Pop1_A171	-	-	Seedlings	SC
SC_Pop1_A173	-	-	Seedlings	SC
SC_Pop1_A178	-	-	Seedlings	SC
SC_Pop1_A180	-	-	Seedlings	SC
SC_Pop1_A181	-	-	Seedlings	SC
SC_Pop1_A185	-	-	Seedlings	SC
SC_Pop1_A187	-	-	Seedlings	SC
SC_Pop1_A190	-	-	Seedlings	SC
SC_Pop1_A192	-	-	Seedlings	SC
SC_Pop1_B012	-	-	Seedlings	SC
SC_Pop1_B031	-	-	Seedlings	SC
SC_Pop1_B076	-	-	Seedlings	SC
SC_Pop1_B077	-	-	Seedlings	SC
SC_Pop1_B089	-	-	Seedlings	SC
SC_Pop1_B092	-	-	Seedlings	SC
SC_Pop1_B097	-	-	Seedlings	SC
SC_Pop1_B152	-	-	Seedlings	SC
SC_Pop2_A037QK	-	-	Seedlings	SC
SC_Pop2_A038RM	-	-	Seedlings	SC
SC_Pop2_A050DE	-	-	Seedlings	SC
SC_Pop2_A053GH	-	-	Seedlings	SC
SC_Pop2_A059PQ	-	-	Seedlings	SC
SC_Pop2_A082PK	-	-	Seedlings	SC
SC_Pop2_A142DG	-	-	Seedlings	SC
SC_Pop2_A163BK	-	-	Seedlings	SC
SC_Pop2_A170JH	-	-	Seedlings	SC
SC_Pop2_A176RQ	-	-	Seedlings	SC
SC_Pop2_A209BM	-	-	Seedlings	SC
SC_Pop2_A216JJ	-	-	Seedlings	SC
SC_Pop2_A218MM	-	-	Seedlings	SC
SC_Pop2_A228XN	-	-	Seedlings	SC
SC_Pop2_A242NH	-	-	Seedlings	SC
SC_Pop2_A248UQ	-	-	Seedlings	SC
SC_Pop2_A258ER	-	-	Seedlings	SC
SC_Pop2_A281EM	-	-	Seedlings	SC
SC_Pop2_A294UR	-	-	Seedlings	SC
SC_Pop2_A304EG	-	-	Seedlings	SC
SC_Pop2_A305FH	-	-	Seedlings	SC
SC_Pop2_A323AH	-	-	Seedlings	SC
SC_PopB_1549	-	-	Seedlings	SC
SC_PopB_1550	-	-	Seedlings	SC
SC_PopB_1551	-	-	Seedlings	SC
SC_PopB_1554	-	-	Seedlings	SC
SC_PopB_1555	-	-	Seedlings	SC
SC_PopB_1556	-	-	Seedlings	SC
SC_PopB_1568	-	-	Seedlings	SC
SC_PopB_1578	-	-	Seedlings	SC
SC_PopB_1599	-	-	Seedlings	SC
SC_PopB_1600	-	-	Seedlings	SC
SC_PopB_1601	-	-	Seedlings	SC
SC_PopB_1602	-	-	Seedlings	SC
SC_PopB_1604	-	-	Seedlings	SC
SC_PopB_1605	-	-	Seedlings	SC
SC_PopB_1606	-	-	Seedlings	SC
SC_PopB_1615	-	-	Seedlings	SC
SC_PopB_1616	-	-	Seedlings	SC
SC_PopB_1617	-	-	Seedlings	SC
SC_PopB_1618	-	-	Seedlings	SC
SC_PopB_1621	-	-	Seedlings	SC
SC_PopB_1622	-	-	Seedlings	SC
SC_PopB_1623	-	-	Seedlings	SC
SC_PopB_1624	-	-	Seedlings	SC
SC_PopB_1634	-	-	Seedlings	SC
TX_Pop1_03	-	-	Seedlings	TX
TX_Pop1_04	-	-	Seedlings	TX
TX_Pop1_05	-	-	Seedlings	TX
TX_Pop1_06	-	-	Seedlings	TX
TX_Pop1_07	-	-	Seedlings	TX
TX_Pop1_08	-	-	Seedlings	TX
TX_Pop1_09	-	-	Seedlings	TX
TX_Pop1_10	-	-	Seedlings	TX
TX_Pop1_11	-	-	Seedlings	TX
TX_Pop1_12	-	-	Seedlings	TX
TX_Pop1_13	-	-	Seedlings	TX
TX_Pop1_14	-	-	Seedlings	TX
TX_Pop1_15	-	-	Seedlings	TX
TX_Pop1_16	-	-	Seedlings	TX
TX_Pop1_17	-	-	Seedlings	TX
TX_Pop1_18	-	-	Seedlings	TX
TX_Pop1_20	-	-	Seedlings	TX
TX_Pop1_25	-	-	Seedlings	TX
TX_Pop1_27	-	-	Seedlings	TX
TX_Pop1_28	-	-	Seedlings	TX
TX_Pop1_31	-	-	Seedlings	TX
TX_Pop1_32	-	-	Seedlings	TX
TX_Pop1_35	-	-	Seedlings	TX
TX_Pop1_37	-	-	Seedlings	TX
TX_Pop1_38	-	-	Seedlings	TX
TX_Pop1_39	-	-	Seedlings	TX
TX_Pop1_40	-	-	Seedlings	TX
TX_Pop2_01	-	-	Seedlings	TX
TX_Pop2_02	-	-	Seedlings	TX
TX_Pop2_03	-	-	Seedlings	TX
TX_Pop2_04	-	-	Seedlings	TX
TX_Pop2_07	-	-	Seedlings	TX
TX_Pop2_08	-	-	Seedlings	TX
TX_Pop2_09	-	-	Seedlings	TX
TX_Pop2_10	-	-	Seedlings	TX
TX_Pop2_11	-	-	Seedlings	TX
TX_Pop2_12	-	-	Seedlings	TX
TX_Pop2_13	-	-	Seedlings	TX
TX_Pop2_14	-	-	Seedlings	TX
TX_Pop2_15	-	-	Seedlings	TX
TX_Pop2_16	-	-	Seedlings	TX
TX_Pop2_17	-	-	Seedlings	TX
TX_Pop2_18	-	-	Seedlings	TX
TX_Pop2_19	-	-	Seedlings	TX
TX_Pop2_21	-	-	Seedlings	TX
TX_Pop2_22	-	-	Seedlings	TX
TX_Pop3_01	-	-	Seedlings	TX
TX_Pop3_02	-	-	Seedlings	TX
TX_Pop3_03	-	-	Seedlings	TX
TX_Pop3_04	-	-	Seedlings	TX
TX_Pop3_05	-	-	Seedlings	TX
TX_Pop3_06	-	-	Seedlings	TX
TX_Pop3_07	-	-	Seedlings	TX
TX_Pop3_08	-	-	Seedlings	TX
TX_Pop3_10	-	-	Seedlings	TX
TX_Pop3_11	-	-	Seedlings	TX
TX_Pop3_12	-	-	Seedlings	TX
TX_Pop3_13	-	-	Seedlings	TX
TX_Pop3_14	-	-	Seedlings	TX
TX_Pop3_15	-	-	Seedlings	TX
TX_Pop3_16	-	-	Seedlings	TX
TX_Pop3_17	-	-	Seedlings	TX
TX_Pop3_18	-	-	Seedlings	TX
TX_Pop3_19	-	-	Seedlings	TX
TX_Pop3_20	-	-	Seedlings	TX
TX_Pop3_21	-	-	Seedlings	TX
TX_Pop3_22	-	-	Seedlings	TX
TX_Pop3_23	-	-	Seedlings	TX
TX_Pop3_24	-	-	Seedlings	TX
TX_Pop3_25	-	-	Seedlings	TX
TX_Pop3_26	-	-	Seedlings	TX
TX_Pop3_27	-	-	Seedlings	TX
TX_Pop3_28	-	-	Seedlings	TX
TX_Pop3_29	-	-	Seedlings	TX
TX_Pop3_30	-	-	Seedlings	TX
TX_Pop3_31	-	-	Seedlings	TX
TX_Pop3_32	-	-	Seedlings	TX
TX_Pop3_33	-	-	Seedlings	TX
TX_Pop3_34	-	-	Seedlings	TX
TX_Pop3_36	-	-	Seedlings	TX
TX_Pop3_37	-	-	Seedlings	TX
TX_Pop3_38	-	-	Seedlings	TX
TX_Pop4_06	-	-	Seedlings	TX
TX_Pop4_07	-	-	Seedlings	TX
TX_Pop4_09	-	-	Seedlings	TX
TX_Pop4_10	-	-	Seedlings	TX
TX_Pop4_11	-	-	Seedlings	TX
TX_Pop4_15	-	-	Seedlings	TX
TX_Pop4_17	-	-	Seedlings	TX
TX_Pop4_18	-	-	Seedlings	TX
TX_Pop4_22	-	-	Seedlings	TX
TX_Pop4_23	-	-	Seedlings	TX
TX_Pop4_24	-	-	Seedlings	TX
TX_Pop4_25	-	-	Seedlings	TX
TX_Pop4_26	-	-	Seedlings	TX
TX_Pop4_29	-	-	Seedlings	TX
TX_Pop4_30	-	-	Seedlings	TX
TX_Pop6_01	-	-	Seedlings	TX
TX_Pop6_02	-	-	Seedlings	TX
TX_Pop6_04	-	-	Seedlings	TX
TX_Pop6_05	-	-	Seedlings	TX
TX_Pop6_06	-	-	Seedlings	TX
TX_Pop6_07	-	-	Seedlings	TX
TX_Pop6_08	-	-	Seedlings	TX
TX_Pop6_09	-	-	Seedlings	TX
TX_Pop6_10	-	-	Seedlings	TX
TX_Pop6_11	-	-	Seedlings	TX
TX_Pop6_18	-	-	Seedlings	TX
TX_Pop6_21	-	-	Seedlings	TX
TX_Pop6_23	-	-	Seedlings	TX
TX_Pop6_25	-	-	Seedlings	TX
TX_Pop6_26	-	-	Seedlings	TX
TX_Pop6_28	-	-	Seedlings	TX
TX_Pop6_29	-	-	Seedlings	TX
TX_Pop6_31	-	-	Seedlings	TX
TX_Pop6_32	-	-	Seedlings	TX
TX_Pop6_33	-	-	Seedlings	TX
TX_Pop6_34	-	-	Seedlings	TX
TX_Pop6_36	-	-	Seedlings	TX
TX_Pop8_02	-	-	Seedlings	TX
TX_Pop8_03	-	-	Seedlings	TX
TX_Pop8_04	-	-	Seedlings	TX
TX_Pop8_05	-	-	Seedlings	TX
TX_Pop8_06	-	-	Seedlings	TX
TX_Pop8_07	-	-	Seedlings	TX
TX_Pop8_08	-	-	Seedlings	TX
TX_Pop8_09	-	-	Seedlings	TX
TX_Pop8_10	-	-	Seedlings	TX
TX_Pop8_13	-	-	Seedlings	TX
TX_Pop8_17	-	-	Seedlings	TX
TX_Pop8_18	-	-	Seedlings	TX
TX_Pop8_19	-	-	Seedlings	TX
TX_Pop8_20	-	-	Seedlings	TX
TX_Pop8_26	-	-	Seedlings	TX
TX_Pop8_27	-	-	Seedlings	TX
TX_Pop9_01	-	-	Seedlings	TX
TX_Pop9_02	-	-	Seedlings	TX
TX_Pop9_03	-	-	Seedlings	TX
TX_Pop9_04	-	-	Seedlings	TX
TX_Pop9_05	-	-	Seedlings	TX
TX_Pop9_06	-	-	Seedlings	TX
TX_Pop9_07	-	-	Seedlings	TX
TX_Pop9_08	-	-	Seedlings	TX

## Sheet: S2_Table
Table S2. Description of SNP markers used in the study.
SNP_Name	chrom	pos (bp)
SNP_IGA_679	1	94644
SNP_IGA_1003	1	149550
SNP_IGA_1103	1	186181
SNP_IGA_1129	1	209701
SNP_IGA_1455	1	365032
SNP_IGA_2006	1	635137
SNP_IGA_2056	1	639476
SNP_IGA_2061	1	640894
SNP_IGA_2651	1	883576
SNP_IGA_2670	1	894020
SNP_IGA_2742	1	910113
SNP_IGA_2791	1	917314
SNP_IGA_2832	1	922264
SNP_IGA_2932	1	948415
SNP_IGA_2938	1	949162
SNP_IGA_3108	1	1075441
SNP_IGA_3717	1	1285400
SNP_IGA_3770	1	1289897
SNP_IGA_3800	1	1292751
SNP_IGA_3806	1	1293726
SNP_IGA_3859	1	1303168
SNP_IGA_3866	1	1305011
SNP_IGA_3931	1	1335246
SNP_IGA_4008	1	1364569
SNP_IGA_4137	1	1410204
SNP_IGA_4435	1	1479828
SNP_IGA_4544	1	1503780
SNP_IGA_4610	1	1538862
SNP_IGA_4808	1	1656910
SNP_IGA_4906	1	1695984
SNP_IGA_5258	1	1777788
SNP_IGA_5278	1	1780975
SNP_IGA_5675	1	1845444
SNP_IGA_5726	1	1883585
SNP_IGA_5891	1	1956920
SNP_IGA_6055	1	2005484
SNP_IGA_6633	1	2127675
SNP_IGA_6796	1	2145319
SNP_IGA_6853	1	2167920
SNP_IGA_6972	1	2177793
SNP_IGA_7066	1	2194983
SNP_IGA_7119	1	2231729
SNP_IGA_7524	1	2335065
SNP_IGA_7706	1	2375637
SNP_IGA_7738	1	2388475
SNP_IGA_7895	1	2458924
SNP_IGA_7992	1	2518043
SNP_IGA_8257	1	2633450
SNP_IGA_8948	1	2829979
SNP_IGA_9197	1	2965472
SNP_IGA_9580	1	3095892
SNP_IGA_9695	1	3121768
SNP_IGA_9745	1	3134752
SNP_IGA_10171	1	3318869
SNP_IGA_10361	1	3391266
SNP_IGA_10520	1	3433078
SNP_IGA_10635	1	3515828
SNP_IGA_10658	1	3519019
SNP_IGA_10702	1	3525907
SNP_IGA_10792	1	3563475
SNP_IGA_10938	1	3609869
SNP_IGA_11094	1	3659780
SNP_IGA_11106	1	3660418
SNP_IGA_11130	1	3678347
SNP_IGA_11879	1	3846620
SNP_IGA_12214	1	3979931
SNP_IGA_12367	1	4043111
SNP_IGA_12402	1	4047466
SNP_IGA_12519	1	4062238
SNP_IGA_13689	1	4308915
SNP_IGA_16897	1	4524835
SNP_IGA_16101	1	4837621
SNP_IGA_15977	1	4881766
SNP_IGA_15539	1	4998752
SNP_IGA_15268	1	5090296
SNP_IGA_14813	1	5248199
SNP_IGA_14438	1	5418830
Pp20Cl	1	5483781
SNP_IGA_435668	1	5595695
SNP_IGA_435720	1	5607744
SNP_IGA_436092	1	5840862
SNP_IGA_17419	1	6000280
SNP_IGA_17833	1	6252790
SNP_IGA_18074	1	6334696
SNP_IGA_18927	1	6709282
SNP_IGA_19393	1	6861098
SNP_IGA_19514	1	6872054
SNP_IGA_19818	1	6951668
SNP_IGA_22603	1	7949418
SNP_IGA_23251	1	8229667
SNP_IGA_23357	1	8251862
SNP_IGA_23453	1	8293842
SNP_IGA_23476	1	8299133
SNP_IGA_23572	1	8333988
SNP_IGA_24260	1	8806675
SNP_IGA_24318	1	8869657
SNP_IGA_24481	1	8934939
SNP_IGA_24703	1	8983056
SNP_IGA_24812	1	9003392
SNP_IGA_24980	1	9043794
SNP_IGA_25435	1	9270728
SNP_IGA_25530	1	9313048
SNP_IGA_26053	1	9476056
SNP_IGA_26500	1	9708199
SNP_IGA_26796	1	9842227
SNP_IGA_26876	1	9860838
SNP_IGA_27852	1	10329034
SNP_IGA_28066	1	10377404
SNP_IGA_28112	1	10388329
SNP_IGA_28130	1	10399077
SNP_IGA_28275	1	10515971
SNP_IGA_28294	1	10521046
SNP_IGA_28465	1	10625804
SNP_IGA_29009	1	11087699
SNP_IGA_29904	1	11571929
SNP_IGA_29920	1	11579018
SNP_IGA_30043	1	11652991
SNP_IGA_30092	1	11696757
SNP_IGA_30620	1	11944696
Pp9Cl	1	12037320
SNP_IGA_31001	1	12095424
SNP_IGA_31072	1	12105194
SNP_IGA_31108	1	12111150
SNP_IGA_31469	1	12156747
SNP_IGA_31646	1	12187249
SNP_IGA_31721	1	12195634
Pp15Cl	1	12212915
SNP_IGA_32535	1	12259009
SNP_IGA_32548	1	12260754
SNP_IGA_32705	1	12283035
SNP_IGA_33253	1	12342177
SNP_IGA_34297	1	12462382
SNP_IGA_34306	1	12463210
SNP_IGA_34709	1	12522351
SNP_IGA_34964	1	12540802
SNP_IGA_34985	1	12542607
SNP_IGA_35020	1	12546354
SNP_IGA_35067	1	12548547
SNP_IGA_35442	1	12604264
SNP_IGA_35586	1	12624018
SNP_IGA_35681	1	12639875
SNP_IGA_36109	1	12697843
SNP_IGA_36555	1	12739844
SNP_IGA_36595	1	12741848
SNP_IGA_36653	1	12746338
SNP_IGA_36663	1	12747180
SNP_IGA_36893	1	12772570
SNP_IGA_36898	1	12772973
SNP_IGA_36903	1	12773117
SNP_IGA_36910	1	12773896
SNP_IGA_36973	1	12796276
SNP_IGA_37531	1	12986035
SNP_IGA_37651	1	13039894
SNP_IGA_37664	1	13042093
SNP_IGA_37843	1	13089667
SNP_IGA_37907	1	13099606
SNP_IGA_38020	1	13114877
SNP_IGA_38273	1	13134250
SNP_IGA_38386	1	13139965
SNP_IGA_38403	1	13140767
SNP_IGA_38730	1	13194171
SNP_IGA_38736	1	13194686
SNP_IGA_38748	1	13195557
SNP_IGA_38752	1	13196672
SNP_IGA_38953	1	13215987
SNP_IGA_38958	1	13216159
SNP_IGA_38971	1	13217563
SNP_IGA_38993	1	13218759
SNP_IGA_39104	1	13245758
SNP_IGA_39717	1	13367604
SNP_IGA_40030	1	13410436
SNP_IGA_40295	1	13459887
SNP_IGA_40342	1	13496531
SNP_IGA_40406	1	13527092
SNP_IGA_918311	1	13600477
SNP_IGA_919869	1	13801919
SNP_IGA_40766	1	14135941
SNP_IGA_44068	1	15035403
SNP_IGA_46594	1	15902936
SNP_IGA_46754	1	15954607
SNP_IGA_46773	1	15955575
SNP_IGA_46788	1	15955789
SNP_IGA_47540	1	16033911
SNP_IGA_47595	1	16049459
SNP_IGA_47604	1	16051074
SNP_IGA_48586	1	16208688
SNP_IGA_53531	1	16724584
snp_1_15750387	1	16724688
SNP_IGA_54631	1	16818822
SNP_IGA_54637	1	16819054
SNP_IGA_55903	1	16864858
SNP_IGA_55908	1	16865293
SNP_IGA_55918	1	16865873
SNP_IGA_55923	1	16865968
SNP_IGA_56020	1	16872251
SNP_IGA_56163	1	16881328
SNP_IGA_56198	1	16883300
SNP_IGA_56436	1	16930541
SNP_IGA_57051	1	17160475
SNP_IGA_57241	1	17176561
SNP_IGA_57544	1	17363365
SNP_IGA_57793	1	17400346
SNP_IGA_58626	1	17538855
SNP_IGA_60299	1	18149172
SNP_IGA_60323	1	18150079
SNP_IGA_63603	1	19534781
SNP_IGA_63638	1	19545904
SNP_IGA_63746	1	19572604
SNP_IGA_63776	1	19577554
SNP_IGA_65286	1	19885574
SNP_IGA_65694	1	20053342
SNP_IGA_66456	1	20118826
SNP_IGA_66839	1	20156342
SNP_IGA_66864	1	20159845
SNP_IGA_67137	1	20219128
SNP_IGA_67265	1	20223302
SNP_IGA_67270	1	20223483
SNP_IGA_67620	1	20287777
SNP_IGA_78367	1	23079765
SNP_IGA_78954	1	23305178
SNP_IGA_79455	1	23529157
SNP_IGA_79719	1	23633569
SNP_IGA_79809	1	23701878
SNP_IGA_81682	1	24326549
SNP_IGA_84324	1	25482112
SNP_IGA_84580	1	25541717
SNP_IGA_86483	1	26444910
SNP_IGA_86925	1	26618897
SNP_IGA_86968	1	26640558
SNP_IGA_87433	1	26783135
SNP_IGA_87572	1	26826305
SNP_IGA_87577	1	26826779
SNP_IGA_87659	1	26844366
SNP_IGA_87668	1	26844762
SNP_IGA_87674	1	26845072
SNP_IGA_87680	1	26845167
SNP_IGA_87685	1	26845346
SNP_IGA_87689	1	26845540
SNP_IGA_87695	1	26845894
SNP_IGA_88028	1	26891721
SNP_IGA_88046	1	26896332
SNP_IGA_88751	1	27057490
SNP_IGA_89105	1	27194372
SNP_IGA_89193	1	27244316
SNP_IGA_89532	1	27308913
SNP_IGA_89808	1	27372935
SNP_IGA_90213	1	27454128
SNP_IGA_91050	1	27770607
SNP_IGA_91252	1	27839074
SNP_IGA_92138	1	28125395
Pp7Cl	1	28184376
SNP_IGA_92681	1	28333574
snp_1_27368782	1	28343393
SNP_IGA_93479	1	28598649
SNP_IGA_93589	1	28626343
SNP_IGA_93768	1	28690524
SNP_IGA_94887	1	29116355
SNP_IGA_95095	1	29248221
SNP_IGA_95375	1	29319919
SNP_IGA_95389	1	29321009
SNP_IGA_95412	1	29324635
SNP_IGA_95417	1	29325021
SNP_IGA_95421	1	29325144
SNP_IGA_95426	1	29325494
SNP_IGA_95715	1	29395166
SNP_IGA_96046	1	29508091
SNP_IGA_96088	1	29514558
SNP_IGA_96144	1	29521244
SNP_IGA_96172	1	29525628
SNP_IGA_96232	1	29557834
SNP_IGA_96539	1	29636040
SNP_IGA_96544	1	29637780
SNP_IGA_96555	1	29651327
SNP_IGA_97128	1	29873217
SNP_IGA_97245	1	29997078
SNP_IGA_97257	1	29998225
SNP_IGA_97351	1	30058294
SNP_IGA_97637	1	30263221
SNP_IGA_97747	1	30288603
SNP_IGA_97802	1	30314738
SNP_IGA_97931	1	30377401
SNP_IGA_98042	1	30427190
SNP_IGA_98170	1	30490945
SNP_IGA_98340	1	30569343
SNP_IGA_98623	1	30644296
SNP_IGA_98960	1	30788988
SNP_IGA_99110	1	30864365
SNP_IGA_99943	1	31269248
SNP_IGA_100353	1	31575640
SNP_IGA_101065	1	32136433
SNP_IGA_101106	1	32179338
SNP_IGA_101331	1	32331125
SNP_IGA_101451	1	32425512
SNP_IGA_101467	1	32433702
SNP_IGA_101476	1	32444016
SNP_IGA_101507	1	32457421
SNP_IGA_101538	1	32479670
SNP_IGA_101751	1	32516332
SNP_IGA_101845	1	32636134
SNP_IGA_102335	1	32843748
SNP_IGA_102464	1	32887700
SNP_IGA_102577	1	32957010
SNP_IGA_102807	1	33042500
SNP_IGA_102819	1	33048038
SNP_IGA_103381	1	33510762
SNP_IGA_103422	1	33531389
SNP_IGA_103507	1	33608365
SNP_IGA_103712	1	33707632
SNP_IGA_103771	1	33744976
SNP_IGA_103900	1	33780559
SNP_IGA_103917	1	33794212
SNP_IGA_103965	1	33848509
SNP_IGA_104030	1	33894567
SNP_IGA_104108	1	33933159
SNP_IGA_104167	1	33984643
SNP_IGA_104180	1	33989703
SNP_IGA_104324	1	34079472
SNP_IGA_104332	1	34080812
SNP_IGA_104455	1	34122904
SNP_IGA_104466	1	34128181
SNP_IGA_104812	1	34324185
SNP_IGA_104819	1	34325189
SNP_IGA_104857	1	34348489
SNP_IGA_104890	1	34404100
SNP_IGA_105106	1	34459569
SNP_IGA_105122	1	34463626
SNP_IGA_105206	1	34481973
SNP_IGA_105536	1	34610781
SNP_IGA_105878	1	34737844
SNP_IGA_105890	1	34744559
SNP_IGA_106000	1	34830062
SNP_IGA_106146	1	34877986
SNP_IGA_106177	1	34882909
SNP_IGA_106673	1	35090296
SNP_IGA_106756	1	35100462
SNP_IGA_106841	1	35124612
SNP_IGA_107029	1	35186885
SNP_IGA_107581	1	35511337
SNP_IGA_107619	1	35529762
SNP_IGA_107745	1	35577822
SNP_IGA_108053	1	35673916
SNP_IGA_108171	1	35737938
SNP_IGA_108299	1	35785216
SNP_IGA_108317	1	35790143
SNP_IGA_108532	1	35854290
SNP_IGA_109276	1	36201800
SNP_IGA_109283	1	36204651
SNP_IGA_109287	1	36205411
SNP_IGA_109353	1	36241956
SNP_IGA_109406	1	36245941
SNP_IGA_109922	1	36421647
SNP_IGA_110041	1	36482331
SNP_IGA_110634	1	36646945
SNP_IGA_110638	1	36647046
SNP_IGA_110712	1	36670774
SNP_IGA_110845	1	36722447
SNP_IGA_110863	1	36728160
SNP_IGA_110973	1	36765579
SNP_IGA_110977	1	36766943
SNP_IGA_111017	1	36771628
SNP_IGA_111026	1	36773575
SNP_IGA_111054	1	36805333
SNP_IGA_111259	1	37040892
SNP_IGA_111307	1	37065225
SNP_IGA_111314	1	37066136
SNP_IGA_111329	1	37071398
SNP_IGA_111539	1	37242573
SNP_IGA_111755	1	37306897
SNP_IGA_111858	1	37373183
SNP_IGA_111882	1	37390261
SNP_IGA_111946	1	37425560
SNP_IGA_112042	1	37501233
SNP_IGA_112112	1	37534135
SNP_IGA_112351	1	37672019
SNP_IGA_112376	1	37675584
SNP_IGA_112450	1	37699129
SNP_IGA_112531	1	37709537
SNP_IGA_112550	1	37711479
SNP_IGA_112556	1	37713108
SNP_IGA_112690	1	37732185
SNP_IGA_112698	1	37734647
SNP_IGA_112924	1	37804784
SNP_IGA_113033	1	37837517
SNP_IGA_113039	1	37838303
SNP_IGA_113314	1	37920831
SNP_IGA_113348	1	37937694
SNP_IGA_113361	1	37944213
SNP_IGA_113449	1	37999979
SNP_IGA_113519	1	38032494
SNP_IGA_113582	1	38067987
SNP_IGA_113607	1	38082541
SNP_IGA_113678	1	38124403
SNP_IGA_113947	1	38222294
SNP_IGA_113971	1	38230978
SNP_IGA_114094	1	38287001
SNP_IGA_114146	1	38302464
SNP_IGA_114192	1	38306794
SNP_IGA_114234	1	38322971
SNP_IGA_114286	1	38363273
SNP_IGA_114495	1	38398691
SNP_IGA_114581	1	38440239
SNP_IGA_114684	1	38468451
SNP_IGA_114741	1	38484194
SNP_IGA_114770	1	38511277
SNP_IGA_114898	1	38560322
SNP_IGA_115151	1	38719128
SNP_IGA_115560	1	38898358
SNP_IGA_115726	1	38966259
SNP_IGA_115957	1	39087086
SNP_IGA_115971	1	39087503
SNP_IGA_115975	1	39087697
SNP_IGA_117999	1	40030680
snp_1_39059187	1	40032555
SNP_IGA_118058	1	40036034
SNP_IGA_118212	1	40085751
SNP_IGA_118371	1	40178780
SNP_IGA_118639	1	40283671
SNP_IGA_118784	1	40352725
SNP_IGA_119391	1	40620294
SNP_IGA_120003	1	40990021
SNP_IGA_120057	1	41027825
SNP_IGA_120784	1	41413142
SNP_IGA_120926	1	41498792
SNP_IGA_121073	1	41513908
SNP_IGA_121212	1	41585471
SNP_IGA_121401	1	41649424
SNP_IGA_121413	1	41652745
SNP_IGA_121659	1	41709139
SNP_IGA_121740	1	41735317
SNP_IGA_121817	1	41792820
SNP_IGA_121865	1	41818269
SNP_IGA_122047	1	41980790
SNP_IGA_123023	1	42754924
SNP_IGA_123089	1	42795711
SNP_IGA_123180	1	42902626
SNP_IGA_136096	1	42968916
SNP_IGA_136005	1	43013277
snp_1_46757382	1	43058300
SNP_IGA_135737	1	43109980
SNP_IGA_135241	1	43271317
SNP_IGA_135229	1	43271586
SNP_IGA_135224	1	43271711
SNP_IGA_135202	1	43272556
SNP_IGA_135137	1	43337658
SNP_IGA_135006	1	43421329
SNP_IGA_134923	1	43491158
SNP_IGA_134854	1	43515708
SNP_IGA_134730	1	43578596
SNP_IGA_134631	1	43678270
SNP_IGA_134518	1	43743451
SNP_IGA_134484	1	43779641
SNP_IGA_133606	1	44069867
SNP_IGA_133183	1	44284671
SNP_IGA_133115	1	44320716
SNP_IGA_132974	1	44346062
SNP_IGA_132901	1	44350825
SNP_IGA_132888	1	44351342
SNP_IGA_132883	1	44351415
SNP_IGA_132855	1	44352561
SNP_IGA_132843	1	44352748
SNP_IGA_132155	1	44879796
SNP_IGA_132047	1	44904968
SNP_IGA_131988	1	44913729
SNP_IGA_131801	1	45004037
SNP_IGA_131746	1	45008832
SNP_IGA_131740	1	45009054
SNP_IGA_131644	1	45019530
SNP_IGA_131589	1	45021914
SNP_IGA_131571	1	45022200
SNP_IGA_131557	1	45022954
SNP_IGA_131324	1	45053469
SNP_IGA_131284	1	45057152
SNP_IGA_131130	1	45083225
SNP_IGA_131037	1	45092724
SNP_IGA_130925	1	45125156
SNP_IGA_130764	1	45145386
SNP_IGA_130493	1	45237616
SNP_IGA_130229	1	45350266
SNP_IGA_129512	1	45448596
SNP_IGA_129422	1	45459468
SNP_IGA_128925	1	45526898
SNP_IGA_128625	1	45581205
SNP_IGA_128603	1	45586061
SNP_IGA_128189	1	45753343
SNP_IGA_128148	1	45764232
SNP_IGA_127836	1	45821173
SNP_IGA_127673	1	45841357
SNP_IGA_127323	1	45900381
SNP_IGA_127181	1	46012310
SNP_IGA_126857	1	46125525
SNP_IGA_126668	1	46225560
SNP_IGA_126158	1	46430951
SNP_IGA_126124	1	46434126
SNP_IGA_125219	1	46984218
SNP_IGA_125029	1	47074731
SNP_IGA_124778	1	47187541
SNP_IGA_124689	1	47196747
SNP_IGA_124639	1	47200674
SNP_IGA_124466	1	47222386
SNP_IGA_124160	1	47422241
SNP_IGA_123834	1	47470681
SNP_IGA_123766	1	47489467
SNP_IGA_123719	1	47532400
SNP_IGA_123671	1	47550728
SNP_IGA_238423	2	201667
SNP_IGA_238375	2	227114
SNP_IGA_238135	2	241474
SNP_IGA_238108	2	244002
SNP_IGA_238101	2	244399
SNP_IGA_238077	2	246414
SNP_IGA_237930	2	253759
SNP_IGA_237902	2	256365
SNP_IGA_237679	2	298785
SNP_IGA_237339	2	378366
SNP_IGA_237273	2	397976
SNP_IGA_237020	2	429643
SNP_IGA_236873	2	443078
SNP_IGA_236666	2	460506
SNP_IGA_236630	2	463961
SNP_IGA_236414	2	475594
SNP_IGA_236409	2	475884
SNP_IGA_236179	2	486877
SNP_IGA_236039	2	495441
SNP_IGA_235684	2	580587
SNP_IGA_235284	2	682093
SNP_IGA_235188	2	700091
SNP_IGA_235112	2	716532
SNP_IGA_234465	2	788109
SNP_IGA_234414	2	796774
SNP_IGA_233804	2	897200
SNP_IGA_233375	2	929698
SNP_IGA_232903	2	1060183
SNP_IGA_230378	2	1339715
SNP_IGA_230309	2	1344910
SNP_IGA_230290	2	1346909
SNP_IGA_230270	2	1349947
SNP_IGA_230195	2	1365678
SNP_IGA_229259	2	1517856
SNP_IGA_229027	2	1552252
SNP_IGA_229004	2	1552838
SNP_IGA_137253	2	2207319
SNP_IGA_137745	2	2258763
SNP_IGA_137839	2	2275555
SNP_IGA_138722	2	2394887
SNP_IGA_138882	2	2400306
Pp25Cl	2	2401721
SNP_IGA_139036	2	2407957
SNP_IGA_139270	2	2438078
SNP_IGA_139433	2	2449019
SNP_IGA_139468	2	2452185
SNP_IGA_139612	2	2459158
SNP_IGA_139783	2	2467918
SNP_IGA_140089	2	2478637
SNP_IGA_140097	2	2479028
SNP_IGA_140105	2	2479212
SNP_IGA_140352	2	2487397
SNP_IGA_140371	2	2491139
SNP_IGA_140441	2	2494820
SNP_IGA_141624	2	2627431
SNP_IGA_141858	2	2657912
SNP_IGA_142214	2	2687246
SNP_IGA_142231	2	2688685
SNP_IGA_142473	2	2708050
SNP_IGA_142530	2	2715748
SNP_IGA_142599	2	2722993
SNP_IGA_143002	2	2758026
SNP_IGA_143150	2	2769853
SNP_IGA_143246	2	2775897
SNP_IGA_143260	2	2776511
SNP_IGA_143346	2	2780221
SNP_IGA_143360	2	2781336
SNP_IGA_143917	2	2803873
SNP_IGA_144833	2	2855201
SNP_IGA_144878	2	2862318
SNP_IGA_144902	2	2863865
SNP_IGA_144913	2	2864771
SNP_IGA_144919	2	2865217
SNP_IGA_144961	2	2868304
SNP_IGA_145303	2	2885559
SNP_IGA_145447	2	2895768
SNP_IGA_145505	2	2903590
SNP_IGA_145514	2	2907127
SNP_IGA_145601	2	2912275
SNP_IGA_145717	2	2920993
SNP_IGA_146220	2	2936109
SNP_IGA_146706	2	2967450
SNP_IGA_146765	2	2969445
SNP_IGA_148760	2	3109681
SNP_IGA_148770	2	3110417
SNP_IGA_148777	2	3110884
SNP_IGA_149668	2	3185530
SNP_IGA_149868	2	3205510
SNP_IGA_149957	2	3213504
SNP_IGA_150673	2	3277607
SNP_IGA_150678	2	3277794
SNP_IGA_150857	2	3298665
SNP_IGA_150874	2	3299064
SNP_IGA_151067	2	3310858
SNP_IGA_151613	2	3389258
SNP_IGA_152082	2	3445500
SNP_IGA_152111	2	3448029
SNP_IGA_152301	2	3461234
SNP_IGA_152320	2	3462775
SNP_IGA_152325	2	3463376
SNP_IGA_152330	2	3463605
SNP_IGA_152651	2	3494948
SNP_IGA_152660	2	3495140
SNP_IGA_152809	2	3501593
SNP_IGA_152969	2	3507122
SNP_IGA_152976	2	3507281
SNP_IGA_153346	2	3524590
SNP_IGA_153388	2	3527513
SNP_IGA_153443	2	3530395
SNP_IGA_153548	2	3541528
SNP_IGA_153556	2	3542674
SNP_IGA_153560	2	3542773
SNP_IGA_153679	2	3549818
SNP_IGA_153686	2	3550557
SNP_IGA_153773	2	3559366
SNP_IGA_153785	2	3560862
SNP_IGA_154038	2	3573856
SNP_IGA_154354	2	3633443
SNP_IGA_154600	2	3643728
SNP_IGA_155407	2	3675060
SNP_IGA_155433	2	3675767
SNP_IGA_155461	2	3676558
SNP_IGA_155673	2	3693801
SNP_IGA_155680	2	3695502
SNP_IGA_155982	2	3716056
SNP_IGA_156002	2	3718034
SNP_IGA_156070	2	3725516
SNP_IGA_156095	2	3727492
SNP_IGA_156313	2	3754468
SNP_IGA_156774	2	3789203
SNP_IGA_157034	2	3801537
SNP_IGA_157433	2	3840440
SNP_IGA_157529	2	3860770
SNP_IGA_157556	2	3865662
SNP_IGA_157644	2	3880140
SNP_IGA_157737	2	3891971
SNP_IGA_159268	2	4010913
SNP_IGA_159789	2	4068923
SNP_IGA_159811	2	4070791
SNP_IGA_159829	2	4071331
SNP_IGA_159849	2	4071669
SNP_IGA_159858	2	4071905
SNP_IGA_160222	2	4119043
SNP_IGA_160343	2	4130313
SNP_IGA_160938	2	4172141
SNP_IGA_161939	2	4224893
SNP_IGA_163222	2	4314052
SNP_IGA_163292	2	4316476
SNP_IGA_163339	2	4318175
SNP_IGA_163542	2	4343366
SNP_IGA_163588	2	4347958
SNP_IGA_163716	2	4354000
SNP_IGA_163725	2	4354493
SNP_IGA_164367	2	4419209
SNP_IGA_164844	2	4467301
SNP_IGA_165322	2	4506646
SNP_IGA_165352	2	4508312
SNP_IGA_165503	2	4524343
SNP_IGA_165885	2	4554518
SNP_IGA_166043	2	4569237
SNP_IGA_166330	2	4602439
SNP_IGA_166779	2	4639854
SNP_IGA_166896	2	4647354
SNP_IGA_166901	2	4648349
SNP_IGA_167438	2	4694064
SNP_IGA_167466	2	4695267
SNP_IGA_167473	2	4695621
SNP_IGA_167776	2	4712851
SNP_IGA_167905	2	4720630
SNP_IGA_167929	2	4721370
SNP_IGA_167934	2	4721586
SNP_IGA_168362	2	4758542
SNP_IGA_168371	2	4759480
SNP_IGA_168380	2	4760060
SNP_IGA_168389	2	4760755
SNP_IGA_168406	2	4761702
SNP_IGA_168413	2	4761924
SNP_IGA_168457	2	4764072
SNP_IGA_168462	2	4764248
SNP_IGA_169076	2	4783841
SNP_IGA_170097	2	4827711
SNP_IGA_170129	2	4829886
SNP_IGA_170137	2	4830032
SNP_IGA_170392	2	4846304
SNP_IGA_170968	2	4877158
SNP_IGA_171044	2	4879821
SNP_IGA_171092	2	4881548
SNP_IGA_171112	2	4883075
SNP_IGA_171141	2	4884907
SNP_IGA_171584	2	4900714
SNP_IGA_171909	2	4913749
SNP_IGA_171984	2	4916796
SNP_IGA_172653	2	4938668
SNP_IGA_172993	2	4974083
SNP_IGA_173418	2	4986802
SNP_IGA_173422	2	4986854
SNP_IGA_174747	2	5038230
SNP_IGA_174897	2	5054749
SNP_IGA_174929	2	5056209
SNP_IGA_174941	2	5056852
SNP_IGA_174947	2	5057214
SNP_IGA_174955	2	5057520
SNP_IGA_175265	2	5077587
SNP_IGA_175675	2	5100396
SNP_IGA_175990	2	5142545
SNP_IGA_176218	2	5175622
SNP_IGA_176711	2	5231299
SNP_IGA_176737	2	5233735
SNP_IGA_176750	2	5235254
SNP_IGA_176807	2	5239595
SNP_IGA_176900	2	5255775
SNP_IGA_177649	2	5309425
SNP_IGA_177692	2	5311548
SNP_IGA_177709	2	5311974
SNP_IGA_178504	2	5373320
SNP_IGA_179038	2	5411547
SNP_IGA_179122	2	5423981
SNP_IGA_179356	2	5447582
SNP_IGA_179577	2	5464664
Pp5Cl	2	5464838
SNP_IGA_179626	2	5466732
SNP_IGA_179640	2	5467549
SNP_IGA_179644	2	5467809
Pp1Cl	2	5468647
SNP_IGA_180079	2	5482444
SNP_IGA_180355	2	5499854
SNP_IGA_180421	2	5502534
SNP_IGA_180426	2	5502893
SNP_IGA_180431	2	5503386
SNP_IGA_180512	2	5506291
SNP_IGA_180628	2	5513154
SNP_IGA_180845	2	5522500
SNP_IGA_180853	2	5523028
SNP_IGA_181266	2	5542722
SNP_IGA_181324	2	5543611
SNP_IGA_181392	2	5544807
SNP_IGA_181402	2	5544943
SNP_IGA_181521	2	5547958
SNP_IGA_181527	2	5548028
SNP_IGA_181795	2	5557591
SNP_IGA_181812	2	5559245
SNP_IGA_181830	2	5560721
SNP_IGA_181880	2	5564966
SNP_IGA_182333	2	5591372
SNP_IGA_182419	2	5595245
SNP_IGA_182561	2	5600969
SNP_IGA_182566	2	5601103
SNP_IGA_182585	2	5601791
SNP_IGA_182590	2	5601917
SNP_IGA_182612	2	5602749
SNP_IGA_182832	2	5617210
SNP_IGA_182838	2	5617439
SNP_IGA_182843	2	5617841
SNP_IGA_182848	2	5618206
SNP_IGA_183126	2	5641250
SNP_IGA_183210	2	5644717
SNP_IGA_183730	2	5665194
SNP_IGA_183737	2	5665619
SNP_IGA_183743	2	5666026
SNP_IGA_183833	2	5670087
SNP_IGA_184157	2	5700668
SNP_IGA_184162	2	5700824
SNP_IGA_184177	2	5701939
SNP_IGA_184182	2	5702205
SNP_IGA_184544	2	5717835
SNP_IGA_184675	2	5728896
SNP_IGA_184725	2	5731974
SNP_IGA_184732	2	5732272
SNP_IGA_184738	2	5732765
SNP_IGA_184750	2	5733777
SNP_IGA_185056	2	5751663
SNP_IGA_185597	2	5771590
SNP_IGA_185608	2	5772285
SNP_IGA_185638	2	5774561
SNP_IGA_185721	2	5778677
SNP_IGA_186785	2	5860644
SNP_IGA_186803	2	5862201
SNP_IGA_186819	2	5863596
SNP_IGA_186899	2	5868415
SNP_IGA_186905	2	5868481
SNP_IGA_187399	2	5903294
SNP_IGA_187486	2	5931569
SNP_IGA_187679	2	5976198
SNP_IGA_187693	2	5977416
SNP_IGA_188199	2	6014692
SNP_IGA_188331	2	6022881
SNP_IGA_188434	2	6027299
SNP_IGA_188472	2	6029902
SNP_IGA_188478	2	6030216
SNP_IGA_188519	2	6031712
SNP_IGA_188524	2	6031862
SNP_IGA_188540	2	6032310
SNP_IGA_188736	2	6043326
SNP_IGA_188920	2	6056729
SNP_IGA_189085	2	6061178
SNP_IGA_189122	2	6062332
SNP_IGA_189129	2	6062548
SNP_IGA_189146	2	6062850
SNP_IGA_189181	2	6064442
SNP_IGA_189962	2	6104864
SNP_IGA_191614	2	6211027
SNP_IGA_192621	2	6261247
SNP_IGA_192643	2	6261644
SNP_IGA_193650	2	6370020
SNP_IGA_193945	2	6429077
SNP_IGA_193969	2	6430229
SNP_IGA_194037	2	6461998
SNP_IGA_194041	2	6462267
SNP_IGA_194054	2	6462693
SNP_IGA_194061	2	6462955
SNP_IGA_194068	2	6463201
SNP_IGA_194080	2	6463491
SNP_IGA_194090	2	6463660
SNP_IGA_194097	2	6463793
SNP_IGA_194110	2	6464247
SNP_IGA_194334	2	6476097
SNP_IGA_194408	2	6481039
SNP_IGA_194416	2	6481518
SNP_IGA_194572	2	6490248
SNP_IGA_195069	2	6542937
SNP_IGA_195134	2	6545323
SNP_IGA_195139	2	6545496
SNP_IGA_195145	2	6546105
SNP_IGA_195150	2	6546350
SNP_IGA_195166	2	6547067
SNP_IGA_195176	2	6547244
SNP_IGA_196803	2	6636560
SNP_IGA_196845	2	6638063
SNP_IGA_196851	2	6638133
SNP_IGA_196879	2	6639087
SNP_IGA_196907	2	6640367
SNP_IGA_196912	2	6640623
SNP_IGA_197184	2	6649362
SNP_IGA_197190	2	6649687
SNP_IGA_197202	2	6649942
SNP_IGA_197214	2	6650126
SNP_IGA_197236	2	6650921
SNP_IGA_197242	2	6651014
SNP_IGA_197246	2	6651116
SNP_IGA_197262	2	6651245
SNP_IGA_197266	2	6651292
SNP_IGA_197361	2	6654007
SNP_IGA_197705	2	6680865
SNP_IGA_197717	2	6681686
SNP_IGA_197725	2	6681809
snp_scaffold_2_4947054	2	6692098
SNP_IGA_198090	2	6704441
SNP_IGA_198315	2	6727502
SNP_IGA_198324	2	6727694
SNP_IGA_198339	2	6728294
SNP_IGA_198659	2	6751435
SNP_IGA_198668	2	6751763
SNP_IGA_198677	2	6752232
SNP_IGA_198691	2	6753400
SNP_IGA_198699	2	6753677
SNP_IGA_198723	2	6754600
SNP_IGA_198937	2	6764663
SNP_IGA_199043	2	6770795
SNP_IGA_201952	2	6901447
SNP_IGA_203091	2	7075381
SNP_IGA_204240	2	7155357
SNP_IGA_204969	2	7215749
SNP_IGA_205001	2	7217184
SNP_IGA_205696	2	7236611
SNP_IGA_205742	2	7239737
SNP_IGA_206197	2	7327299
SNP_IGA_206245	2	7331786
SNP_IGA_206250	2	7333335
SNP_IGA_206477	2	7428855
SNP_IGA_206649	2	7460702
SNP_IGA_207592	2	7609681
SNP_IGA_207600	2	7610099
SNP_IGA_207765	2	7634688
SNP_IGA_207948	2	7662160
SNP_IGA_208462	2	7704800
SNP_IGA_208760	2	7760204
SNP_IGA_209271	2	7905751
SNP_IGA_210222	2	8058324
SNP_IGA_214542	2	8562494
SNP_IGA_214576	2	8573843
SNP_IGA_214594	2	8575875
SNP_IGA_215563	2	8748723
SNP_IGA_217686	2	8937623
SNP_IGA_217696	2	8938317
SNP_IGA_217794	2	8950628
SNP_IGA_217815	2	8955153
SNP_IGA_218596	2	9031544
SNP_IGA_218801	2	9053696
SNP_IGA_222757	2	9716810
SNP_IGA_223473	2	9814447
SNP_IGA_223483	2	9815330
SNP_IGA_223668	2	9858560
SNP_IGA_223676	2	9859122
snp_4_22274908	2	10760340
SNP_IGA_464190	2	10779546
SNP_IGA_463805	2	10884624
SNP_IGA_463646	2	10935878
SNP_IGA_461613	2	11416853
SNP_IGA_460591	2	11551542
SNP_IGA_459355	2	11861342
SNP_IGA_459301	2	11864049
SNP_IGA_458918	2	11888575
SNP_IGA_458902	2	11892128
SNP_IGA_458185	2	12006742
SNP_IGA_457956	2	12048280
SNP_IGA_457217	2	12110846
SNP_IGA_457171	2	12113818
SNP_IGA_456943	2	12129454
SNP_IGA_456657	2	12153094
SNP_IGA_456647	2	12153354
SNP_IGA_456642	2	12153402
SNP_IGA_456637	2	12153506
SNP_IGA_456226	2	12190022
SNP_IGA_456188	2	12191712
SNP_IGA_455724	2	12233051
SNP_IGA_455330	2	12300852
SNP_IGA_905196	2	13180940
SNP_IGA_906871	2	13368555
SNP_IGA_240162	2	13486292
SNP_IGA_240333	2	13538167
SNP_IGA_240770	2	13596264
SNP_IGA_241722	2	13657480
SNP_IGA_242118	2	13717350
SNP_IGA_244140	2	13949324
SNP_IGA_244705	2	14033067
SNP_IGA_244951	2	14090202
SNP_IGA_245182	2	14147049
SNP_IGA_245204	2	14147600
SNP_IGA_245214	2	14148007
SNP_IGA_245232	2	14149633
SNP_IGA_245946	2	14320631
SNP_IGA_246838	2	14499552
SNP_IGA_248434	2	14819294
SNP_IGA_248528	2	14847997
SNP_IGA_249273	2	14979078
SNP_IGA_249781	2	15218516
SNP_IGA_249804	2	15223119
SNP_IGA_249849	2	15242439
SNP_IGA_250558	2	15474980
SNP_IGA_250658	2	15484608
SNP_IGA_250856	2	15510061
SNP_IGA_250870	2	15512862
SNP_IGA_251253	2	15636127
SNP_IGA_251591	2	15694046
SNP_IGA_252165	2	15744138
SNP_IGA_252287	2	15784654
SNP_IGA_252301	2	15787334
SNP_IGA_252305	2	15787443
SNP_IGA_252310	2	15787614
SNP_IGA_252317	2	15787855
SNP_IGA_252365	2	15797761
SNP_IGA_252569	2	15822465
SNP_IGA_252707	2	15840241
SNP_IGA_252916	2	15847774
SNP_IGA_252937	2	15848915
SNP_IGA_252943	2	15849155
SNP_IGA_252957	2	15849694
SNP_IGA_253034	2	15866144
SNP_IGA_253070	2	15886613
SNP_IGA_253074	2	15886843
SNP_IGA_253223	2	15899694
SNP_IGA_253228	2	15900344
SNP_IGA_255903	2	16284778
SNP_IGA_258340	2	17040217
SNP_IGA_258558	2	17181233
SNP_IGA_258854	2	17219077
SNP_IGA_258978	2	17234033
SNP_IGA_258996	2	17241241
SNP_IGA_259741	2	17427335
SNP_IGA_260053	2	17467689
SNP_IGA_260354	2	17550111
SNP_IGA_260361	2	17551347
SNP_IGA_260373	2	17552314
SNP_IGA_260384	2	17552721
SNP_IGA_261034	2	17640835
SNP_IGA_261135	2	17654575
SNP_IGA_261410	2	17680477
SNP_IGA_261581	2	17688481
SNP_IGA_261588	2	17689903
SNP_IGA_261595	2	17691161
SNP_IGA_261606	2	17692613
SNP_IGA_261611	2	17693915
SNP_IGA_261865	2	17748552
SNP_IGA_261920	2	17762876
SNP_IGA_261985	2	17771697
SNP_IGA_262078	2	17778080
SNP_IGA_262277	2	17863248
SNP_IGA_765601	2	18341769
SNP_IGA_765789	2	18376473
SNP_IGA_765970	2	18406286
SNP_IGA_766339	2	18466867
SNP_IGA_766847	2	18581967
SNP_IGA_766862	2	18583170
SNP_IGA_766870	2	18583359
SNP_IGA_766992	2	18613550
SNP_IGA_767724	2	18737677
SNP_IGA_263042	2	18958881
SNP_IGA_263098	2	19001210
SNP_IGA_263828	2	19233500
SNP_IGA_264149	2	19390416
SNP_IGA_264220	2	19404885
SNP_IGA_264293	2	19423538
SNP_IGA_264399	2	19466555
SNP_IGA_264409	2	19470301
SNP_IGA_264590	2	19527264
SNP_IGA_265240	2	19674157
SNP_IGA_265471	2	19694229
SNP_IGA_265517	2	19698519
SNP_IGA_265528	2	19698823
SNP_IGA_265783	2	19719152
SNP_IGA_266017	2	19735297
SNP_IGA_266058	2	19743536
SNP_IGA_266063	2	19744284
SNP_IGA_266305	2	19776973
SNP_IGA_266317	2	19778181
SNP_IGA_266322	2	19778958
SNP_IGA_266359	2	19785133
SNP_IGA_266411	2	19797245
SNP_IGA_268131	2	20081282
SNP_IGA_268182	2	20094959
SNP_IGA_268215	2	20101838
SNP_IGA_269074	2	20689203
SNP_IGA_269093	2	20693168
SNP_IGA_269160	2	20713718
SNP_IGA_269232	2	20772666
SNP_IGA_269327	2	20801760
SNP_IGA_269403	2	20861232
SNP_IGA_269409	2	20861823
SNP_IGA_269416	2	20862174
SNP_IGA_269432	2	20869573
SNP_IGA_269660	2	20980884
SNP_IGA_270116	2	21107115
SNP_IGA_270199	2	21109279
SNP_IGA_270445	2	21134084
SNP_IGA_270459	2	21134777
SNP_IGA_272087	2	21287111
SNP_IGA_272162	2	21293473
SNP_IGA_272372	2	21315836
SNP_IGA_272504	2	21368008
SNP_IGA_272597	2	21410479
snp_scaffold_2_18006017	2	21582296
SNP_IGA_273623	2	21757389
SNP_IGA_273894	2	21818397
SNP_IGA_273993	2	21854619
SNP_IGA_274016	2	21859914
SNP_IGA_274133	2	21893084
SNP_IGA_274142	2	21893276
SNP_IGA_274187	2	21894387
SNP_IGA_274310	2	21897299
SNP_IGA_274331	2	21898312
SNP_IGA_274867	2	22045337
SNP_IGA_275057	2	22100585
SNP_IGA_275189	2	22195492
SNP_IGA_275341	2	22246297
SNP_IGA_275364	2	22260069
SNP_IGA_275481	2	22283128
SNP_IGA_275502	2	22301505
SNP_IGA_275642	2	22333667
SNP_IGA_276426	2	22465363
SNP_IGA_276571	2	22528170
SNP_IGA_276840	2	22618261
SNP_IGA_277102	2	22844191
SNP_IGA_277273	2	22960663
SNP_IGA_277336	2	23010596
SNP_IGA_277343	2	23012055
SNP_IGA_277359	2	23020462
SNP_IGA_277378	2	23023244
SNP_IGA_277471	2	23050601
SNP_IGA_277616	2	23165331
SNP_IGA_278061	2	23453432
SNP_IGA_281266	2	24845912
SNP_IGA_282671	2	25571682
SNP_IGA_286335	2	28055346
SNP_IGA_286418	2	28186294
SNP_IGA_287581	2	28786623
SNP_IGA_287629	2	28808464
SNP_IGA_287842	2	28863393
SNP_IGA_287846	2	28864396
SNP_IGA_287875	2	28885199
SNP_IGA_287919	2	28921027
SNP_IGA_288000	2	28966007
SNP_IGA_288054	2	28997843
SNP_IGA_288098	2	29001997
SNP_IGA_288187	2	29032418
SNP_IGA_288267	2	29088081
SNP_IGA_288668	2	29241773
SNP_IGA_288752	2	29282888
SNP_IGA_288845	2	29376788
SNP_IGA_288893	2	29396183
SNP_IGA_288975	2	29462315
SNP_IGA_289364	2	29752357
SNP_IGA_289486	2	29824510
SNP_IGA_289567	2	29853834
SNP_IGA_289644	2	29880522
SNP_IGA_290175	2	30177191
SNP_IGA_290243	2	30212930
SNP_IGA_290277	2	30238542
snp_2_26731591	2	30329738
SNP_IGA_897342	3	63954
SNP_IGA_898654	3	742389
SNP_IGA_291021	3	924446
SNP_IGA_291055	3	929735
snp_scaffold_3_118265	3	980103
snp_scaffold_3_130507	3	992345
snp_scaffold_3_146105	3	1007943
SNP_IGA_291248	3	1041872
SNP_IGA_291987	3	1260092
SNP_IGA_292008	3	1265195
SNP_IGA_292179	3	1290796
SNP_IGA_292185	3	1291496
SNP_IGA_292215	3	1297579
SNP_IGA_292238	3	1302228
SNP_IGA_292307	3	1316668
SNP_IGA_292384	3	1360669
SNP_IGA_292965	3	1674537
SNP_IGA_293254	3	1823794
SNP_IGA_293290	3	1827175
SNP_IGA_293318	3	1838599
SNP_IGA_293522	3	1939056
SNP_IGA_293909	3	2050064
SNP_IGA_293925	3	2054358
SNP_IGA_294410	3	2213320
SNP_IGA_294513	3	2246149
SNP_IGA_294533	3	2252377
SNP_IGA_294651	3	2263737
SNP_IGA_294747	3	2290410
SNP_IGA_295433	3	2839269
SNP_IGA_295440	3	2840350
SNP_IGA_295584	3	2895781
SNP_IGA_295644	3	2902509
SNP_IGA_295649	3	2902943
SNP_IGA_295658	3	2903469
SNP_IGA_295664	3	2904624
SNP_IGA_295679	3	2909563
SNP_IGA_295763	3	2922341
SNP_IGA_295913	3	3018515
SNP_IGA_295978	3	3058863
SNP_IGA_296203	3	3148187
SNP_IGA_296290	3	3195219
SNP_IGA_296355	3	3207060
SNP_IGA_296553	3	3238014
SNP_IGA_296562	3	3240554
SNP_IGA_296682	3	3297999
SNP_IGA_296886	3	3384939
SNP_IGA_296900	3	3390662
SNP_IGA_297128	3	3507642
SNP_IGA_297349	3	3601861
SNP_IGA_297363	3	3606280
SNP_IGA_297495	3	3634503
SNP_IGA_297497	3	3635392
SNP_IGA_297507	3	3636637
SNP_IGA_297841	3	3802524
SNP_IGA_298007	3	3849042
SNP_IGA_298109	3	3884262
SNP_IGA_298139	3	3892167
SNP_IGA_298154	3	3895956
SNP_IGA_298287	3	3923841
SNP_IGA_298293	3	3924440
SNP_IGA_298308	3	3925205
SNP_IGA_298409	3	3931443
SNP_IGA_298417	3	3932359
SNP_IGA_298449	3	3934669
SNP_IGA_298541	3	3948839
SNP_IGA_298575	3	3951918
SNP_IGA_298580	3	3952054
SNP_IGA_298589	3	3952780
SNP_IGA_298636	3	3955088
SNP_IGA_298785	3	3965622
SNP_IGA_298790	3	3965925
SNP_IGA_298802	3	3967730
SNP_IGA_298853	3	3973015
SNP_IGA_298935	3	3989094
SNP_IGA_298943	3	3989754
SNP_IGA_299003	3	3996613
SNP_IGA_299091	3	4024362
SNP_IGA_299341	3	4078942
SNP_IGA_299532	3	4123541
SNP_IGA_299796	3	4209014
SNP_IGA_300098	3	4253071
SNP_IGA_300331	3	4338580
SNP_IGA_300389	3	4349089
SNP_IGA_300546	3	4382308
SNP_IGA_300851	3	4447524
SNP_IGA_300877	3	4465511
SNP_IGA_300953	3	4477028
SNP_IGA_301265	3	4544835
SNP_IGA_301444	3	4577935
SNP_IGA_301473	3	4586701
SNP_IGA_301707	3	4633314
SNP_IGA_301723	3	4637892
SNP_IGA_301843	3	4652712
SNP_IGA_301903	3	4655855
SNP_IGA_301913	3	4656100
SNP_IGA_301946	3	4659285
SNP_IGA_301956	3	4659802
snp_scaffold_3_3799106	3	4659991
SNP_IGA_302042	3	4679428
SNP_IGA_302772	3	4764398
SNP_IGA_303514	3	4845567
SNP_IGA_303527	3	4847278
SNP_IGA_303535	3	4848339
SNP_IGA_303564	3	4850180
SNP_IGA_304082	3	4909251
SNP_IGA_304157	3	4934496
SNP_IGA_304227	3	4940656
SNP_IGA_304307	3	4946629
SNP_IGA_304755	3	5054189
SNP_IGA_304773	3	5058030
SNP_IGA_304790	3	5061816
SNP_IGA_304835	3	5071190
SNP_IGA_304930	3	5090436
SNP_IGA_305427	3	5189172
SNP_IGA_305449	3	5199286
SNP_IGA_305762	3	5279843
SNP_IGA_305895	3	5330033
SNP_IGA_306024	3	5365326
SNP_IGA_306147	3	5439416
SNP_IGA_306593	3	5656350
SNP_IGA_306604	3	5663242
SNP_IGA_306624	3	5667062
SNP_IGA_306640	3	5670995
SNP_IGA_306650	3	5673399
SNP_IGA_306687	3	5681659
SNP_IGA_306856	3	5702142
SNP_IGA_306900	3	5715583
SNP_IGA_307037	3	5763928
SNP_IGA_307230	3	5805089
SNP_IGA_307422	3	5889021
SNP_IGA_307596	3	5921975
SNP_IGA_307918	3	6095233
SNP_IGA_307983	3	6106525
SNP_IGA_308290	3	6256189
SNP_IGA_308291	3	6258523
SNP_IGA_308522	3	6284739
SNP_IGA_308528	3	6284978
SNP_IGA_308756	3	6365282
SNP_IGA_309116	3	6470387
SNP_IGA_309280	3	6507505
SNP_IGA_309333	3	6518784
SNP_IGA_309338	3	6518986
SNP_IGA_309473	3	6571458
SNP_IGA_309554	3	6596824
SNP_IGA_309635	3	6602423
SNP_IGA_309737	3	6616690
SNP_IGA_309872	3	6638641
SNP_IGA_309881	3	6640591
SNP_IGA_310057	3	6704799
SNP_IGA_310338	3	6750086
SNP_IGA_310356	3	6753798
SNP_IGA_310361	3	6754745
SNP_IGA_310467	3	6786896
SNP_IGA_310548	3	6819079
SNP_IGA_310553	3	6819539
SNP_IGA_310566	3	6819673
SNP_IGA_310760	3	6832779
SNP_IGA_310982	3	6859561
SNP_IGA_311011	3	6860966
SNP_IGA_311016	3	6861429
SNP_IGA_311192	3	6888998
SNP_IGA_311196	3	6890057
SNP_IGA_311300	3	6912897
SNP_IGA_311537	3	7001781
SNP_IGA_311645	3	7014144
SNP_IGA_311856	3	7041237
SNP_IGA_311941	3	7059470
SNP_IGA_312052	3	7088012
SNP_IGA_312409	3	7143135
SNP_IGA_313117	3	7311014
SNP_IGA_313464	3	7369774
SNP_IGA_313615	3	7405545
SNP_IGA_313623	3	7406427
SNP_IGA_314353	3	7575504
SNP_IGA_314404	3	7608000
SNP_IGA_314503	3	7640844
SNP_IGA_314509	3	7641411
SNP_IGA_314521	3	7642274
SNP_IGA_314544	3	7644164
SNP_IGA_314588	3	7647606
SNP_IGA_314598	3	7648401
SNP_IGA_314631	3	7652977
SNP_IGA_315040	3	7749877
SNP_IGA_315837	3	7889958
SNP_IGA_315904	3	7903220
SNP_IGA_316025	3	7938854
SNP_IGA_316047	3	7943434
SNP_IGA_316301	3	8010393
SNP_IGA_316315	3	8025771
SNP_IGA_316615	3	8145641
SNP_IGA_316877	3	8194489
snp_3_7344624	3	8204420
SNP_IGA_317001	3	8214876
SNP_IGA_317114	3	8230912
SNP_IGA_317281	3	8258867
SNP_IGA_317307	3	8264353
SNP_IGA_317404	3	8281465
SNP_IGA_317767	3	8456152
SNP_IGA_317774	3	8456789
SNP_IGA_319280	3	8714889
SNP_IGA_319294	3	8716156
SNP_IGA_319344	3	8720269
SNP_IGA_320248	3	9077130
SNP_IGA_320761	3	9282024
SNP_IGA_322698	3	9911321
SNP_IGA_322702	3	9911351
SNP_IGA_322801	3	9916964
SNP_IGA_322925	3	9930816
SNP_IGA_324067	3	10189798
SNP_IGA_324340	3	10222618
SNP_IGA_434331	3	10773572
SNP_IGA_434231	3	10782351
Pp12Cl	3	10879473
SNP_IGA_433772	3	10880145
SNP_IGA_433760	3	10881026
SNP_IGA_433600	3	10890773
SNP_IGA_433596	3	10890870
SNP_IGA_433588	3	10891061
SNP_IGA_433575	3	10891448
SNP_IGA_433555	3	10891953
SNP_IGA_433302	3	10900061
SNP_IGA_433205	3	10908409
SNP_IGA_433197	3	10908868
SNP_IGA_433191	3	10909597
SNP_IGA_433063	3	10925646
SNP_IGA_433059	3	10925749
SNP_IGA_433050	3	10926063
SNP_IGA_433045	3	10926129
SNP_IGA_433036	3	10926370
SNP_IGA_432632	3	10952105
SNP_IGA_432536	3	10957370
SNP_IGA_432422	3	10964527
SNP_IGA_432304	3	10977128
SNP_IGA_432210	3	11016243
SNP_IGA_431468	3	11209305
SNP_IGA_431437	3	11211896
SNP_IGA_429668	3	11504891
SNP_IGA_429299	3	11564178
SNP_IGA_429127	3	11610241
SNP_IGA_428088	3	11872272
SNP_IGA_428056	3	11876389
SNP_IGA_428047	3	11880354
SNP_IGA_913769	3	12526639
SNP_IGA_916433	3	12905117
SNP_IGA_894039	3	13664157
SNP_IGA_325166	3	15430887
SNP_IGA_325305	3	15446050
SNP_IGA_325427	3	15451538
SNP_IGA_325433	3	15452000
SNP_IGA_327678	3	15675561
SNP_IGA_328607	3	15912019
SNP_IGA_330713	3	16195795
SNP_IGA_330725	3	16198112
SNP_IGA_330917	3	16236799
SNP_IGA_338533	3	17394493
SNP_IGA_338615	3	17411354
SNP_IGA_339037	3	17449378
SNP_IGA_339170	3	17455218
SNP_IGA_339178	3	17456131
SNP_IGA_339568	3	17534780
SNP_IGA_339586	3	17546326
SNP_IGA_339719	3	17569078
SNP_IGA_340016	3	17598599
SNP_IGA_340919	3	17707725
SNP_IGA_341962	3	18179421
snp_3_12878608	3	18221847
SNP_IGA_343288	3	18666687
SNP_IGA_343311	3	18669458
SNP_IGA_343432	3	18681162
SNP_IGA_343501	3	18693355
SNP_IGA_343872	3	18782863
SNP_IGA_344064	3	18831134
Pp19Cl	3	18847472
SNP_IGA_344612	3	19098840
SNP_IGA_344628	3	19101956
SNP_IGA_344712	3	19158086
SNP_IGA_344755	3	19180727
SNP_IGA_344789	3	19234280
SNP_IGA_345419	3	19310469
SNP_IGA_345436	3	19311112
SNP_IGA_345666	3	19349654
SNP_IGA_345700	3	19365471
SNP_IGA_345704	3	19365522
SNP_IGA_345797	3	19379124
SNP_IGA_345809	3	19379729
SNP_IGA_346164	3	19471832
SNP_IGA_346196	3	19476844
SNP_IGA_346432	3	19526247
SNP_IGA_346440	3	19528055
SNP_IGA_346608	3	19570000
SNP_IGA_346651	3	19577183
SNP_IGA_346745	3	19614789
SNP_IGA_347013	3	19639098
SNP_IGA_347158	3	19657793
SNP_IGA_347293	3	19689494
SNP_IGA_347325	3	19691905
SNP_IGA_347331	3	19691971
SNP_IGA_347402	3	19696519
SNP_IGA_347459	3	19725056
SNP_IGA_347468	3	19725332
SNP_IGA_347580	3	19729171
SNP_IGA_347646	3	19745200
SNP_IGA_347792	3	19779044
SNP_IGA_347807	3	19779612
SNP_IGA_347845	3	19790364
SNP_IGA_347862	3	19791748
SNP_IGA_347906	3	19798324
SNP_IGA_347911	3	19799101
SNP_IGA_348084	3	19868304
SNP_IGA_348418	3	19996497
SNP_IGA_348533	3	20004089
SNP_IGA_349097	3	20241224
SNP_IGA_349233	3	20300608
SNP_IGA_349682	3	20389527
SNP_IGA_349707	3	20422232
SNP_IGA_349757	3	20430729
SNP_IGA_349831	3	20473077
SNP_IGA_349861	3	20479030
SNP_IGA_350137	3	20574302
SNP_IGA_350280	3	20659407
SNP_IGA_350328	3	20688433
SNP_IGA_350488	3	20699393
SNP_IGA_350620	3	20710440
SNP_IGA_350827	3	20790422
SNP_IGA_350842	3	20792283
SNP_IGA_350909	3	20817996
SNP_IGA_351038	3	20861373
SNP_IGA_351542	3	20938726
SNP_IGA_351548	3	20939955
SNP_IGA_351567	3	20941614
SNP_IGA_351612	3	20960378
SNP_IGA_352618	3	21435411
SNP_IGA_352749	3	21455715
SNP_IGA_352789	3	21462203
SNP_IGA_352841	3	21480491
SNP_IGA_352942	3	21504956
SNP_IGA_353088	3	21530438
SNP_IGA_353324	3	21569239
SNP_IGA_353328	3	21570009
SNP_IGA_353369	3	21574569
SNP_IGA_353395	3	21591154
SNP_IGA_353457	3	21609438
SNP_IGA_353556	3	21637789
SNP_IGA_353674	3	21694223
SNP_IGA_353861	3	21710009
SNP_IGA_353937	3	21719670
SNP_IGA_354000	3	21738585
SNP_IGA_354028	3	21741954
SNP_IGA_354229	3	21790295
SNP_IGA_354647	3	22001863
SNP_IGA_354802	3	22082341
SNP_IGA_354950	3	22093557
SNP_IGA_354980	3	22098605
SNP_IGA_355382	3	22125126
SNP_IGA_355498	3	22144613
SNP_IGA_355590	3	22185909
SNP_IGA_355801	3	22245528
SNP_IGA_355814	3	22257373
SNP_IGA_355981	3	22267954
SNP_IGA_356128	3	22276102
SNP_IGA_356344	3	22328362
SNP_IGA_356407	3	22345881
SNP_IGA_356442	3	22363154
SNP_IGA_356469	3	22374219
SNP_IGA_356484	3	22378606
SNP_IGA_356701	3	22403170
SNP_IGA_356713	3	22404772
SNP_IGA_356767	3	22437217
SNP_IGA_356864	3	22453019
SNP_IGA_356939	3	22463349
SNP_IGA_356947	3	22463867
SNP_IGA_357156	3	22567250
SNP_IGA_357169	3	22568098
SNP_IGA_357326	3	22608995
SNP_IGA_357335	3	22609126
SNP_IGA_357353	3	22609504
SNP_IGA_357381	3	22611495
SNP_IGA_357396	3	22613528
SNP_IGA_357409	3	22614343
SNP_IGA_357415	3	22614598
SNP_IGA_357423	3	22629773
SNP_IGA_357931	3	22722513
SNP_IGA_358033	3	22748202
SNP_IGA_358339	3	22856957
SNP_IGA_358419	3	22886477
SNP_IGA_358448	3	22899346
SNP_IGA_358498	3	22908728
snp_scaffold_3_17617694	3	22960356
SNP_IGA_358726	3	23020670
SNP_IGA_358781	3	23028795
snp_scaffold_3_17724051	3	23066713
SNP_IGA_358948	3	23103799
SNP_IGA_359035	3	23125167
SNP_IGA_359261	3	23236828
SNP_IGA_359447	3	23305031
SNP_IGA_359462	3	23313820
SNP_IGA_359875	3	23531813
SNP_IGA_359881	3	23533116
SNP_IGA_360734	3	23777072
SNP_IGA_360916	3	23876039
SNP_IGA_361247	3	24009584
SNP_IGA_361595	3	24098416
SNP_IGA_362571	3	24730776
SNP_IGA_362723	3	24744467
SNP_IGA_363060	3	24891500
SNP_IGA_363081	3	24898379
SNP_IGA_363089	3	24899277
SNP_IGA_363203	3	24940260
SNP_IGA_363408	3	25009525
SNP_IGA_363595	3	25062868
SNP_IGA_363732	3	25105201
SNP_IGA_363920	3	25177624
SNP_IGA_364036	3	25258726
SNP_IGA_364066	3	25278056
SNP_IGA_364100	3	25296052
SNP_IGA_364119	3	25302232
SNP_IGA_364138	3	25313742
SNP_IGA_364330	3	25359487
SNP_IGA_364370	3	25368982
SNP_IGA_364441	3	25426981
SNP_IGA_364502	3	25438785
SNP_IGA_364517	3	25440837
SNP_IGA_364562	3	25448805
SNP_IGA_364601	3	25457488
SNP_IGA_364777	3	25532580
SNP_IGA_364833	3	25554013
SNP_IGA_364978	3	25596377
SNP_IGA_365048	3	25620660
SNP_IGA_365146	3	25650703
SNP_IGA_365173	3	25654287
SNP_IGA_365180	3	25655025
SNP_IGA_365200	3	25658134
SNP_IGA_365357	3	25768590
SNP_IGA_365389	3	25779077
SNP_IGA_365455	3	25817589
SNP_IGA_365485	3	25829460
SNP_IGA_365557	3	25854881
SNP_IGA_365647	3	25879794
SNP_IGA_365780	3	25978457
SNP_IGA_365854	3	26030677
SNP_IGA_365933	3	26061895
SNP_IGA_366041	3	26092752
SNP_IGA_366141	3	26109846
SNP_IGA_366151	3	26111164
SNP_IGA_366158	3	26117225
SNP_IGA_366194	3	26140317
SNP_IGA_366233	3	26195619
SNP_IGA_366354	3	26258949
SNP_IGA_366432	3	26305727
SNP_IGA_366639	3	26378711
SNP_IGA_366997	3	26642299
SNP_IGA_367214	3	26849962
SNP_IGA_367325	3	26894937
SNP_IGA_367351	3	26896749
SNP_IGA_367359	3	26898275
SNP_IGA_367365	3	26898684
SNP_IGA_367373	3	26904500
SNP_IGA_367533	3	26997210
SNP_IGA_367604	3	27028967
SNP_IGA_367668	3	27096339
SNP_IGA_367684	3	27106808
SNP_IGA_367728	3	27140481
SNP_IGA_367738	3	27150922
SNP_IGA_367844	3	27222414
snp_3_21905073	3	27247536
SNP_IGA_368077	3	27310139
SNP_IGA_368627	4	117381
SNP_IGA_368650	4	140435
SNP_IGA_368724	4	226925
SNP_IGA_368926	4	407324
SNP_IGA_369001	4	441934
SNP_IGA_369261	4	492102
SNP_IGA_369531	4	536049
SNP_IGA_369675	4	549735
SNP_IGA_369889	4	574755
SNP_IGA_370194	4	607467
SNP_IGA_370266	4	614901
SNP_IGA_370357	4	625744
SNP_IGA_370445	4	631368
SNP_IGA_370454	4	632023
SNP_IGA_370513	4	637666
SNP_IGA_370540	4	639721
SNP_IGA_370547	4	640170
SNP_IGA_370553	4	640827
SNP_IGA_370575	4	643522
SNP_IGA_370640	4	649614
SNP_IGA_370703	4	652776
SNP_IGA_370729	4	655042
SNP_IGA_370744	4	657214
SNP_IGA_370755	4	657576
SNP_IGA_370997	4	674124
SNP_IGA_371134	4	682354
SNP_IGA_371231	4	689184
SNP_IGA_371270	4	692341
SNP_IGA_371303	4	695615
SNP_IGA_371399	4	713692
SNP_IGA_371476	4	719561
SNP_IGA_371511	4	722284
SNP_IGA_371588	4	729137
SNP_IGA_371627	4	732728
SNP_IGA_371680	4	738673
SNP_IGA_371825	4	759147
SNP_IGA_371870	4	763633
SNP_IGA_371955	4	771316
SNP_IGA_371966	4	772552
SNP_IGA_372014	4	776580
SNP_IGA_372155	4	785122
SNP_IGA_372171	4	786517
SNP_IGA_372220	4	789536
SNP_IGA_372238	4	791697
SNP_IGA_372258	4	793790
SNP_IGA_372276	4	795068
SNP_IGA_372281	4	795263
SNP_IGA_372286	4	795607
SNP_IGA_372291	4	795826
SNP_IGA_372303	4	796716
SNP_IGA_372337	4	800212
SNP_IGA_372489	4	807345
SNP_IGA_372556	4	809526
SNP_IGA_372679	4	814313
SNP_IGA_372684	4	814598
SNP_IGA_372703	4	816357
SNP_IGA_372791	4	822655
SNP_IGA_372801	4	824472
SNP_IGA_372881	4	829727
SNP_IGA_372899	4	830932
SNP_IGA_373170	4	847811
SNP_IGA_373262	4	854849
SNP_IGA_373296	4	857651
SNP_IGA_373301	4	857894
SNP_IGA_373394	4	865823
SNP_IGA_373403	4	866941
SNP_IGA_373439	4	871920
SNP_IGA_373457	4	873186
SNP_IGA_373482	4	874691
SNP_IGA_373489	4	874928
SNP_IGA_373500	4	875633
SNP_IGA_373538	4	877079
SNP_IGA_373564	4	878875
SNP_IGA_373569	4	879226
SNP_IGA_373595	4	883332
SNP_IGA_373806	4	916204
SNP_IGA_374121	4	937311
SNP_IGA_374152	4	939658
SNP_IGA_374185	4	941970
SNP_IGA_374190	4	942541
SNP_IGA_374407	4	973935
SNP_IGA_374412	4	974712
SNP_IGA_374434	4	977306
SNP_IGA_374447	4	979351
SNP_IGA_374460	4	980904
SNP_IGA_374466	4	981900
SNP_IGA_374524	4	986584
SNP_IGA_374530	4	988135
SNP_IGA_374610	4	994306
SNP_IGA_374630	4	995992
SNP_IGA_374647	4	998704
SNP_IGA_374724	4	1005253
SNP_IGA_374931	4	1022738
SNP_IGA_375010	4	1030216
SNP_IGA_375045	4	1032591
SNP_IGA_375054	4	1033347
SNP_IGA_375067	4	1034038
SNP_IGA_375076	4	1034357
SNP_IGA_375133	4	1038905
SNP_IGA_375163	4	1040808
SNP_IGA_375224	4	1043599
SNP_IGA_375263	4	1046211
SNP_IGA_375338	4	1054922
SNP_IGA_375390	4	1057646
SNP_IGA_375442	4	1060975
SNP_IGA_375447	4	1061269
SNP_IGA_375451	4	1061452
SNP_IGA_375505	4	1065870
SNP_IGA_375539	4	1071434
SNP_IGA_375637	4	1080649
SNP_IGA_375678	4	1085566
SNP_IGA_375685	4	1086412
SNP_IGA_375716	4	1088609
SNP_IGA_375754	4	1091690
SNP_IGA_375759	4	1092141
SNP_IGA_375785	4	1094708
SNP_IGA_375799	4	1096965
SNP_IGA_375846	4	1102638
SNP_IGA_375917	4	1117073
SNP_IGA_375991	4	1128234
SNP_IGA_376004	4	1129356
SNP_IGA_376017	4	1130914
SNP_IGA_376040	4	1133528
SNP_IGA_376064	4	1136660
SNP_IGA_376104	4	1142055
SNP_IGA_376139	4	1146301
SNP_IGA_376155	4	1148318
SNP_IGA_376160	4	1148929
SNP_IGA_376220	4	1153320
SNP_IGA_376238	4	1154423
SNP_IGA_376344	4	1158809
SNP_IGA_376396	4	1163002
SNP_IGA_376402	4	1163860
SNP_IGA_376489	4	1171556
SNP_IGA_376494	4	1172646
SNP_IGA_376579	4	1180060
SNP_IGA_376672	4	1188596
SNP_IGA_376713	4	1192373
SNP_IGA_376761	4	1196075
SNP_IGA_376771	4	1197033
SNP_IGA_376816	4	1198856
SNP_IGA_376863	4	1201936
SNP_IGA_376869	4	1202464
SNP_IGA_376885	4	1203398
SNP_IGA_376892	4	1204472
SNP_IGA_376934	4	1208368
SNP_IGA_377064	4	1218805
SNP_IGA_377105	4	1223353
SNP_IGA_377137	4	1226164
SNP_IGA_377182	4	1229324
SNP_IGA_377282	4	1236864
SNP_IGA_377289	4	1237597
SNP_IGA_377314	4	1239868
SNP_IGA_377439	4	1251011
SNP_IGA_377465	4	1253062
SNP_IGA_377470	4	1253404
SNP_IGA_377492	4	1255399
SNP_IGA_377523	4	1258568
SNP_IGA_377553	4	1260788
SNP_IGA_377559	4	1261108
SNP_IGA_377566	4	1261271
SNP_IGA_377577	4	1262571
SNP_IGA_377595	4	1264497
SNP_IGA_377604	4	1265595
SNP_IGA_377615	4	1266883
SNP_IGA_377650	4	1268963
SNP_IGA_377675	4	1270990
SNP_IGA_377711	4	1274689
SNP_IGA_377808	4	1283111
SNP_IGA_377815	4	1283312
SNP_IGA_377820	4	1283392
SNP_IGA_377828	4	1283516
SNP_IGA_377847	4	1284662
SNP_IGA_377862	4	1285587
SNP_IGA_377868	4	1285655
SNP_IGA_378727	4	1340282
SNP_IGA_378731	4	1340472
SNP_IGA_378753	4	1341451
SNP_IGA_378805	4	1344776
SNP_IGA_378809	4	1345140
SNP_IGA_378819	4	1346370
SNP_IGA_378876	4	1350709
SNP_IGA_378885	4	1351809
SNP_IGA_378894	4	1353397
SNP_IGA_378949	4	1358387
SNP_IGA_378966	4	1360400
SNP_IGA_378981	4	1361617
SNP_IGA_379061	4	1366228
SNP_IGA_379179	4	1378865
SNP_IGA_379244	4	1382161
SNP_IGA_379278	4	1384614
SNP_IGA_379284	4	1385107
SNP_IGA_379314	4	1387089
SNP_IGA_379387	4	1390856
SNP_IGA_379393	4	1391180
SNP_IGA_379402	4	1391971
SNP_IGA_379411	4	1392744
SNP_IGA_379586	4	1401558
SNP_IGA_379611	4	1403695
SNP_IGA_379622	4	1405799
SNP_IGA_379643	4	1408778
SNP_IGA_379653	4	1409919
SNP_IGA_379693	4	1413701
SNP_IGA_379704	4	1414767
SNP_IGA_379710	4	1415435
SNP_IGA_379793	4	1420791
SNP_IGA_379800	4	1421458
SNP_IGA_379856	4	1477791
SNP_IGA_379876	4	1488220
SNP_IGA_380079	4	1518750
SNP_IGA_380096	4	1520868
SNP_IGA_380235	4	1549571
SNP_IGA_380288	4	1594170
SNP_IGA_380323	4	1615830
SNP_IGA_380358	4	1618622
SNP_IGA_381287	4	2299587
SNP_IGA_381379	4	2337294
SNP_IGA_381452	4	2378235
SNP_IGA_381465	4	2380301
SNP_IGA_381543	4	2417376
SNP_IGA_381612	4	2438391
SNP_IGA_381967	4	2526785
SNP_IGA_382003	4	2535773
SNP_IGA_382215	4	2635369
SNP_IGA_382355	4	2687245
SNP_IGA_382368	4	2689336
SNP_IGA_382420	4	2701425
SNP_IGA_382456	4	2704659
SNP_IGA_382502	4	2711365
SNP_IGA_382599	4	2751874
SNP_IGA_382677	4	2771095
SNP_IGA_382868	4	2831199
SNP_IGA_383043	4	2889610
SNP_IGA_383080	4	2900231
SNP_IGA_383357	4	3011121
SNP_IGA_383427	4	3042273
SNP_IGA_383699	4	3107210
SNP_IGA_383740	4	3138044
SNP_IGA_383778	4	3154826
SNP_IGA_384244	4	3288552
SNP_IGA_384554	4	3410071
SNP_IGA_384604	4	3436488
SNP_IGA_384731	4	3485677
SNP_IGA_384791	4	3513875
SNP_IGA_385004	4	3632015
SNP_IGA_385030	4	3664121
SNP_IGA_385070	4	3671074
SNP_IGA_385181	4	3753073
SNP_IGA_385189	4	3757530
SNP_IGA_385272	4	3790454
SNP_IGA_385293	4	3804173
SNP_IGA_385357	4	3821761
SNP_IGA_385377	4	3827872
SNP_IGA_385899	4	3966676
SNP_IGA_386060	4	4021536
SNP_IGA_386089	4	4024232
SNP_IGA_386222	4	4045426
SNP_IGA_386286	4	4056543
SNP_IGA_386533	4	4181083
SNP_IGA_386560	4	4197626
SNP_IGA_386583	4	4205838
SNP_IGA_386634	4	4219963
SNP_IGA_386692	4	4265485
SNP_IGA_386778	4	4306535
SNP_IGA_386970	4	4410096
SNP_IGA_387021	4	4473459
SNP_IGA_387198	4	4523417
SNP_IGA_387239	4	4533174
SNP_IGA_387302	4	4540178
SNP_IGA_387415	4	4586686
SNP_IGA_387459	4	4594581
SNP_IGA_387584	4	4601159
SNP_IGA_387593	4	4602454
SNP_IGA_387598	4	4602593
SNP_IGA_388960	4	4803773
SNP_IGA_389048	4	4814295
SNP_IGA_389082	4	4821157
SNP_IGA_389204	4	4843247
SNP_IGA_389208	4	4843709
SNP_IGA_394859	4	5449812
SNP_IGA_394780	4	5464700
SNP_IGA_394713	4	5478234
SNP_IGA_394698	4	5481593
SNP_IGA_394615	4	5489813
SNP_IGA_394608	4	5490614
SNP_IGA_394575	4	5494442
SNP_IGA_394550	4	5498481
SNP_IGA_394410	4	5506578
SNP_IGA_394034	4	5642071
SNP_IGA_394026	4	5645734
SNP_IGA_394015	4	5649369
SNP_IGA_393777	4	5708791
SNP_IGA_393759	4	5723223
SNP_IGA_393752	4	5727672
SNP_IGA_393740	4	5732173
SNP_IGA_393735	4	5733633
SNP_IGA_393060	4	5819636
SNP_IGA_392956	4	5824198
SNP_IGA_392950	4	5824755
SNP_IGA_392560	4	5862401
SNP_IGA_392549	4	5864055
SNP_IGA_392481	4	5872479
SNP_IGA_392387	4	5889972
SNP_IGA_392288	4	5916267
SNP_IGA_392245	4	5933300
SNP_IGA_392239	4	5934353
SNP_IGA_392232	4	5935544
SNP_IGA_392228	4	5936342
SNP_IGA_392186	4	5942181
SNP_IGA_392147	4	5950616
SNP_IGA_391818	4	5991455
SNP_IGA_391799	4	5993122
SNP_IGA_391629	4	6010605
SNP_IGA_391620	4	6012055
SNP_IGA_391543	4	6021326
SNP_IGA_395202	4	6168557
SNP_IGA_395253	4	6202308
SNP_IGA_395529	4	6259367
SNP_IGA_396028	4	6321967
SNP_IGA_396034	4	6322184
snp_scaffold_4_6329076	4	6329045
SNP_IGA_396171	4	6329439
SNP_IGA_396177	4	6329607
SNP_IGA_396252	4	6331162
SNP_IGA_396308	4	6333438
SNP_IGA_396345	4	6334272
SNP_IGA_396351	4	6334389
SNP_IGA_396385	4	6335288
SNP_IGA_396439	4	6338941
SNP_IGA_396443	4	6339310
snp_scaffold_4_6390855	4	6390824
SNP_IGA_396770	4	6396639
SNP_IGA_396804	4	6407679
SNP_IGA_396820	4	6416547
SNP_IGA_397228	4	6541340
SNP_IGA_397280	4	6556594
SNP_IGA_397323	4	6582903
SNP_IGA_397391	4	6609755
SNP_IGA_397470	4	6624729
SNP_IGA_397696	4	6688718
SNP_IGA_397710	4	6694626
SNP_IGA_397732	4	6698690
SNP_IGA_397802	4	6712809
Pp17Cl	4	6739305
SNP_IGA_398075	4	6849424
SNP_IGA_398228	4	6900408
SNP_IGA_398245	4	6901340
SNP_IGA_398368	4	6933629
SNP_IGA_398634	4	6969104
SNP_IGA_398915	4	7022020
SNP_IGA_398997	4	7034829
SNP_IGA_399237	4	7072285
SNP_IGA_399280	4	7078191
SNP_IGA_399292	4	7079406
SNP_IGA_399330	4	7089896
SNP_IGA_399337	4	7090720
SNP_IGA_399565	4	7135592
SNP_IGA_399569	4	7136087
SNP_IGA_399599	4	7144391
SNP_IGA_399658	4	7148600
SNP_IGA_399756	4	7156172
SNP_IGA_399812	4	7158923
SNP_IGA_399849	4	7161033
SNP_IGA_399858	4	7161945
SNP_IGA_399868	4	7163184
SNP_IGA_400090	4	7219399
SNP_IGA_400126	4	7227689
SNP_IGA_400260	4	7244980
SNP_IGA_400359	4	7258281
SNP_IGA_400506	4	7299574
SNP_IGA_400521	4	7309346
SNP_IGA_400572	4	7323849
SNP_IGA_400613	4	7332837
SNP_IGA_400661	4	7361767
SNP_IGA_400774	4	7401493
SNP_IGA_400811	4	7407878
Pp10Cl	4	7412311
SNP_IGA_400858	4	7413838
SNP_IGA_400907	4	7476382
SNP_IGA_400954	4	7496336
SNP_IGA_400963	4	7499061
SNP_IGA_401072	4	7536942
SNP_IGA_401089	4	7539889
SNP_IGA_401100	4	7541276
SNP_IGA_402256	4	8371579
SNP_IGA_402302	4	8444834
SNP_IGA_402375	4	8494031
SNP_IGA_402404	4	8547997
SNP_IGA_402416	4	8549074
SNP_IGA_402456	4	8560231
SNP_IGA_402569	4	8581271
SNP_IGA_402724	4	8686203
SNP_IGA_402745	4	8724897
SNP_IGA_402793	4	8762916
SNP_IGA_403004	4	8844938
SNP_IGA_403152	4	8977975
SNP_IGA_403613	4	9052116
SNP_IGA_403727	4	9103325
SNP_IGA_403741	4	9106604
SNP_IGA_403935	4	9184119
SNP_IGA_404010	4	9210549
SNP_IGA_404059	4	9220854
SNP_IGA_404165	4	9250943
SNP_IGA_404324	4	9290381
SNP_IGA_404332	4	9290496
SNP_IGA_404405	4	9299374
SNP_IGA_404413	4	9300068
SNP_IGA_404442	4	9321093
SNP_IGA_404570	4	9407539
SNP_IGA_404899	4	9443863
SNP_IGA_404905	4	9444028
SNP_IGA_404914	4	9444547
SNP_IGA_404921	4	9444980
SNP_IGA_405044	4	9475147
SNP_IGA_405055	4	9478484
SNP_IGA_405065	4	9478616
SNP_IGA_405554	4	9617585
SNP_IGA_405596	4	9626132
SNP_IGA_405623	4	9640313
SNP_IGA_405628	4	9640863
SNP_IGA_405673	4	9647311
SNP_IGA_406331	4	9834227
SNP_IGA_406345	4	9834841
SNP_IGA_406350	4	9834926
SNP_IGA_406841	4	9900493
SNP_IGA_406846	4	9900651
SNP_IGA_406862	4	9901076
SNP_IGA_407364	4	10015773
SNP_IGA_407812	4	10037702
SNP_IGA_407900	4	10051308
[truncated: 2,007 more rows]

## Sheet: S3_Table
Table S3. Pearson correlation between the 14 traits and years (2010, 2011 and 2012)
	BD_2011	BD_2012	RD_2010	RD_2011	RD_2012	DAB_2011	DAB_2012	Blush_2010	Blush_2011	Blush_2012	FDIA_2011	FDIA_2012	FW_2010	FW_2011	FW_2012	ADH_2010	ADH_2011	ADH_2012	FF_2010	FF_2011	FF_2012	RP_2010	RP_2011	RP_2012	FT_2010	FT_2011	FT_2012	PW_2010	PW_2011	PW_2012	SSC_2010	SSC_2011	SSC_2012	TA_2011	TA_2012	pH_2010	pH_2011	pH_2012
BD_2011		1.0734e-166	0.60601	1.8899e-23	6.7549e-24	0.14184	0.0030017	0.67112	2.6866e-08	0.015609	0.04881	0.049457	0.17088	0.22195	0.42636	0.0025276	1.907e-10	4.5428e-12	0.25073	7.8073e-07	6.623e-33	1.8451e-05	9.1522e-05	2.504e-13	9.2221e-07	1.807e-24	1.9807e-20	0.036007	0.06521	0.97265	0.020278	5.483e-18	3.4181e-25	4.5062e-05	9.9623e-06	0.4421	0.76432	0.33248
BD_2012	0.99073		0.053787	3.4886e-38	1.5765e-53	0.12432	7.0877e-05	0.031934	0.0066564	0.91223	0.00029799	0.0012508	0.15389	0.34416	0.00013565	0.63007	1.9116e-32	3.6175e-32	0.44045	5.299e-18	9.839e-23	0.51819	6.2058e-14	4.6898e-34	0.92151	3.3985e-15	1.663e-05	0.66097	1.8839e-09	0.00039238	0.11053	6.2909e-09	3.1152e-09	6.1598e-05	0.00048182	0.73317	0.18129	0.012888
RD_2010	-0.069779	0.24818		2.18e-22	1.2792e-21	2.5226e-22	2.2891e-15	0.63371	0.5108	0.18476	0.90627	0.10224	0.83413	0.83627	0.49606	1.0952e-05	9.4209e-05	0.72174	0.060668	0.019493	0.00020079	1.7861e-06	2.3753e-10	0.095523	0.0043131	0.37226	0.13074	0.016794	0.58617	0.53096	0.80423	0.26022	0.00017635	0.17363	0.18522	0.82121	0.96617	0.17965
RD_2011	0.66505	0.60679	0.70203		5.4221e-159	1.1128e-42	1.0835e-74	0.0004531	0.09185	2.8049e-10	0.0027694	1.238e-05	0.73385	0.083453	0.013267	3.2501e-08	8.5498e-26	1.2302e-25	5.7115e-06	0.00037513	1.0212e-39	4.2166e-06	9.4424e-40	1.0157e-38	0.08345	3.9504e-10	8.8171e-05	0.21465	4.6812e-08	0.27084	0.04789	3.6962e-24	3.7414e-19	0.0094489	0.82949	0.00075892	1.1003e-07	0.11752
RD_2012	0.64165	0.64639	0.82605	0.92029		2.1932e-30	2.5413e-138	0.34902	1.1589e-05	2.157e-13	0.010397	2.6374e-08	0.28574	0.29006	2.7835e-05	3.7894e-09	1.596e-25	1.0046e-36	0.0045119	0.0034293	3.7325e-33	0.0061203	3.872e-31	1.5692e-55	0.060718	1.9667e-12	0.00067205	0.022221	2.6499e-07	0.0021656	0.080486	5.9087e-16	1.1393e-18	0.037607	0.75746	0.052939	5.3567e-05	3.2872e-05
DAB_2011	0.11215	0.1194	0.90709	0.81667	0.73989		3.8614e-41	0.018559	0.28046	0.001523	0.02591	2.2388e-05	0.15929	2.4965e-08	0.25431	2.7545e-06	1.2778e-12	2.4294e-12	0.0011176	0.60331	0.00029043	0.39358	1.5292e-15	3.5892e-12	0.80405	1.1643e-05	0.0012524	0.13792	0.79246	0.7893	0.063344	0.061585	3.448e-06	0.027394	0.27267	0.013031	0.010351	0.41105
DAB_2012	0.21476	0.18826	0.82288	0.78073	0.8725	0.81884		0.010102	1.5664e-11	1.5676e-25	0.0089109	6.8226e-06	0.031515	0.96875	0.0097254	1.9366e-09	1.364e-09	1.798e-18	0.011046	0.7698	6.5022e-17	0.021549	6.1669e-22	1.4626e-32	0.062375	4.1354e-05	0.1883	0.0031514	0.00060589	0.035464	0.24795	1.1301e-12	2.3882e-13	0.84555	0.0035187	0.097278	7.2163e-05	0.00010297
Blush_2010	0.055952	-0.2685	0.039763	0.28756	-0.10222	-0.30312	-0.32701		1.8122e-32	0.00024207	0.033435	0.20097	0.040884	0.74856	0.031067	0.13843	0.17699	0.76482	0.057275	0.021967	0.0049111	5.1997e-06	2.7467e-06	0.13364	0.71009	0.000837	9.1723e-06	0.79357	0.010796	0.002476	0.016241	2.4743e-08	0.00073901	0.55883	0.2417	0.6724	0.60196	0.015191
Blush_2011	0.40945	0.13935	0.055833	-0.077929	-0.21758	-0.083002	-0.34151	0.79215		2.8632e-22	0.95092	0.024842	0.061731	0.012566	0.0009276	0.0010175	0.36866	0.62902	0.017014	0.1936	0.02224	7.7341e-08	0.0022597	0.08105	0.42189	1.3518e-06	1.2712e-08	0.76399	0.28097	0.001765	0.04528	0.11964	1.6464e-05	0.023706	0.029676	0.58461	0.2711	5.5493e-08
Blush_2012	0.1734	0.0052521	0.14792	-0.31322	-0.32854	-0.24273	-0.46973	0.38599	0.45881		0.0084155	0.020004	0.0518	0.0012595	0.036845	0.78627	0.16649	0.004825	0.059351	0.18709	0.14427	0.096924	0.01566	0.019823	0.79328	0.0092225	0.0012188	0.22925	0.10638	0.0002578	0.8575	0.53455	0.95402	0.31939	0.00015293	0.20669	0.16682	1.9249e-05
FDIA_2011	0.39012	-0.24662	-0.013205	-0.17022	-0.16794	0.44474	-0.1827	-0.23517	0.0035213	0.17189		3.5288e-09	0.00036916	6.8952e-130	7.396e-08	0.098979	0.1091	0.70452	0.059813	0.050268	0.0072972	0.89391	0.28248	0.0060701	0.078509	0.032972	6.1409e-09	0.00057188	6.712e-19	0.8992	0.0020274	3.3202e-06	0.91693	0.10587	0.95731	1.1875e-06	0.46273	0.014564
FDIA_2012	0.25061	0.18366	0.31526	0.2669	0.29902	0.59855	0.25482	0.2446	-0.1353	-0.12725	0.37619		0.0029388	4.4774e-12	5.7468e-106	0.97754	0.096198	0.01374	0.78103	0.39596	0.40956	0.29611	0.0033535	5.3043e-06	0.69992	0.32491	0.53043	0.034323	0.34679	1.6669e-22	0.6568	0.028484	0.75996	0.010973	0.39748	0.025981	0.58158	0.52912
FW_2010	-0.17912	0.18033	-0.017603	0.028679	-0.11712	-0.18402	-0.27569	0.16887	0.15719	0.21168	0.38851	0.54122		3.2336e-06	9.9519e-07	0.013946	0.0028176	0.058319	0.27621	0.83649	0.67509	0.93414	0.86294	0.61903	0.28505	0.25232	0.3358	2.546e-22	0.00042539	0.64506	0.059723	0.53544	0.1183	0.1097	0.10887	0.057949	0.74578	0.25044
FW_2011	0.099975	0.051922	-0.017753	0.083186	0.056386	0.43445	-0.0021812	-0.027231	0.11944	0.17028	0.92213	0.43234	0.38315		3.2214e-08	0.14967	0.58918	0.055263	0.69276	0.017977	0.10722	0.18815	0.047526	0.6285	0.31701	7.8337e-07	2.6874e-12	0.00034461	6.0155e-15	0.582	0.14185	0.21979	0.00034101	2.0751e-06	0.21407	1.063e-05	0.0025219	1.9609e-07
FW_2012	-0.058196	0.18216	-0.076714	0.12661	0.19281	0.089521	0.12427	-0.23408	-0.16579	-0.09663	0.3436	0.87378	0.50445	0.28861		0.23358	0.00028744	0.00057567	0.34716	0.0018252	0.0042537	0.32039	9.7202e-05	2.6256e-08	0.44228	1.4433e-06	6.8616e-07	3.4626e-06	0.71048	6.1262e-43	0.80413	1.2736e-08	7.2635e-14	0.45203	0.82815	0.54011	0.4337	0.00027579
ADH_2010	0.38296	-0.060864	-0.35506	-0.43385	-0.58047	-0.56357	-0.67389	-0.12196	-0.2683	-0.029491	-0.17908	0.0053673	0.20241	-0.12025	0.1298		8.56e-62	2.2714e-05	0.29322	0.066807	0.0039348	1.747e-05	2.1681e-11	0.0095896	7.2475e-06	0.73528	0.16278	1.2548e-11	1.0214e-05	0.29109	0.54338	0.47186	0.0013514	0.011156	0.91435	0.29436	0.0021801	0.51773
ADH_2011	-0.4613	-0.56329	-0.32289	-0.45708	-0.49467	-0.50698	-0.3116	-0.11313	-0.041383	0.069929	0.091032	-0.10221	0.2489	-0.025873	-0.18337	0.92138		2.7984e-85	0.14506	1.5715e-14	0.1069	5.638e-05	7.2107e-31	1.7426e-27	1.7658e-08	0.75261	0.84687	3.7744e-10	2.3151e-14	0.67289	0.26455	0.94285	0.39657	0.24113	0.83773	0.31051	0.54616	0.0068646
ADH_2012	-0.47139	-0.52183	-0.039925	-0.49791	-0.53772	-0.50798	-0.40232	-0.032729	0.024227	0.12926	0.024974	-0.13492	0.2062	-0.10183	-0.15907	0.43741	0.79112		0.74473	1.1401e-12	0.026369	0.0063375	3.3916e-18	2.0174e-47	0.0002148	6.2083e-06	0.0038986	1.663e-06	3.2226e-08	0.22261	0.59581	0.98717	0.01568	0.020533	0.93903	0.7317	0.37529	0.11063
FF_2010	0.15326	-0.099758	0.15783	0.3716	0.30875	0.41732	0.32863	0.15826	0.20142	0.20786	-0.21138	0.055002	0.091026	-0.034059	-0.10514	0.087879	0.12379	0.036278		1.1778e-12	1.0664e-06	0.19588	0.16643	0.47487	0.0077367	3.4349e-05	0.037959	0.078283	0.37929	0.88481	0.7461	0.0010532	0.00013667	0.64313	0.45547	0.13719	0.34213	0.30098
FF_2011	-0.38339	-0.44635	0.19796	-0.16883	-0.15385	0.041923	0.016145	0.19215	0.062235	0.06959	-0.11507	-0.055747	0.0176	-0.11596	-0.1649	0.15265	0.35407	0.36324	0.55786		1.5403e-05	0.78554	3.6765e-05	2.5229e-09	0.0070185	0.0051602	0.24486	0.68024	0.0023321	0.58798	0.096322	0.13654	0.64816	0.00018094	0.070957	0.92605	0.61859	0.39191
FF_2012	0.72743	0.44818	0.40181	0.60571	0.51757	0.2778	0.38775	0.30239	0.11546	-0.067888	-0.17764	0.045897	-0.046407	0.086374	-0.13335	-0.30784	-0.082298	-0.10332	0.50864	0.22691		0.015712	0.0053836	1.485e-05	0.55273	8.4431e-28	4.2416e-16	0.10746	0.92066	0.5006	0.44911	5.8924e-31	3.1921e-37	0.0041007	0.080484	0.0057489	1.9246e-05	3.6147e-06
RP_2010	-0.52256	0.082251	0.38337	0.3715	0.29505	0.11215	0.29381	0.3635	0.4296	0.18124	0.014956	0.20468	0.0068747	0.11148	-0.10973	-0.34396	-0.32909	-0.29387	0.10803	0.023035	0.26284		2.7737e-27	0.26586	6.948e-07	0.84181	0.11053	0.024268	0.11348	0.00028366	0.023059	0.11618	0.030963	0.079125	0.24682	0.18658	0.099272	0.42655
RP_2011	0.29634	0.37785	0.5031	0.55957	0.54478	0.56342	0.47844	0.38059	0.14098	-0.12278	-0.061533	0.18025	-0.014668	0.09562	0.19834	-0.51943	-0.49786	-0.4231	0.11802	-0.19628	0.1427	0.75184		5.7084e-28	1.574e-06	0.84463	0.26719	0.0088795	5.0711e-08	0.0041389	0.19136	0.16278	0.20632	0.025886	0.94075	0.48122	0.015685	0.001524
RP_2012	0.49394	0.53473	0.18533	0.59627	0.6385	0.50325	0.52569	-0.16304	-0.087229	-0.10687	-0.17889	0.24617	-0.054701	0.02573	0.25395	-0.27628	-0.51065	-0.59915	-0.079517	-0.30713	0.19957	0.12204	0.51814		0.019257	7.651e-05	0.17735	0.035715	2.8356e-06	0.00016158	0.37469	0.06436	0.0065895	0.0013474	0.5005	0.51155	0.0088946	0.095544
FT_2010	0.5849	-0.012463	-0.23493	-0.14375	-0.2031	-0.03271	-0.23811	0.030705	-0.067441	-0.028672	0.19422	0.074761	0.088758	0.084567	0.08444	0.35714	0.44681	0.38894	0.22036	0.22453	0.065292	-0.39337	-0.38901	-0.25198		0.033974	0.88904	0.023531	0.0068573	0.0028672	0.036282	0.22104	0.34526	0.80225	0.4015	0.3523	0.45763	0.36128
FT_2011	0.64783	0.37196	-0.075707	0.28252	0.32748	0.32651	0.20126	0.27535	0.21734	0.12386	0.12116	0.056002	0.096693	0.23342	-0.22916	-0.028121	-0.014454	-0.2138	0.34253	0.13282	0.49369	0.016777	-0.0090536	0.18741	0.17623		1.8954e-108	0.93447	0.78097	8.7766e-07	0.032627	6.235e-28	4.6821e-57	5.0904e-08	0.0041887	1.3725e-06	1.3977e-05	1.631e-17
FT_2012	0.60094	0.20324	0.16827	0.19773	0.15582	0.24692	0.062908	0.45816	0.27934	0.14798	0.36851	0.034498	0.10567	0.35944	-0.2276	-0.15097	-0.0097721	-0.13248	0.22824	0.061362	0.36572	0.17434	-0.05654	0.062065	0.015267	0.82001		0.36155	0.57781	9.2071e-10	0.9887	4.5529e-19	5.4897e-46	1.6948e-06	0.019937	0.0099902	0.00030138	3.2443e-17
PW_2010	0.27361	0.05681	-0.20182	-0.10553	-0.25076	-0.19546	-0.37505	-0.022073	-0.025694	0.1334	0.38133	0.40864	0.70123	0.30249	0.48451	0.52781	0.49975	0.49801	0.14931	0.035525	-0.17907	-0.18836	-0.22198	-0.2309	0.18933	0.0070375	-0.10143		8.7362e-14	0.0019607	0.51779	0.6089	0.0031824	0.50527	0.97447	0.57019	0.30391	0.25727
PW_2011	-0.16348	-0.36294	-0.054535	-0.30603	-0.30596	-0.023484	-0.21455	-0.24785	-0.061625	0.09794	0.5962	-0.076075	0.34091	0.42701	0.022651	0.41229	0.41601	0.32689	0.088413	0.1737	-0.0060901	-0.15538	-0.30432	-0.27902	0.26236	-0.015856	0.033831	0.65684		0.00015535	0.82007	0.026072	0.15228	0.2171	0.69781	0.82384	0.10283	0.40838
PW_2012	-0.0024969	0.16885	0.070183	0.056404	0.14127	0.02096	0.10087	-0.32229	-0.15687	-0.16781	0.0083793	0.50371	0.050682	-0.029397	0.58083	0.11447	-0.021528	0.056483	-0.016146	-0.028768	-0.031516	-0.38417	0.14659	0.17334	0.31779	-0.23318	-0.27787	0.33504	0.22779		0.0027119	9.5987e-05	1.2946e-08	0.15256	0.19065	0.88193	0.049382	1.1047e-06
SSC_2010	0.31229	0.20993	-0.021214	0.16873	0.1966	0.2521	0.15554	-0.2014	-0.17135	0.020394	0.34005	-0.089578	-0.15897	0.12757	0.028349	-0.051419	-0.09598	0.060198	-0.027708	-0.14372	-0.086374	-0.19063	-0.11272	-0.10058	0.17589	0.18268	0.0016086	0.055518	0.023271	0.33096		0.0003148	0.45076	0.50036	0.7002	0.055209	0.46711	0.35779
SSC_2011	0.59558	0.29657	0.095448	0.44388	0.39426	0.14284	0.36283	0.44406	0.071961	-0.031502	-0.26181	-0.13484	0.052434	-0.059021	-0.28486	-0.059797	0.0033016	-0.00081683	0.274	0.071007	0.54337	0.13149	0.064626	0.093636	0.10225	0.47363	0.43045	0.043772	-0.12659	-0.19722	0.3033		6.1136e-48	0.074466	0.046043	0.0014608	1.6166e-05	3.2713e-06
SSC_2012	0.658	0.27893	0.40269	0.43392	0.3927	0.3504	0.34195	0.35705	0.21464	-0.0026724	0.0069459	0.016934	-0.1707	0.19012	-0.33941	-0.3383	-0.043158	-0.11188	0.40658	0.024198	0.54579	0.23422	0.064804	0.12543	-0.10301	0.66644	0.59461	-0.32005	-0.086875	-0.26042	0.085507	0.64993		1.6178e-06	0.044584	0.096266	3.2478e-06	4.4075e-23
TA_2011	-0.30844	-0.21041	0.11606	-0.12103	-0.10713	-0.16971	-0.010465	-0.049463	-0.1058	-0.05135	-0.093861	-0.15999	-0.13578	-0.22838	-0.039108	0.20949	0.054641	0.11927	-0.039787	0.17839	-0.14849	-0.14784	-0.10445	-0.1643	0.021125	-0.25037	-0.2433	0.057187	0.071349	0.074217	0.058277	-0.083249	-0.24471		1.885e-45	1.0219e-16	2.896e-47	9.6191e-27
TA_2012	-0.31442	-0.16782	-0.1487	0.011098	0.014437	0.08563	0.14077	-0.12836	-0.11026	-0.17564	-0.0036133	-0.047385	-0.1762	-0.067059	-0.010227	0.011769	0.010526	0.0035841	-0.083557	0.096366	-0.08194	-0.12775	0.0038513	-0.031489	-0.092167	-0.13848	-0.10861	0.0035887	0.023871	0.061462	-0.044002	-0.10241	-0.0938	0.64941		3.5953e-05	1.6718e-13	4.6736e-37
pH_2010	0.1048	0.044935	0.019341	0.28333	0.21721	0.32989	0.21984	0.03579	0.04711	0.1427	0.51515	0.43598	0.16007	0.3703	0.069958	-0.088608	-0.08728	-0.038931	0.12671	0.0080626	0.30804	0.11147	0.060903	0.07446	0.078629	0.39896	0.28647	0.048746	0.022776	0.016869	0.16183	0.26931	0.18725	-0.635	-0.44722		3.9596e-13	9.8184e-08
pH_2011	-0.026864	-0.080848	0.0036297	0.2679	0.23293	0.22678	0.24046	-0.044139	-0.056824	-0.080567	-0.046374	0.042185	0.027643	0.15494	-0.04583	-0.25169	-0.031055	-0.051717	0.081472	0.025687	0.24643	0.13889	0.12487	0.15182	-0.062601	0.22111	0.20863	-0.088148	-0.096999	-0.11434	0.062875	0.2198	0.26675	-0.65275	-0.41505	0.57091		4.8284e-17
pH_2012	0.088114	0.14715	-0.15058	-0.093257	-0.23134	-0.076378	-0.228	0.26258	0.3171	0.23788	0.18933	0.046308	0.12679	0.30383	-0.2039	-0.070699	0.16037	0.08992	0.11562	0.051087	0.25801	0.087902	-0.18892	-0.093932	0.10026	0.47737	0.45135	-0.12654	0.05418	-0.27003	-0.10485	0.27301	0.51789	-0.58506	-0.63642	0.55691	0.47412

## Sheet: S4_Table
Table S4. Broad-sense heritability of the 14 traits. BD - bloom date; RD - ripening date; DAB - days after bloom; blush; FDIA - fruit diameter; FW - fruit weight; ADH - adherence; FF - fruit firmness; RP - redness around pit; FT - fruit texture; PW - pit weight; SSC - soluble solid concentration; TA - titratable acidity.
Trait	H2
BD	0.77
RD	0.834778
DAB	0.743077
Blush	0.710618
FDIA	0.73398
FW	0.696024
FF	0.684203
ADH	0.766727
RP	0.69245
FT	0.762153
PW	0.698666
SSC	0.722281
TA	0.867523
pH	0.691037

## Sheet: S5_Table
Table S5. Significant QTNs detected using mrMLM 4.0 methods.
Trait name	Method	SNP	Scaffold	Position	QTN effect	LOD score	'-log10(P)'	r2 (%)	MAF
BD_2011	mrMLM	SNP_IGA_131557	1	45022954	14.1151	13.6209	14.6238	52.3727	0.1692
BD_2011	mrMLM	SNP_IGA_126857	1	46125525	11.7734	14.841	15.862	37.4376	0.1791
BD_2011	mrMLM	SNP_IGA_119391	1	40620294	5.7041	4.0088	4.7608	8.4896	0.194
BD_2011	FASTmrMLM	SNP_IGA_119391	1	40620294	4.0663	5.9314	6.7621	5.3073	0.1921
BD_2011	FASTmrMLM	SNP_IGA_131557	1	45022954	14.1715	18.0214	19.0834	64.9432	0.1675
BD_2011	FASTmrMLM	SNP_IGA_126857	1	46125525	8.6123	8.835	9.7475	24.6435	0.1773
BD_2011	FASTmrMLM	SNP_IGA_125029	1	47074731	3.0705	4.2055	4.967	3.0707	0.202
BD_2011	FASTmrEMMA	SNP_IGA_131557	1	45022954	38.7619	24.1822	25.3065	31.9317	0.1675
BD_2011	FASTmrEMMA	SNP_IGA_126857	1	46125525	22.3373	12.5784	13.5647	10.8951	0.1773
BD_2011	pLARmEB	SNP_IGA_111539	1	37242573	-0.6223	3.461	4.1841	0.0622	0.2192
BD_2011	pLARmEB	SNP_IGA_119391	1	40620294	3.1123	4.3197	5.0865	1.4091	0.1921
BD_2011	pLARmEB	SNP_IGA_131557	1	45022954	9.4678	11.7024	12.6735	13.1379	0.1675
BD_2011	pLARmEB	SNP_IGA_126857	1	46125525	4.8546	5.5244	6.3407	3.5489	0.1773
BD_2011	pLARmEB	SNP_IGA_387459	4	4594581	0.4897	3.2194	3.9283	0.0394	0.3202
BD_2011	pLARmEB	SNP_IGA_567794	5	5036544	1.6193	4.7545	5.5405	0.3755	0.1724
BD_2011	pLARmEB	SNP_IGA_569241	5	5176305	-3.1084	3.359	4.0762	0.2116	0.4828
BD_2011	pLARmEB	SNP_IGA_694098	6	27955072	2.2638	9.9834	10.9213	0.3765	0.069
BD_2011	pLARmEB	SNP_IGA_694348	6	28063589	-0.694	4.0774	4.8328	0.0789	0.234
BD_2011	pLARmEB	SNP_IGA_700552	6	29958721	-0.7814	3.3154	4.0301	0.0836	0.3547
BD_2011	pLARmEB	SNP_IGA_748301	7	7681010	0.9977	3.4684	4.1919	0.135	0.1749
BD_2011	pLARmEB	SNP_IGA_826441	8	5727158	6.4709	9.9643	10.9018	6.0447	0.1626
BD_2011	pKWmEB	SNP_IGA_84580	1	25541717	4.3574	3.2119	3.9204	10.8568	0.0224
BD_2011	pKWmEB	SNP_IGA_378731	4	1340472	-5.7514	26.6456	27.7906	32.498	0.3284
BD_2011	pKWmEB	SNP_IGA_759649	7	10525885	2.3723	4.562	5.3397	28.6899	0.1692
BD_2011	ISIS EM-BLASSO	SNP_IGA_2742	1	910113	0.9451	3.1122	3.8146	0.3101	0.4163
BD_2011	ISIS EM-BLASSO	SNP_IGA_86483	1	26444910	2.7685	3.3903	4.1093	0.4957	0.0246
BD_2011	ISIS EM-BLASSO	SNP_IGA_126124	1	46434126	3.3421	8.3528	9.2537	4.1755	0.2463
BD_2011	ISIS EM-BLASSO	SNP_IGA_204240	2	7155357	-2.4391	10.7716	11.7254	2.261	0.3103
BD_2011	ISIS EM-BLASSO	SNP_IGA_425934	4	14768290	-1.4134	3.356	4.073	0.6224	0.1429
BD_2011	ISIS EM-BLASSO	SNP_IGA_477336	4	19833919	-2.3755	6.8263	7.6857	1.8105	0.1675
BD_2011	ISIS EM-BLASSO	SNP_IGA_644920	6	12097067	6.192	8.4933	9.3977	1.6787	0.0197
BD_2012	mrMLM	SNP_IGA_128189	1	45753343	2.7545	11.1021	12.0622	6.3146	0.2775
BD_2012	mrMLM	SNP_IGA_134730	1	43578596	-1.7609	9.349	10.2733	2.4198	0.2192
BD_2012	mrMLM	SNP_IGA_327678	3	15675561	0.888	3.6094	4.3407	0.4738	0.4559
BD_2012	mrMLM	SNP_IGA_420316	4	13813285	3.2885	10.3009	11.2453	9.0405	0.3623
BD_2012	mrMLM	SNP_IGA_426443	4	14818664	-2.428	6.8424	7.7023	3.9631	0.1432
BD_2012	mrMLM	SNP_IGA_676161	6	22411000	-2.1487	6.3324	7.1764	1.7899	0.0683
BD_2012	mrMLM	SNP_IGA_779594	7	15842240	2.1499	11.5204	12.4882	3.4134	0.196
BD_2012	mrMLM	SNP_IGA_732429	7	5374461	1.0068	3.6779	4.4129	0.73	0.4604
BD_2012	mrMLM	SNP_IGA_796755	8	1011172	2.2734	4.6334	5.4142	4.0331	0.1894
BD_2012	FASTmrMLM	SNP_IGA_119391	1	40620294	2.2672	4.8773	5.6684	3.5211	0.1656
BD_2012	FASTmrMLM	SNP_IGA_134730	1	43578596	-1.0496	4.9008	5.6929	0.8597	0.2182
BD_2012	FASTmrMLM	SNP_IGA_128189	1	45753343	1.7978	3.7368	4.4749	2.6899	0.2763
BD_2012	FASTmrMLM	SNP_IGA_127181	1	46012310	1.9003	4.3666	5.1356	1.4577	0.0702
BD_2012	FASTmrMLM	SNP_IGA_327678	3	15675561	1.2185	7.0535	7.9196	0.8921	0.4572
BD_2012	FASTmrMLM	SNP_IGA_420316	4	13813285	1.3973	4.9211	5.714	1.6323	0.3607
BD_2012	FASTmrMLM	SNP_IGA_440662	4	16306919	1.8373	4.9366	5.7302	2.3736	0.2061
BD_2012	FASTmrMLM	SNP_IGA_676161	6	22411000	-1.9626	6.8576	7.7179	1.4932	0.068
BD_2012	FASTmrMLM	SNP_IGA_779594	7	15842240	1.6839	7.2962	8.1692	2.0941	0.1952
BD_2012	FASTmrMLM	SNP_IGA_796755	8	1011172	2.5957	8.2681	9.1669	5.2579	0.1886
BD_2012	FASTmrEMMA	SNP_IGA_118784	1	40352725	-2.0937	4.0592	4.8136	0.3644	0.3191
BD_2012	FASTmrEMMA	SNP_IGA_134730	1	43578596	-2.3591	5.4325	6.2454	0.4393	0.2182
BD_2012	FASTmrEMMA	SNP_IGA_128189	1	45753343	3.799	3.7639	4.5034	1.2755	0.2763
BD_2012	FASTmrEMMA	SNP_IGA_420362	4	13816498	2.6368	4.0858	4.8416	0.963	0.3596
BD_2012	FASTmrEMMA	SNP_IGA_440662	4	16306919	3.9032	5.0722	5.8712	1.4844	0.2061
BD_2012	FASTmrEMMA	SNP_IGA_717776	7	2339551	1.9627	4.9065	5.6989	0.3344	0.2884
BD_2012	FASTmrEMMA	SNP_IGA_779594	7	15842240	2.5017	3.3354	4.0512	0.4721	0.1952
BD_2012	pLARmEB	SNP_IGA_87689	1	26845540	0.7997	3.6426	4.3757	0.5082	0.2522
BD_2012	pLARmEB	SNP_IGA_118212	1	40085751	1.907	6.5481	7.399	2.2406	0.1393
BD_2012	pLARmEB	SNP_IGA_134730	1	43578596	-1.2626	8.2996	9.1992	1.244	0.2182
BD_2012	pLARmEB	SNP_IGA_128189	1	45753343	1.4691	4.2701	5.0346	1.7963	0.2763
BD_2012	pLARmEB	SNP_IGA_286418	2	28186294	-1.0456	5.3879	6.1991	0.5395	0.1064
BD_2012	pLARmEB	SNP_IGA_327678	3	15675561	0.9253	5.5366	6.3533	0.5144	0.4572
BD_2012	pLARmEB	SNP_IGA_386222	4	4045426	1.2163	7.819	8.7063	1.1104	0.4265
BD_2012	pLARmEB	SNP_IGA_408933	4	10272257	-1.7171	8.3831	9.2848	2.0197	0.1513
BD_2012	pLARmEB	SNP_IGA_420316	4	13813285	1.4754	6.6779	7.5328	1.8197	0.3607
BD_2012	pLARmEB	SNP_IGA_440662	4	16306919	2.1909	10.3733	11.3192	3.3752	0.2061
BD_2012	pLARmEB	SNP_IGA_570521	5	5305995	-1.4182	5.7348	6.5586	0.9148	0.0877
BD_2012	pLARmEB	SNP_IGA_677625	6	22842917	-2.2376	8.4478	9.3511	1.5193	0.0548
BD_2012	pLARmEB	SNP_IGA_697873	6	28913360	0.7462	4.5451	5.3221	0.4548	0.3586
BD_2012	pLARmEB	SNP_IGA_732429	7	5374461	0.8557	5.3471	6.1568	0.5273	0.4583
BD_2012	pLARmEB	SNP_IGA_776067	7	14414202	-2.2754	13.5984	14.601	3.6557	0.4748
BD_2012	pLARmEB	SNP_IGA_776348	7	14545099	1.7186	9.903	10.8392	1.3868	0.3618
BD_2012	pLARmEB	SNP_IGA_867673	8	15650294	0.712	4.9578	5.7522	0.4075	0.3366
BD_2012	pLARmEB	SNP_IGA_870525	8	16506121	0.957	5.2686	6.0753	0.2939	0.3388
BD_2012	pKWmEB	SNP_IGA_84580	1	25541717	1.7586	5.5953	6.4141	5.5587	0.12
BD_2012	pKWmEB	SNP_IGA_118784	1	40352725	-1.0106	4.3384	5.1061	1.1197	0.3183
BD_2012	pKWmEB	SNP_IGA_118212	1	40085751	1.201	3.0175	3.7139	17.4603	0.1399
BD_2012	pKWmEB	SNP_IGA_123089	1	42795711	-0.8903	3.1449	3.8493	3.3814	0.1674
BD_2012	pKWmEB	SNP_IGA_127181	1	46012310	1.1345	3.0268	3.7238	7.425	0.0705
BD_2012	pKWmEB	SNP_IGA_440662	4	16306919	1.2682	4.3298	5.0971	19.8889	0.207
BD_2012	pKWmEB	SNP_IGA_676663	6	22531824	-1.8753	5.3684	6.1789	5.5499	0.0507
BD_2012	pKWmEB	SNP_IGA_779594	7	15842240	1.4493	3.0073	3.703	11.0699	0.196
BD_2012	pKWmEB	SNP_IGA_717776	7	2339551	0.7679	3.3102	4.0246	4.1689	0.2896
BD_2012	pKWmEB	SNP_IGA_864149	8	14501494	-0.718	3.9883	4.7393	0.7537	0.4383
BD_2012	ISIS EM-BLASSO	SNP_IGA_128189	1	45753343	1.6857	4.1933	4.9542	2.3651	0.2763
BD_2012	ISIS EM-BLASSO	SNP_IGA_602661	5	16655703	1.0198	4.522	5.298	0.867	0.2643
BD_2012	ISIS EM-BLASSO	SNP_IGA_655501	6	14588253	-1.6057	3.2717	3.9838	0.5466	0.0362
BD_2012	ISIS EM-BLASSO	SNP_IGA_677625	6	22842917	-1.2476	3.2693	3.9812	0.4723	0.0548
BD_2012	ISIS EM-BLASSO	SNP_IGA_759649	7	10525885	1.208	3.0899	3.7909	1.0777	0.182
BD_2012	ISIS EM-BLASSO	SNP_IGA_816287	8	4325057	-1.2179	8.3103	9.2102	1.2311	0.2621
RD_2010	mrMLM	SNP_IGA_415301	4	12523245	9.1185	6.9528	7.8159	33.6563	0.458
RD_2010	mrMLM	SNP_IGA_411637	4	10981971	-8.5872	5.6511	6.472	33.0844	0.3427
RD_2010	FASTmrMLM	SNP_IGA_411637	4	10981971	-2.913e-05	5.6514	6.4723	3.8072e-10	0.3379
RD_2010	FASTmrMLM	SNP_IGA_415301	4	12523245	7.4217	6.9546	7.8178	22.2959	0.4517
RD_2010	FASTmrEMMA	SNP_IGA_410398	4	10696489	-17.1347	7.2722	8.1445	16.5417	0.3517
RD_2010	FASTmrEMMA	SNP_IGA_415301	4	12523245	14.8141	6.2617	7.1035	14.1442	0.4517
RD_2010	pLARmEB	SNP_IGA_411637	4	10981971	-7.1581	8.9994	9.9158	21.1182	0.3379
RD_2010	pLARmEB	SNP_IGA_415301	4	12523245	10.0058	12.7896	13.7793	37.227	0.4517
RD_2010	pLARmEB	SNP_IGA_864632	8	14623156	-2.8867	3.619	4.3508	3.2831	0.3897
RD_2010	ISIS EM-BLASSO	SNP_IGA_410794	4	10890653	-6.5325	4.977	5.7722	19.1463	0.3345
RD_2010	ISIS EM-BLASSO	SNP_IGA_415301	4	12523245	7.4772	8.1112	9.0061	22.6305	0.4517
RD_2011	mrMLM	SNP_IGA_410398	4	10696489	-12.3418	4.2761	5.0409	16.0334	0.4958
RD_2011	mrMLM	SNP_IGA_411637	4	10981971	-13.4672	20.3221	21.4095	23.4202	0.3157
RD_2011	mrMLM	SNP_IGA_410336	4	10676008	-9.4434	5.3568	6.1668	10.1418	0.4831
RD_2011	mrMLM	SNP_IGA_415382	4	12546297	7.496	4.6894	5.4726	3.6548	0.2934
RD_2011	mrMLM	SNP_IGA_409901	4	10582092	6.6953	3.02	3.7165	5.6093	0.4047
RD_2011	mrMLM	SNP_IGA_384554	4	3410071	8.3912	9.8155	10.7499	9.0909	0.3496
RD_2011	mrMLM	SNP_IGA_425934	4	14768290	-6.4188	3.3922	4.1113	5.1475	0.2055
RD_2011	mrMLM	SNP_IGA_632033	6	8774913	9.1153	7.0167	7.8817	5.4045	0.0826
RD_2011	FASTmrMLM	SNP_IGA_384554	4	3410071	6.9878	8.1544	9.0504	3.3371	0.3481
RD_2011	FASTmrMLM	SNP_IGA_409901	4	10582092	4.3312	3.6404	4.3734	1.2426	0.403
RD_2011	FASTmrMLM	SNP_IGA_410398	4	10696489	-10.0789	11.4564	12.423	5.6602	0.4979
RD_2011	FASTmrMLM	SNP_IGA_410478	4	10760086	8.3184	4.3417	5.1096	4.7278	0.2838
RD_2011	FASTmrMLM	SNP_IGA_411601	4	10976364	15.0237	10.012	10.9505	15.0989	0.2458
RD_2011	FASTmrMLM	SNP_IGA_411637	4	10981971	-28.1065	20.1253	21.2107	53.9991	0.3143
RD_2011	FASTmrMLM	SNP_IGA_415301	4	12523245	3.5095	4.1147	4.8719	0.7288	0.4399
RD_2011	FASTmrMLM	SNP_IGA_425934	4	14768290	-5.6831	4.8347	5.6241	2.136	0.2046
RD_2011	FASTmrMLM	SNP_IGA_632033	6	8774913	7.23	5.0602	5.8587	1.7998	0.0833
RD_2011	FASTmrEMMA	SNP_IGA_400260	4	7244980	18.149	18.3924	19.4587	7.5866	0.4958
RD_2011	FASTmrEMMA	SNP_IGA_410398	4	10696489	-19.5288	17.9342	18.9952	9.8739	0.4979
RD_2011	FASTmrEMMA	SNP_IGA_411637	4	10981971	-29.2299	37.6507	38.8693	18.1077	0.3143
RD_2011	pLARmEB	SNP_IGA_58626	1	17538855	5.9723	6.4573	7.3053	1.2179	0.1487
RD_2011	pLARmEB	SNP_IGA_287581	2	28786623	-3.0034	5.2379	6.0434	1.5409	0.3017
RD_2011	pLARmEB	SNP_IGA_400260	4	7244980	3.9526	3.3348	4.0506	2.0076	0.4958
RD_2011	pLARmEB	SNP_IGA_410398	4	10696489	-9.5276	21.1396	22.2354	12.6366	0.4979
RD_2011	pLARmEB	SNP_IGA_411637	4	10981971	-11.1989	27.8027	28.9567	21.4183	0.3143
RD_2011	pLARmEB	SNP_IGA_613297	6	2347217	-7.1749	10.9262	11.8829	8.2867	0.231
RD_2011	pLARmEB	SNP_IGA_632033	6	8774913	7.8226	8.6608	9.5692	5.2639	0.0833
RD_2011	pLARmEB	SNP_IGA_870525	8	16506121	3.3619	5.8413	6.6689	0.9837	0.3724
RD_2011	pKWmEB	SNP_IGA_287581	2	28786623	-3.8651	5.9699	6.8019	2.0057	0.303
RD_2011	pKWmEB	SNP_IGA_381465	4	2380301	3.9337	5.6622	6.4835	5.3187	0.4354
RD_2011	pKWmEB	SNP_IGA_415301	4	12523245	3.5135	3.5163	4.2425	14.0975	0.4417
RD_2011	pKWmEB	SNP_IGA_411637	4	10981971	-8.5453	19.7786	20.8603	25.9859	0.3157
RD_2011	pKWmEB	SNP_IGA_552247	5	2240224	-5.0839	5.7221	6.5455	3.7437	0.3792
RD_2011	pKWmEB	SNP_IGA_613624	6	2217886	-5.429	6.1649	7.0034	5.2006	0.2352
RD_2011	pKWmEB	SNP_IGA_609723	6	3411678	3.4956	4.7143	5.4986	3.425	0.3136
RD_2011	pKWmEB	SNP_IGA_632033	6	8774913	6.5148	5.8247	6.6517	1.5708	0.0826
RD_2011	pKWmEB	SNP_IGA_751897	7	8150428	2.9537	4.2781	5.043	4.3375	0.1282
RD_2011	pKWmEB	SNP_IGA_873803	8	17491608	7.0306	10.3059	11.2504	5.4391	0.1091
RD_2011	pKWmEB	SNP_IGA_869487	8	16132196	2.429	4.1879	4.9486	1.4115	0.447
RD_2011	ISIS EM-BLASSO	SNP_IGA_113314	1	37920831	-3.0792	3.6028	4.3337	1.4477	0.423
RD_2011	ISIS EM-BLASSO	SNP_IGA_375010	4	1030216	-5.7215	3.401	4.1206	5.1481	0.1846
RD_2011	ISIS EM-BLASSO	SNP_IGA_386222	4	4045426	4.5793	4.9867	5.7823	3.4055	0.48
RD_2011	ISIS EM-BLASSO	SNP_IGA_392288	4	5916267	-4.7004	5.4627	6.2767	3.5101	0.1741
RD_2011	ISIS EM-BLASSO	SNP_IGA_410165	4	10641209	10.2695	19.7976	20.8795	17.4669	0.4304
RD_2011	ISIS EM-BLASSO	SNP_IGA_411161	4	10922075	-7.7275	15.2331	16.2596	10.4853	0.3629
RD_2011	ISIS EM-BLASSO	SNP_IGA_415301	4	12523245	3.8683	4.0148	4.7671	2.3367	0.4399
RD_2011	ISIS EM-BLASSO	SNP_IGA_518093	4	22958381	3.1717	4.3572	5.1258	1.2523	0.4167
RD_2011	ISIS EM-BLASSO	SNP_IGA_613624	6	2217886	-4.6172	4.8208	5.6096	3.6327	0.2342
RD_2011	ISIS EM-BLASSO	SNP_IGA_632033	6	8774913	8.5484	10.1353	11.0764	6.6401	0.0833
RD_2011	ISIS EM-BLASSO	SNP_IGA_804939	8	2755149	8.0463	6.8407	7.7005	8.1147	0.1118
RD_2011	ISIS EM-BLASSO	SNP_IGA_873803	8	17491608	4.9445	5.0894	5.8891	2.7835	0.1086
RD_2012	mrMLM	SNP_IGA_410398	4	10696489	-10.6381	16.1564	17.1953	20.5147	0.4236
RD_2012	mrMLM	SNP_IGA_408981	4	10280095	-2.9123	4.1557	4.9148	1.0705	0.4735
RD_2012	mrMLM	SNP_IGA_386222	4	4045426	6.9363	11.6047	12.574	9.11	0.4172
RD_2012	mrMLM	SNP_IGA_417666	4	13091850	5.5687	9.6324	10.5629	4.4959	0.4352
RD_2012	mrMLM	SNP_IGA_410794	4	10890653	-12.1074	15.3801	16.4086	29.7698	0.3047
RD_2012	FASTmrMLM	SNP_IGA_386222	4	4045426	6.0864	11.6166	12.5862	6.6675	0.4154
RD_2012	FASTmrMLM	SNP_IGA_410336	4	10676008	-4.7995	5.2827	6.0899	3.0719	0.4313
RD_2012	FASTmrMLM	SNP_IGA_410398	4	10696489	-14.5049	28.5065	29.6658	36.2525	0.4228
RD_2012	FASTmrMLM	SNP_IGA_411637	4	10981971	-11.9221	36.2915	37.5023	26.9199	0.2548
RD_2012	FASTmrMLM	SNP_IGA_417666	4	13091850	5.9627	12.3273	13.3093	4.8997	0.4366
RD_2012	FASTmrEMMA	SNP_IGA_386222	4	4045426	12.1691	11.6166	12.5862	4.0766	0.4154
RD_2012	FASTmrEMMA	SNP_IGA_410336	4	10676008	-9.5414	5.2827	6.0899	2.6	0.4313
RD_2012	FASTmrEMMA	SNP_IGA_410398	4	10696489	-28.9624	28.5065	29.6658	21.0448	0.4228
RD_2012	FASTmrEMMA	SNP_IGA_411637	4	10981971	-23.8493	36.2915	37.5023	11.7347	0.2548
RD_2012	FASTmrEMMA	SNP_IGA_417666	4	13091850	11.9094	12.3273	13.3093	4.1469	0.4366
RD_2012	pLARmEB	SNP_IGA_99110	1	30864365	-3.2921	4.649	5.4305	0.3986	0.2051
RD_2012	pLARmEB	SNP_IGA_316615	3	8145641	-3.8319	6.2206	7.061	2.5688	0.2188
RD_2012	pLARmEB	SNP_IGA_386222	4	4045426	5.3622	11.4966	12.464	4.9233	0.4154
RD_2012	pLARmEB	SNP_IGA_408223	4	10107085	-5.6586	11.0839	12.0436	5.8639	0.3256
RD_2012	pLARmEB	SNP_IGA_409141	4	10356359	6.4568	10.8929	11.849	7.5527	0.3679
RD_2012	pLARmEB	SNP_IGA_410398	4	10696489	-7.8187	15.9558	16.9921	10.0211	0.4228
RD_2012	pLARmEB	SNP_IGA_411637	4	10981971	-11.5783	34.31	35.5088	24.1543	0.2548
RD_2012	pLARmEB	SNP_IGA_417666	4	13091850	3.3213	6.2016	7.0414	1.4462	0.4366
RD_2012	pLARmEB	SNP_IGA_603047	5	16768945	-4.818	8.9233	9.8379	4.2621	0.3108
RD_2012	pLARmEB	SNP_IGA_688317	6	26230743	2.2431	4.3587	5.1273	0.921	0.2939
RD_2012	pKWmEB	SNP_IGA_99110	1	30864365	-3.5872	6.3986	7.2447	0.8668	0.2028
RD_2012	pKWmEB	SNP_IGA_288845	2	29376788	-3.2501	6.1613	6.9997	0.7294	0.397
RD_2012	pKWmEB	SNP_IGA_432210	3	11016243	3.0801	3.8839	4.6296	3.4323	0.2367
RD_2012	pKWmEB	SNP_IGA_410398	4	10696489	-10.5575	43.0124	44.2594	31.1708	0.4236
RD_2012	pKWmEB	SNP_IGA_516824	4	22849976	4.6518	9.5505	10.4792	2.7825	0.3546
RD_2012	pKWmEB	SNP_IGA_411637	4	10981971	-9.3255	26.3097	27.452	21.8168	0.2558
RD_2012	pKWmEB	SNP_IGA_417666	4	13091850	1.9457	3.2694	3.9813	4.2839	0.4352
RD_2012	pKWmEB	SNP_IGA_381287	4	2299587	3.0857	4.2671	5.0315	1.837	0.3185
RD_2012	pKWmEB	SNP_IGA_603047	5	16768945	-4.4291	8.202	9.0992	6.1249	0.31
RD_2012	pKWmEB	snp_6_2750075	6	2458637	-2.199	3.07	3.7697	1.6284	0.465
RD_2012	pKWmEB	SNP_IGA_773218	7	13581006	2.0036	3.5303	4.2572	0.3925	0.4363
RD_2012	pKWmEB	SNP_IGA_879528	8	19234898	2.7246	4.6174	5.3976	3.3608	0.2463
RD_2012	ISIS EM-BLASSO	SNP_IGA_99110	1	30864365	-3.7372	7.0071	7.8718	0.568	0.2051
RD_2012	ISIS EM-BLASSO	SNP_IGA_316047	3	7943434	3.0362	6.2058	7.0457	1.3861	0.4429
RD_2012	ISIS EM-BLASSO	SNP_IGA_386222	4	4045426	5.8566	14.8685	15.8899	6.4947	0.4154
RD_2012	ISIS EM-BLASSO	SNP_IGA_408223	4	10107085	-5.5262	11.3913	12.3568	6.1845	0.3256
RD_2012	ISIS EM-BLASSO	SNP_IGA_409141	4	10356359	6.9379	12.8105	13.8006	9.643	0.3679
RD_2012	ISIS EM-BLASSO	SNP_IGA_410398	4	10696489	-6.1383	8.6587	9.5671	6.8303	0.4228
RD_2012	ISIS EM-BLASSO	SNP_IGA_411637	4	10981971	-12.2189	46.4916	47.7552	29.7478	0.2548
RD_2012	ISIS EM-BLASSO	SNP_IGA_415301	4	12523245	4.2979	9.935	10.8719	2.5738	0.4884
RD_2012	ISIS EM-BLASSO	SNP_IGA_603047	5	16768945	-5.2022	11.126	12.0865	5.4948	0.3108
RD_2012	ISIS EM-BLASSO	SNP_IGA_609463	6	3544626	-3.6949	7.3867	8.2623	2.759	0.297
RD_2012	ISIS EM-BLASSO	SNP_IGA_652492	6	13508541	-3.3075	4.2042	4.9656	1.1857	0.0941
DAF_2011	mrMLM	SNP_IGA_410398	4	10696489	-8.9915	6.1414	6.9792	11.9504	0.3977
DAF_2011	mrMLM	SNP_IGA_400260	4	7244980	10.4262	5.6372	6.4576	15.6203	0.3918
DAF_2011	mrMLM	SNP_IGA_411637	4	10981971	-14.2542	10.247	11.1904	29.1959	0.2164
DAF_2011	mrMLM	SNP_IGA_602331	5	16550893	-14.4319	10.04	10.9791	20.2757	0.117
DAF_2011	FASTmrMLM	SNP_IGA_400260	4	7244980	9.0541	5.6378	6.4582	12.611	0.3873
DAF_2011	FASTmrMLM	SNP_IGA_410398	4	10696489	-8.3633	6.1412	6.979	11.0687	0.3931
DAF_2011	FASTmrMLM	SNP_IGA_411637	4	10981971	-14.0604	10.2473	11.1907	30.4126	0.2139
DAF_2011	FASTmrMLM	SNP_IGA_602331	5	16550893	-13.6953	10.0409	10.98	19.5474	0.1156
DAF_2011	FASTmrEMMA	SNP_IGA_410398	4	10696489	-15.6225	5.2429	6.0486	8.2209	0.3931
DAF_2011	FASTmrEMMA	SNP_IGA_411637	4	10981971	-27.3752	8.2861	9.1854	16.9066	0.2139
DAF_2011	FASTmrEMMA	SNP_IGA_602331	5	16550893	-29.0205	9.0883	10.0067	13.0283	0.1156
DAF_2011	pLARmEB	SNP_IGA_307596	3	5921975	7.0694	4.1747	4.9347	7.4531	0.185
DAF_2011	pLARmEB	SNP_IGA_410398	4	10696489	-8.7706	6.1676	7.0062	12.0493	0.3931
DAF_2011	pLARmEB	SNP_IGA_411637	4	10981971	-16.1872	12.4168	13.4003	39.8998	0.2139
DAF_2011	pLARmEB	SNP_IGA_440116	4	16084694	7.3397	4.155	4.9141	8.7323	0.2457
DAF_2011	pKWmEB	SNP_IGA_411637	4	10981971	-10.5796	5.347	6.1567	23.3076	0.2164
DAF_2011	pKWmEB	SNP_IGA_410398	4	10696489	-10.5685	8.8485	9.7614	20.8511	0.3977
DAF_2011	pKWmEB	SNP_IGA_398634	4	6969104	-7.5287	7.457	8.3345	9.0063	0.5
DAF_2011	pKWmEB	SNP_IGA_417666	4	13091850	6.652	5.7126	6.5357	7.6411	0.3538
DAF_2011	ISIS EM-BLASSO	SNP_IGA_410398	4	10696489	-8.8054	6.8928	7.7542	12.2422	0.3931
DAF_2011	ISIS EM-BLASSO	SNP_IGA_411637	4	10981971	-14.4095	11.3813	12.3466	31.8699	0.2139
DAF_2011	ISIS EM-BLASSO	SNP_IGA_440116	4	16084694	7.8306	7.12	7.988	10.019	0.2457
DAF_2011	ISIS EM-BLASSO	SNP_IGA_602331	5	16550893	-13.6767	5.7353	6.5592	19.4508	0.1156
DAF_2012	mrMLM	SNP_IGA_410398	4	10696489	-14.6044	10.7388	11.6919	28.4426	0.4153
DAF_2012	mrMLM	SNP_IGA_411637	4	10981971	-16.7091	24.9759	26.1071	40.6075	0.2632
DAF_2012	mrMLM	SNP_IGA_409544	4	10416496	-3.9543	4.1912	4.952	2.1222	0.4359
DAF_2012	mrMLM	SNP_IGA_410336	4	10676008	-5.3033	5.6785	6.5003	2.831	0.4222
DAF_2012	mrMLM	SNP_IGA_415382	4	12546297	5.7234	6.5876	7.4397	2.372	0.2654
DAF_2012	mrMLM	SNP_IGA_403613	4	9052116	5.4277	3.5799	4.3096	3.8256	0.4256
DAF_2012	mrMLM	SNP_IGA_524971	4	23474309	3.8173	3.1023	3.804	0.9113	0.357
DAF_2012	mrMLM	SNP_IGA_632033	6	8774913	7.775	4.1855	4.9461	4.0835	0.0664
DAF_2012	FASTmrMLM	SNP_IGA_384554	4	3410071	3.8893	4.7325	5.5176	2.2723	0.2528
DAF_2012	FASTmrMLM	SNP_IGA_403613	4	9052116	3.8831	3.6233	4.3553	2.0364	0.4248
DAF_2012	FASTmrMLM	SNP_IGA_410398	4	10696489	-7.5443	12.0599	13.0373	7.8937	0.4146
DAF_2012	FASTmrMLM	SNP_IGA_411601	4	10976364	7.7922	4.9292	5.7225	8.4975	0.1891
DAF_2012	FASTmrMLM	SNP_IGA_411637	4	10981971	-19.2661	28.7678	29.9291	56.1481	0.262
DAF_2012	FASTmrMLM	SNP_IGA_524971	4	23474309	1.9355	3.6128	4.3443	0.2436	0.3588
DAF_2012	FASTmrMLM	SNP_IGA_632033	6	8774913	8.5082	7.1005	7.968	5.0857	0.0672
DAF_2012	FASTmrEMMA	SNP_IGA_384554	4	3410071	6.4245	3.1542	3.8591	1.3899	0.2528
DAF_2012	FASTmrEMMA	SNP_IGA_403613	4	9052116	10.3515	5.8389	6.6664	4.3545	0.4248
DAF_2012	FASTmrEMMA	SNP_IGA_410398	4	10696489	-14.359	12.9502	13.9425	8.541	0.4146
DAF_2012	FASTmrEMMA	SNP_IGA_411637	4	10981971	-33.796	56.5514	57.8569	39.2848	0.262
DAF_2012	pLARmEB	SNP_IGA_103381	1	33510762	-6.021	5.7433	6.5674	4.7675	0.1355
DAF_2012	pLARmEB	SNP_IGA_316047	3	7943434	2.1584	3.7111	4.4479	0.6038	0.4226
DAF_2012	pLARmEB	SNP_IGA_402256	4	8371579	5.8291	9.9832	10.9211	5.5358	0.1708
DAF_2012	pLARmEB	SNP_IGA_408223	4	10107085	-5.9226	15.2356	16.2621	6.5987	0.3178
DAF_2012	pLARmEB	SNP_IGA_410398	4	10696489	-11.5285	38.3622	39.5848	22.6523	0.4146
DAF_2012	pLARmEB	SNP_IGA_411637	4	10981971	-11.3554	31.9967	33.1806	23.9702	0.262
DAF_2012	pLARmEB	SNP_IGA_415382	4	12546297	4.6354	9.4238	10.3497	1.9886	0.2677
DAF_2012	pLARmEB	SNP_IGA_613297	6	2347217	-3.9751	5.8155	6.6422	2.9676	0.2802
DAF_2012	pLARmEB	SNP_IGA_632033	6	8774913	6.3557	5.5696	6.3875	3.4875	0.0672
DAF_2012	pLARmEB	SNP_IGA_686667	6	25788685	3.4176	5.4206	6.233	1.888	0.197
DAF_2012	pLARmEB	SNP_IGA_879528	8	19234898	4.1871	6.5136	7.3634	3.2623	0.2483
DAF_2012	pKWmEB	SNP_IGA_2932	1	948415	-2.0748	4.0012	4.7528	0.3151	0.476
DAF_2012	pKWmEB	SNP_IGA_121740	1	41735317	-2.3281	3.2499	3.9607	1.2681	0.3982
DAF_2012	pKWmEB	SNP_IGA_410398	4	10696489	-9.2032	28.7189	29.8798	15.2173	0.4153
DAF_2012	pKWmEB	SNP_IGA_411637	4	10981971	-12.0772	41.3644	42.6031	37.4585	0.2632
DAF_2012	pKWmEB	SNP_IGA_415301	4	12523245	2.6131	3.808	4.5498	1.8245	0.4863
DAF_2012	pKWmEB	SNP_IGA_403613	4	9052116	5.11	14.1348	15.1455	5.6282	0.4256
DAF_2012	pKWmEB	SNP_IGA_516824	4	22849976	2.4016	4.3512	5.1195	1.1551	0.3524
DAF_2012	pKWmEB	SNP_IGA_613166	6	2472600	-5.3864	8.6304	9.5381	9.7454	0.2449
DAF_2012	pKWmEB	SNP_IGA_861261	8	13739391	4.5122	6.2779	7.1202	6.5122	0.1545
DAF_2012	pKWmEB	SNP_IGA_865098	8	14686892	-3.8641	6.1532	6.9914	4.5117	0.3822
DAF_2012	ISIS EM-BLASSO	SNP_IGA_103381	1	33510762	-5.6541	5.9787	6.811	5.1202	0.1355
DAF_2012	ISIS EM-BLASSO	SNP_IGA_353556	3	21637789	-4.8218	3.5282	4.255	5.2403	0.2312
DAF_2012	ISIS EM-BLASSO	SNP_IGA_402256	4	8371579	5.859	9.7992	10.7332	6.8114	0.1708
DAF_2012	ISIS EM-BLASSO	SNP_IGA_405554	4	9617585	3.0296	3.7197	4.4569	2.029	0.3702
DAF_2012	ISIS EM-BLASSO	SNP_IGA_410398	4	10696489	-9.3182	21.3674	22.4655	18.0237	0.4146
DAF_2012	ISIS EM-BLASSO	SNP_IGA_410794	4	10890653	-11.5402	28.0768	29.2329	30.4859	0.3144
DAF_2012	ISIS EM-BLASSO	SNP_IGA_419201	4	13561808	-5.1527	5.9037	6.7334	5.4044	0.1663
DAF_2012	ISIS EM-BLASSO	SNP_IGA_516824	4	22849976	3.2218	6.679	7.5339	1.1545	0.3542
DAF_2012	ISIS EM-BLASSO	SNP_IGA_609630	6	3440533	-2.972	4.8878	5.6794	2.0219	0.2984
DAF_2012	ISIS EM-BLASSO	SNP_IGA_858404	8	12650784	-2.8824	4.2001	4.9614	0.5	0.2756
DAF_2012	ISIS EM-BLASSO	SNP_IGA_869240	8	16042676	-4.1826	6.9252	7.7875	4.0107	0.2882
Blush_2010	mrMLM	SNP_IGA_349233	3	20300608	0.4942	4.1871	4.9477	6.1044	0.4082
Blush_2010	mrMLM	SNP_IGA_357931	3	22722513	1.1089	8.3852	9.2869	20.1155	0.1054
Blush_2010	mrMLM	SNP_IGA_624226	6	6342260	1.8011	16.2945	17.3352	54.934	0.0816
Blush_2010	FASTmrMLM	SNP_IGA_7992	1	2518043	0.5385	4.8017	5.5897	11.1131	0.198
Blush_2010	FASTmrMLM	SNP_IGA_259741	2	17427335	0.7401	4.4304	5.2023	11.9554	0.0906
Blush_2010	FASTmrMLM	SNP_IGA_349233	3	20300608	0.4086	3.5975	4.3281	5.5673	0.4161
Blush_2010	FASTmrMLM	SNP_IGA_357931	3	22722513	1.1036	7.8626	8.751	26.5798	0.104
Blush_2010	FASTmrMLM	SNP_IGA_397470	4	6624729	0.6915	4.3517	5.12	19.9837	0.2483
Blush_2010	FASTmrEMMA	SNP_IGA_397470	4	6624729	1.906	5.3153	6.1238	14.2775	0.2483
Blush_2010	pLARmEB	SNP_IGA_103771	1	33744976	0.4035	3.1553	3.8603	3.2711	0.3289
Blush_2010	pLARmEB	SNP_IGA_259741	2	17427335	0.5096	3.8259	4.5687	2.739	0.0906
Blush_2010	pLARmEB	SNP_IGA_341962	3	18179421	-0.5354	5.0933	5.8932	2.5765	0.2215
Blush_2010	pLARmEB	SNP_IGA_357931	3	22722513	0.5951	3.8224	4.565	3.735	0.104
Blush_2010	pLARmEB	SNP_IGA_397470	4	6624729	0.7739	5.6725	6.4941	12.097	0.2483
Blush_2010	ISIS EM-BLASSO	SNP_IGA_341962	3	18179421	-0.6394	6.8442	7.7041	11.4407	0.2215
Blush_2010	ISIS EM-BLASSO	SNP_IGA_397470	4	6624729	0.6441	3.8206	4.5631	26.0889	0.2483
Blush_2011	mrMLM	SNP_IGA_7992	1	2518043	0.231	3.9629	4.7126	3.373	0.2932
Blush_2011	mrMLM	SNP_IGA_127323	1	45900381	0.5756	10.5764	11.5264	11.9402	0.0947
Blush_2011	mrMLM	SNP_IGA_164367	2	4419209	0.3527	10.8755	11.8313	4.4393	0.3642
Blush_2011	mrMLM	SNP_IGA_149668	2	3185530	0.4008	6.6812	7.5362	8.3092	0.1523
Blush_2011	mrMLM	SNP_IGA_330725	3	16198112	0.6145	16.0826	17.1205	21.7349	0.1955
Blush_2011	mrMLM	SNP_IGA_349831	3	20473077	0.2812	5.1872	5.9907	4.9836	0.2798
Blush_2011	mrMLM	SNP_IGA_358948	3	23103799	0.2969	5.5268	6.3432	1.9773	0.2346
Blush_2011	mrMLM	SNP_IGA_298007	3	3849042	-0.5699	8.054	8.9474	1.3245	0.0607
Blush_2011	mrMLM	SNP_IGA_554302	5	2721880	0.4502	4.0995	4.8559	5.6844	0.0658
Blush_2011	mrMLM	SNP_IGA_602331	5	16550893	0.3253	6.2534	7.0949	6.3616	0.2366
Blush_2011	FASTmrMLM	SNP_IGA_7992	1	2518043	0.1943	4.2297	4.9923	3.0203	0.292
Blush_2011	FASTmrMLM	SNP_IGA_127323	1	45900381	0.3505	3.0817	3.7822	5.606	0.0943
Blush_2011	FASTmrMLM	SNP_IGA_149668	2	3185530	0.4093	8.6873	9.5963	10.9751	0.1516
Blush_2011	FASTmrMLM	SNP_IGA_164367	2	4419209	0.3065	7.9894	8.8811	4.2462	0.3668
Blush_2011	FASTmrMLM	SNP_IGA_330725	3	16198112	0.4205	8.5334	9.4387	12.8869	0.1947
Blush_2011	FASTmrMLM	SNP_IGA_349831	3	20473077	0.2624	4.8606	5.651	5.4923	0.2787
Blush_2011	FASTmrMLM	SNP_IGA_554302	5	2721880	0.4138	4.5124	5.2879	6.0814	0.0656
Blush_2011	FASTmrMLM	SNP_IGA_602331	5	16550893	0.301	6.4998	7.3491	6.8989	0.2357
Blush_2011	FASTmrEMMA	SNP_IGA_349097	3	20241224	0.8766	9.9396	10.8766	11.0316	0.3627
Blush_2011	FASTmrEMMA	SNP_IGA_602331	5	16550893	0.3703	3.2541	3.9651	1.4117	0.2357
Blush_2011	pLARmEB	SNP_IGA_87689	1	26845540	0.2448	3.6435	4.3766	2.2065	0.3176
Blush_2011	pLARmEB	SNP_IGA_128925	1	45526898	0.2063	3.2307	3.9403	1.2749	0.1711
Blush_2011	pLARmEB	SNP_IGA_207948	2	7662160	0.466	9.2455	10.1675	7.5649	0.2193
Blush_2011	pLARmEB	SNP_IGA_341962	3	18179421	-0.4695	11.3394	12.3039	2.2249	0.2305
Blush_2011	pLARmEB	SNP_IGA_349831	3	20473077	0.2009	3.1592	3.8645	1.4854	0.2787
Blush_2011	pLARmEB	SNP_IGA_602331	5	16550893	0.272	8.0581	8.9516	2.5988	0.2357
Blush_2011	pLARmEB	SNP_IGA_688290	6	26225619	0.255	4.5206	5.2965	2.2099	0.1957
Blush_2011	pKWmEB	SNP_IGA_103381	1	33510762	0.3286	3.9555	4.7048	12.5281	0.1512
Blush_2011	pKWmEB	SNP_IGA_160938	2	4172141	0.2886	3.2173	3.9261	9.5825	0.2325
Blush_2011	pKWmEB	SNP_IGA_358948	3	23103799	0.2466	3.2452	3.9557	1.8232	0.2346
Blush_2011	pKWmEB	SNP_IGA_349831	3	20473077	0.2048	3.914	4.6613	7.9661	0.2798
Blush_2011	pKWmEB	SNP_IGA_378805	4	1344776	0.1903	3.602	4.3329	4.9389	0.3992
Blush_2011	pKWmEB	SNP_IGA_414220	4	12056525	0.1917	3.1079	3.81	2.9563	0.25
Blush_2011	pKWmEB	SNP_IGA_554302	5	2721880	0.3777	3.7929	4.534	7.9402	0.0658
Blush_2011	ISIS EM-BLASSO	SNP_IGA_7524	1	2335065	0.3546	5.265	6.0715	8.0575	0.1148
Blush_2011	ISIS EM-BLASSO	SNP_IGA_88751	1	27057490	0.2965	4.6782	5.461	7.5615	0.2182
Blush_2011	ISIS EM-BLASSO	SNP_IGA_129422	1	45459468	0.2524	5.174	5.977	4.7636	0.1721
Blush_2011	ISIS EM-BLASSO	SNP_IGA_330725	3	16198112	0.2773	5.4727	6.2871	6.4261	0.1947
Blush_2011	ISIS EM-BLASSO	SNP_IGA_341962	3	18179421	-0.3902	8.9143	9.8287	3.8194	0.2305
Blush_2011	ISIS EM-BLASSO	SNP_IGA_349831	3	20473077	0.2386	4.4384	5.2106	5.2079	0.2787
Blush_2011	ISIS EM-BLASSO	SNP_IGA_419614	4	13633831	0.2565	5.7036	6.5263	6.0342	0.3002
Blush_2011	ISIS EM-BLASSO	SNP_IGA_602331	5	16550893	0.2561	4.794	5.5817	5.7247	0.2357
Blush_2012	mrMLM	SNP_IGA_88046	1	26896332	0.5076	3.7771	4.5173	24.4186	0.2822
Blush_2012	mrMLM	SNP_IGA_410794	4	10890653	0.4547	8.2514	9.1498	19.9423	0.3066
Blush_2012	FASTmrMLM	SNP_IGA_88046	1	26896332	0.2184	3.0306	3.7278	5.4027	0.2821
Blush_2012	FASTmrMLM	SNP_IGA_112112	1	37534135	-0.2041	3.9432	4.6919	1.9045	0.2863
Blush_2012	FASTmrMLM	SNP_IGA_671630	6	20930587	0.4075	3.5771	4.3066	10.8351	0.0926
Blush_2012	FASTmrEMMA	SNP_IGA_84580	1	25541717	0.8361	3.625	4.3572	6.0034	0.1347
Blush_2012	FASTmrEMMA	SNP_IGA_88046	1	26896332	0.5	4.0313	4.7845	3.6537	0.2821
Blush_2012	FASTmrEMMA	SNP_IGA_112112	1	37534135	-0.4292	3.8474	4.5912	2.485	0.2863
Blush_2012	pLARmEB	SNP_IGA_84580	1	25541717	0.3988	3.4955	4.2205	8.455	0.1347
Blush_2012	pLARmEB	SNP_IGA_88046	1	26896332	0.2824	5.9981	6.8311	6.0882	0.2821
Blush_2012	pLARmEB	SNP_IGA_112690	1	37732185	-0.2154	5.6906	6.5129	3.3396	0.3863
Blush_2012	pLARmEB	SNP_IGA_341962	3	18179421	-0.2614	4.7323	5.5174	1.1783	0.2189
Blush_2012	pKWmEB	SNP_IGA_88046	1	26896332	0.411	14.9871	16.0102	23.9348	0.2822
Blush_2012	pKWmEB	SNP_IGA_392950	4	5824755	0.267	6.7072	7.563	15.8887	0.2854
Blush_2012	pKWmEB	SNP_IGA_612827	6	2543902	0.1779	3.3933	4.1125	3.1457	0.1734
Blush_2012	ISIS EM-BLASSO	SNP_IGA_88046	1	26896332	0.4033	5.9021	6.7318	17.3104	0.2821
Blush_2012	ISIS EM-BLASSO	SNP_IGA_112690	1	37732185	-0.2663	6.0129	6.8464	7.1175	0.3863
Blush_2012	ISIS EM-BLASSO	SNP_IGA_341962	3	18179421	-0.2799	6.3151	7.1586	1.8839	0.2189
Blush_2012	ISIS EM-BLASSO	SNP_IGA_406862	4	9901076	-0.1843	3.7301	4.4679	3.4717	0.2084
Blush_2012	ISIS EM-BLASSO	SNP_IGA_612827	6	2543902	0.194	4.3125	5.079	3.513	0.1726
FDIA_2011	mrMLM	SNP_IGA_104819	1	34325189	4.3329	8.0991	8.9936	15.4647	0.4952
FDIA_2011	mrMLM	SNP_IGA_531810	4	24879284	3.0358	3.6598	4.3938	9.6484	0.1597
FDIA_2011	mrMLM	SNP_IGA_595424	5	12884759	-4.4554	3.0912	3.7922	21.2153	0.2016
FDIA_2011	mrMLM	SNP_IGA_873803	8	17491608	2.8928	4.4113	5.1823	6.361	0.1129
FDIA_2011	FASTmrMLM	SNP_IGA_40406	1	13527092	4.2943	5.7895	6.6153	19.8522	0.1923
FDIA_2011	FASTmrMLM	SNP_IGA_104819	1	34325189	3.2838	7.7526	8.6381	8.3601	0.4952
FDIA_2011	FASTmrMLM	SNP_IGA_531810	4	24879284	4.0638	4.1429	4.9014	16.2718	0.1587
FDIA_2011	FASTmrMLM	SNP_IGA_595424	5	12884759	-2.2877	3.0848	3.7854	5.2642	0.2003
FDIA_2011	pLARmEB	SNP_IGA_104819	1	34325189	3.0847	5.8617	6.69	5.6176	0.4952
FDIA_2011	pLARmEB	SNP_IGA_299341	3	4078942	2.9862	4.8323	5.6216	6.8966	0.4423
FDIA_2011	pLARmEB	SNP_IGA_404442	4	9321093	-3.9154	5.9114	6.7414	12.4018	0.1859
FDIA_2011	pLARmEB	SNP_IGA_617922	6	1115780	-2.6912	4.2983	5.0642	4.3208	0.1394
FDIA_2011	pKWmEB	SNP_IGA_104857	1	34348489	1.5308	3.0454	3.7436	7.2908	0.4242
FDIA_2011	pKWmEB	SNP_IGA_36555	1	12739844	1.9784	3.7453	4.4839	22.994	0.2677
FDIA_2011	pKWmEB	SNP_IGA_307230	3	5805089	-2.4455	5.2008	6.0049	7.5003	0.4855
FDIA_2011	pKWmEB	SNP_IGA_607343	6	409638	-3.9154	6.51	7.3597	10.2785	0.1403
FDIA_2011	ISIS EM-BLASSO	SNP_IGA_104857	1	34348489	2.4389	6.5059	7.3554	5.348	0.4247
FDIA_2011	ISIS EM-BLASSO	SNP_IGA_298935	3	3989094	2.7714	4.8275	5.6166	8.3612	0.3958
FDIA_2011	ISIS EM-BLASSO	SNP_IGA_531692	4	24858383	3.8823	5.7557	6.5803	16.1589	0.1779
FDIA_2011	ISIS EM-BLASSO	SNP_IGA_617922	6	1115780	-3.0487	4.2646	5.0289	7.4888	0.1394
FDIA_2011	ISIS EM-BLASSO	SNP_IGA_786598	7	19063706	-2.3633	4.7299	5.5149	5.8056	0.1875
FDIA_2011	ISIS EM-BLASSO	SNP_IGA_865709	8	14838759	1.8541	3.021	3.7176	3.8403	0.2292
FDIA_2012	mrMLM	SNP_IGA_408223	4	10107085	-2.2503	3.1232	3.8262	9.4383	0.3429
FDIA_2012	mrMLM	SNP_IGA_412662	4	11298736	-2.5165	4.2455	5.0089	11.2085	0.2054
FDIA_2012	mrMLM	SNP_IGA_726818	7	207697	-2.0667	3.025	3.7219	7.8714	0.2447
FDIA_2012	mrMLM	SNP_IGA_770009	7	12348853	3.2087	4.6745	5.4571	9.5879	0.2931
FDIA_2012	FASTmrMLM	SNP_IGA_408223	4	10107085	-1.7112	3.1232	3.8262	6.0866	0.3423
FDIA_2012	FASTmrMLM	SNP_IGA_412662	4	11298736	-1.8958	4.2456	5.009	7.094	0.2057
FDIA_2012	FASTmrMLM	SNP_IGA_726818	7	207697	-1.5212	3.025	3.7219	4.7558	0.2432
FDIA_2012	FASTmrMLM	SNP_IGA_770009	7	12348853	2.7156	4.6745	5.4571	7.6587	0.2958
FDIA_2012	FASTmrEMMA	SNP_IGA_875060	8	17873860	6.0717	4.8083	5.5966	4.5359	0.1321
FDIA_2012	pLARmEB	SNP_IGA_379393	4	1391180	1.4894	3.3937	4.1129	2.7938	0.3108
FDIA_2012	pLARmEB	SNP_IGA_410398	4	10696489	2.2785	6.0486	6.8833	3.5102	0.4159
FDIA_2012	pLARmEB	snp_6_21067422	6	22931779	1.3577	3.6368	4.3696	2.3176	0.3318
FDIA_2012	pLARmEB	SNP_IGA_726818	7	207697	-2.1667	5.0521	5.8503	5.8812	0.2432
FDIA_2012	pLARmEB	SNP_IGA_872765	8	17207718	1.6453	3.0217	3.7183	0.7474	0.2462
FDIA_2012	pKWmEB	SNP_IGA_532542	4	24984572	1.529	3.2562	3.9673	6.298	0.4199
FDIA_2012	pKWmEB	SNP_IGA_397280	4	6556594	-1.8714	3.7593	4.4986	4.5231	0.4577
FDIA_2012	pKWmEB	SNP_IGA_602432	5	16584717	3.0328	6.8013	7.6599	2.5969	0.3021
FDIA_2012	pKWmEB	SNP_IGA_662245	6	17714033	-5.5775	11.9282	12.9033	30.6972	0.0755
FDIA_2012	pKWmEB	snp_6_21067422	6	22931779	1.0691	3.0376	3.7353	5.1654	0.3338
FDIA_2012	pKWmEB	SNP_IGA_770009	7	12348853	1.9974	5.9465	6.7777	5.1772	0.2931
FDIA_2012	ISIS EM-BLASSO	SNP_IGA_410398	4	10696489	1.9589	5.0754	5.8745	4.3848	0.4159
FDIA_2012	ISIS EM-BLASSO	SNP_IGA_532542	4	24984572	1.512	3.467	4.1904	4.3021	0.4204
FDIA_2012	ISIS EM-BLASSO	SNP_IGA_602432	5	16584717	3.111	6.9187	7.7808	3.3803	0.3048
FDIA_2012	ISIS EM-BLASSO	snp_6_13059650	6	13073956	-2.2957	3.3527	4.0695	11.1581	0.2252
FDIA_2012	ISIS EM-BLASSO	SNP_IGA_726818	7	207697	-1.9196	4.2557	5.0196	7.8017	0.2432
FDIA_2012	ISIS EM-BLASSO	SNP_IGA_875060	8	17873860	2.6027	4.0152	4.7675	0.6972	0.1321
FW_2010	mrMLM	SNP_IGA_292307	3	1316668	24.0908	7.0688	7.9353	28.0461	0.2465
FW_2010	mrMLM	SNP_IGA_679199	6	23496723	-18.4707	5.3003	6.1082	8.0941	0.4306
FW_2010	mrMLM	SNP_IGA_621556	6	5435066	-31.0802	8.5006	9.4051	28.374	0.1076
FW_2010	FASTmrEMMA	SNP_IGA_678681	6	23319779	-31.8837	3.2319	3.9416	8.4817	0.2911
FW_2010	pLARmEB	SNP_IGA_292307	3	1316668	21.3582	7.4905	8.3689	23.6386	0.2432
FW_2010	pLARmEB	SNP_IGA_621556	6	5435066	-28.3244	5.3111	6.1194	25.2695	0.1062
FW_2010	pLARmEB	SNP_IGA_679199	6	23496723	-15.7399	5.0682	5.8671	6.3027	0.4349
FW_2010	ISIS EM-BLASSO	SNP_IGA_292307	3	1316668	21.3582	7.4905	8.3689	24.6857	0.2432
FW_2010	ISIS EM-BLASSO	SNP_IGA_621556	6	5435066	-28.3244	5.3111	6.1194	26.3889	0.1062
FW_2010	ISIS EM-BLASSO	SNP_IGA_679199	6	23496723	-15.7399	5.0682	5.8671	6.5819	0.4349
FW_2011	mrMLM	SNP_IGA_1129	1	209701	-13.1685	3.5258	4.2525	7.2705	0.222
FW_2011	mrMLM	SNP_IGA_275189	2	22195492	-16.1699	5.2172	6.0219	8.9262	0.1556
FW_2011	mrMLM	SNP_IGA_298935	3	3989094	13.582	6.6713	7.526	7.6839	0.4291
FW_2011	mrMLM	SNP_IGA_404442	4	9321093	-15.9518	3.7213	4.4586	11.5473	0.2105
FW_2011	mrMLM	SNP_IGA_596977	5	13648116	-14.3662	3.7867	4.5274	6.4231	0.1293
FW_2011	mrMLM	SNP_IGA_652492	6	13508541	-20.3077	4.9867	5.7823	11.0038	0.1041
FW_2011	FASTmrMLM	SNP_IGA_1129	1	209701	-11.135	3.5258	4.2525	5.9458	0.221
FW_2011	FASTmrMLM	SNP_IGA_275189	2	22195492	-12.8855	5.2172	6.0219	6.4832	0.1549
FW_2011	FASTmrMLM	SNP_IGA_298935	3	3989094	12.4182	6.6713	7.526	7.347	0.4282
FW_2011	FASTmrMLM	SNP_IGA_404442	4	9321093	-13.7099	3.7213	4.4586	9.7559	0.2096
FW_2011	FASTmrMLM	SNP_IGA_596977	5	13648116	-12.3099	3.7867	4.5274	5.394	0.1287
FW_2011	FASTmrMLM	SNP_IGA_652492	6	13508541	-16.675	4.9867	5.7823	8.4857	0.1036
FW_2011	FASTmrEMMA	SNP_IGA_1129	1	209701	-35.5565	8.6081	9.5153	8.5091	0.221
FW_2011	FASTmrEMMA	SNP_IGA_275189	2	22195492	-20.3329	3.392	4.1111	2.1814	0.1549
FW_2011	FASTmrEMMA	SNP_IGA_595424	5	12884759	-31.5878	6.7757	7.6336	5.5047	0.2096
FW_2011	FASTmrEMMA	SNP_IGA_652492	6	13508541	-29.8474	4.4151	5.1863	3.1203	0.1036
FW_2011	pLARmEB	SNP_IGA_1129	1	209701	-12.3288	4.1633	4.9228	4.2924	0.221
FW_2011	pLARmEB	SNP_IGA_104819	1	34325189	-11.6129	4.8572	5.6475	2.2164	0.4066
FW_2011	pLARmEB	SNP_IGA_275189	2	22195492	-16.0425	7.2681	8.1403	5.9179	0.1549
FW_2011	pLARmEB	SNP_IGA_298935	3	3989094	14.3944	7.9757	8.8671	5.8132	0.4282
FW_2011	pLARmEB	SNP_IGA_652492	6	13508541	-11.922	3.0641	3.7634	2.5544	0.1036
FW_2011	pKWmEB	SNP_IGA_1129	1	209701	-11.286	4.6693	5.4517	8.1307	0.222
FW_2011	pKWmEB	SNP_IGA_404442	4	9321093	-15.9216	4.8646	5.6552	15.7317	0.2105
FW_2011	pKWmEB	SNP_IGA_595424	5	12884759	-12.3839	4.4671	5.2406	8.407	0.2105
FW_2011	pKWmEB	SNP_IGA_652492	6	13508541	-16.9491	5.3042	6.1122	13.8097	0.1041
FW_2011	ISIS EM-BLASSO	SNP_IGA_1129	1	209701	-12.2802	4.3088	5.0751	7.0181	0.221
FW_2011	ISIS EM-BLASSO	SNP_IGA_275189	2	22195492	-13.7172	5.8833	6.7123	7.1302	0.1549
FW_2011	ISIS EM-BLASSO	SNP_IGA_298935	3	3989094	12.7734	7.0829	7.9498	7.5437	0.4282
FW_2011	ISIS EM-BLASSO	SNP_IGA_404442	4	9321093	-14.4569	4.0894	4.8453	10.5274	0.2096
FW_2011	ISIS EM-BLASSO	SNP_IGA_652492	6	13508541	-17.3796	5.2879	6.0953	8.9458	0.1036
FW_2012	mrMLM	SNP_IGA_89193	1	27244316	-24.6217	10.1401	11.0813	19.4369	0.1756
FW_2012	mrMLM	SNP_IGA_439186	4	15742278	18.5136	9.0847	10.003	11.8925	0.2425
FW_2012	mrMLM	SNP_IGA_678844	6	23384329	17.6853	4.4681	5.2417	9.1124	0.1519
FW_2012	mrMLM	SNP_IGA_699516	6	29491714	-14.6307	5.8233	6.6503	7.2238	0.3459
FW_2012	mrMLM	SNP_IGA_604795	6	3980797	-14.0899	4.9026	5.6948	6.4352	0.2047
FW_2012	mrMLM	SNP_IGA_714207	7	2810367	-13.6645	4.8844	5.6758	5.9695	0.2004
FW_2012	FASTmrMLM	SNP_IGA_89193	1	27244316	-22.2594	10.4091	11.3557	18.0029	0.1749
FW_2012	FASTmrMLM	SNP_IGA_439186	4	15742278	17.0052	10.1437	11.0849	11.3704	0.2425
FW_2012	FASTmrMLM	SNP_IGA_604795	6	3980797	-11.7236	3.0012	3.6965	5.0489	0.206
FW_2012	FASTmrMLM	SNP_IGA_678844	6	23384329	14.6468	4.1453	4.9039	7.083	0.1524
FW_2012	FASTmrMLM	SNP_IGA_699516	6	29491714	-13.1062	6.4704	7.3188	6.5693	0.3444
FW_2012	FASTmrMLM	SNP_IGA_714207	7	2810367	-11.4404	6.0427	6.8772	4.742	0.2006
FW_2012	FASTmrEMMA	SNP_IGA_439186	4	15742278	29.2682	6.0212	6.8549	4.1479	0.2425
FW_2012	pLARmEB	SNP_IGA_89193	1	27244316	-15.9468	4.724	5.5087	8.5107	0.1749
FW_2012	pLARmEB	SNP_IGA_252707	2	15840241	-9.7857	4.1729	4.9329	3.4644	0.2414
FW_2012	pLARmEB	SNP_IGA_309473	3	6571458	9.8937	5.0032	5.7995	3.549	0.3273
FW_2012	pLARmEB	SNP_IGA_379393	4	1391180	11.6172	7.103	7.9705	4.7714	0.3326
FW_2012	pLARmEB	SNP_IGA_381612	4	2438391	9.8088	5.4483	6.2618	3.0684	0.4238
FW_2012	pLARmEB	SNP_IGA_439186	4	15742278	17.0012	10.3246	11.2695	10.4685	0.2425
FW_2012	pLARmEB	SNP_IGA_608856	6	3801424	-12.9458	6.2367	7.0776	5.7428	0.2189
FW_2012	pLARmEB	SNP_IGA_699516	6	29491714	-12.6394	6.2676	7.1095	5.6276	0.3444
FW_2012	pKWmEB	SNP_IGA_89193	1	27244316	-15.6243	4.9833	5.7788	11.6876	0.1756
FW_2012	pKWmEB	SNP_IGA_78954	1	23305178	12.5961	5.826	6.653	6.4301	0.1907
FW_2012	pKWmEB	SNP_IGA_439186	4	15742278	15.9526	9.0522	9.9698	13.3892	0.2425
FW_2012	pKWmEB	SNP_IGA_379393	4	1391180	8.1751	3.5374	4.2647	4.1001	0.333
FW_2012	pKWmEB	SNP_IGA_595786	5	13019899	-10.8019	4.3453	5.1133	5.594	0.4849
FW_2012	pKWmEB	SNP_IGA_699516	6	29491714	-10.8928	4.7007	5.4844	7.724	0.3459
FW_2012	pKWmEB	SNP_IGA_608856	6	3801424	-7.5965	3.358	4.0752	5.5103	0.2177
FW_2012	ISIS EM-BLASSO	SNP_IGA_258996	2	17241241	-9.6608	3.8353	4.5785	3.8262	0.2242
FW_2012	ISIS EM-BLASSO	SNP_IGA_309473	3	6571458	13.3242	7.3964	8.2722	7.426	0.3273
FW_2012	ISIS EM-BLASSO	SNP_IGA_379393	4	1391180	9.5166	4.3382	5.1059	3.6939	0.3326
FW_2012	ISIS EM-BLASSO	SNP_IGA_381612	4	2438391	7.8756	4.6031	5.3826	2.2821	0.4238
FW_2012	ISIS EM-BLASSO	SNP_IGA_439186	4	15742278	17.7215	10.4022	11.3487	13.1222	0.2425
FW_2012	ISIS EM-BLASSO	SNP_IGA_604795	6	3980797	-11.3413	5.3521	6.162	5.021	0.206
FW_2012	ISIS EM-BLASSO	snp_6_21067422	6	22931779	11.3106	6.6511	7.5052	5.4125	0.3004
FW_2012	ISIS EM-BLASSO	SNP_IGA_699516	6	29491714	-12.7624	5.1953	5.9991	6.6194	0.3444
FW_2012	ISIS EM-BLASSO	SNP_IGA_714572	7	2759820	-10.1956	4.057	4.8114	4.3178	0.2414
FF_2010	pLARmEB	SNP_IGA_477941	4	19894211	4.7214	3.4198	4.1405	7.1797	0.2222
FF_2010	ISIS EM-BLASSO	SNP_IGA_381612	4	2438391	3.5736	3.1427	3.847	6.9768	0.4514
FF_2010	ISIS EM-BLASSO	SNP_IGA_477941	4	19894211	6.0676	6.494	7.3432	10.9688	0.2222
FF_2010	ISIS EM-BLASSO	SNP_IGA_543179	5	246971	-5.4052	3.4336	4.1551	17.272	0.1493
FF_2011	FASTmrMLM	SNP_IGA_379393	4	1391180	-3.3604	3.7466	4.4852	7.7815	0.2833
FF_2011	FASTmrMLM	SNP_IGA_440116	4	16084694	2.9786	4.1645	4.9241	5.8923	0.2291
FF_2011	FASTmrMLM	SNP_IGA_569246	5	5176794	8.665	3.3308	4.0464	4.569	0.4887
FF_2011	FASTmrEMMA	SNP_IGA_379393	4	1391180	-6.4423	3.0208	3.7174	2.5321	0.2833
FF_2011	pLARmEB	SNP_IGA_134730	1	43578596	3.6923	6.9807	7.8447	6.3504	0.3488
FF_2011	pLARmEB	SNP_IGA_197214	2	6650126	2.6644	3.2764	3.9888	2.9527	0.3318
FF_2011	pLARmEB	SNP_IGA_379856	4	1477791	4.1855	7.8973	8.7866	4.0347	0.4074
FF_2011	pLARmEB	SNP_IGA_516318	4	22817918	6.7164	9.8033	10.7374	15.6895	0.3758
FF_2011	pLARmEB	SNP_IGA_569246	5	5176794	9.7146	3.7241	4.4615	3.8801	0.4887
FF_2011	pKWmEB	SNP_IGA_379393	4	1391180	-3.3065	6.8096	7.6685	16.4795	0.2823
FF_2011	ISIS EM-BLASSO	SNP_IGA_135229	1	43271586	2.7464	3.2423	3.9526	4.8	0.3194
FF_2011	ISIS EM-BLASSO	SNP_IGA_379393	4	1391180	-4.2727	6.858	7.7183	12.5802	0.2833
FF_2011	ISIS EM-BLASSO	SNP_IGA_569246	5	5176794	8.9092	3.4166	4.1371	4.8301	0.4887
FF_2012	mrMLM	SNP_IGA_126158	1	46430951	7.0724	3.3439	4.0602	16.432	0.2722
FF_2012	mrMLM	SNP_IGA_238423	2	201667	-14.479	5.5628	6.3805	12.0134	0.0271
FF_2012	mrMLM	SNP_IGA_411637	4	10981971	-5.0067	5.7641	6.589	8.1591	0.2592
FF_2012	mrMLM	SNP_IGA_399280	4	7078191	5.6787	4.1615	4.9209	10.2013	0.3514
FF_2012	mrMLM	SNP_IGA_883777	8	20973066	-6.2926	3.2668	3.9786	6.2426	0.0748
FF_2012	FASTmrMLM	SNP_IGA_126158	1	46430951	5.0275	4.059	4.8135	11.1047	0.2711
FF_2012	FASTmrMLM	SNP_IGA_238423	2	201667	-9.5102	4.2691	5.0336	6.9314	0.027
FF_2012	FASTmrMLM	SNP_IGA_379856	4	1477791	3.3276	3.8414	4.585	3.146	0.4946
FF_2012	FASTmrMLM	SNP_IGA_411161	4	10922075	-3.6793	6.3896	7.2355	5.9727	0.3175
FF_2012	FASTmrEMMA	SNP_IGA_379856	4	1477791	6.2307	3.3227	4.0378	1.7192	0.4946
FF_2012	FASTmrEMMA	SNP_IGA_409994	4	10605658	12.0084	9.8858	10.8217	9.1781	0.4676
FF_2012	FASTmrEMMA	SNP_IGA_411161	4	10922075	-6.5309	4.3203	5.0872	2.1641	0.3175
FF_2012	pLARmEB	SNP_IGA_98170	1	30490945	-11.7253	7.1536	8.0226	14.1711	0.4633
FF_2012	pLARmEB	SNP_IGA_126158	1	46430951	4.783	3.8888	4.6348	8.6027	0.2711
FF_2012	pLARmEB	SNP_IGA_324067	3	10189798	3.4859	4.6441	5.4254	4.6004	0.2991
FF_2012	pLARmEB	SNP_IGA_379856	4	1477791	3.6091	4.8864	5.6779	3.1675	0.4946
FF_2012	pLARmEB	SNP_IGA_411161	4	10922075	-4.7428	9.7617	10.695	8.4944	0.3175
FF_2012	pLARmEB	SNP_IGA_604703	6	3937990	-3.3779	3.3722	4.0902	4.0453	0.2203
FF_2012	pLARmEB	SNP_IGA_683611	6	24983185	2.5721	3.4724	4.1961	2.4775	0.3348
FF_2012	pLARmEB	SNP_IGA_864149	8	14501494	-4.4138	6.5083	7.3579	6.1486	0.446
FF_2012	pKWmEB	SNP_IGA_126158	1	46430951	4.2114	3.5544	4.2827	12.4462	0.2722
FF_2012	pKWmEB	SNP_IGA_311196	3	6890057	-2.9786	3.2806	3.9932	2.4436	0.3471
FF_2012	pKWmEB	SNP_IGA_524971	4	23474309	3.468	4.3023	5.0683	1.4833	0.3579
FF_2012	pKWmEB	SNP_IGA_411161	4	10922075	-4.8526	11.2344	12.197	8.0993	0.3189
FF_2012	pKWmEB	SNP_IGA_379856	4	1477791	3.0813	3.2876	4.0006	3.5939	0.4946
FF_2012	pKWmEB	SNP_IGA_409901	4	10582092	3.0546	3.0242	3.721	5.2739	0.4783
FF_2012	pKWmEB	SNP_IGA_690898	6	26989303	2.6056	3.8725	4.6177	2.3794	0.3547
FF_2012	pKWmEB	SNP_IGA_864149	8	14501494	-3.5807	5.8135	6.6401	5.0709	0.4469
FF_2012	pKWmEB	SNP_IGA_873803	8	17491608	8.5808	10.3684	11.3142	21.7259	0.102
FF_2012	ISIS EM-BLASSO	SNP_IGA_98170	1	30490945	-8.4556	3.7049	4.4413	8.5475	0.4633
FF_2012	ISIS EM-BLASSO	SNP_IGA_316301	3	8010393	3.319	4.0649	4.8197	2.2448	0.2592
FF_2012	ISIS EM-BLASSO	SNP_IGA_379856	4	1477791	2.7383	3.0238	3.7206	2.1147	0.4946
FF_2012	ISIS EM-BLASSO	SNP_IGA_386060	4	4021536	5.4476	3.9821	4.7328	11.6119	0.1695
FF_2012	ISIS EM-BLASSO	SNP_IGA_409901	4	10582092	3.2962	4.0373	4.7907	4.1213	0.4773
FF_2012	ISIS EM-BLASSO	SNP_IGA_411161	4	10922075	-4.7311	9.488	10.4153	9.8034	0.3175
FF_2012	ISIS EM-BLASSO	SNP_IGA_499853	4	21722899	3.3292	3.6754	4.4103	2.9453	0.4233
FF_2012	ISIS EM-BLASSO	SNP_IGA_864149	8	14501494	-3.5832	5.8499	6.6778	4.7001	0.446
ADH_2010	mrMLM	SNP_IGA_450629	4	18235458	1.5036	20.2524	21.3391	69.1967	0.39
ADH_2010	FASTmrMLM	SNP_IGA_450629	4	18235458	1.4009	19.9434	21.0268	55.3808	0.3947
ADH_2010	FASTmrEMMA	SNP_IGA_450629	4	18235458	2.3253	17.8969	18.9574	49.1606	0.3947
ADH_2010	pLARmEB	SNP_IGA_387584	4	4601159	0.4898	6.8684	7.729	5.9608	0.1579
ADH_2010	pLARmEB	SNP_IGA_450629	4	18235458	0.7145	8.8243	9.7366	12.9038	0.3947
ADH_2010	pLARmEB	SNP_IGA_467302	4	19028425	0.8501	8.1204	9.0155	16.9724	0.477
ADH_2010	pLARmEB	SNP_IGA_492989	4	21367816	0.7087	4.2527	5.0164	16.5911	0.2632
ADH_2010	pLARmEB	SNP_IGA_516318	4	22817918	0.6449	3.5457	4.2735	11.7706	0.3454
ADH_2010	pKWmEB	SNP_IGA_194572	2	6490248	-0.4458	4.7438	5.5294	8.2183	0.3
ADH_2010	pKWmEB	SNP_IGA_450629	4	18235458	0.6383	10.0334	10.9724	37.9479	0.39
ADH_2010	pKWmEB	SNP_IGA_411188	4	10923251	0.9173	4.2589	5.0229	22.3043	0.2767
ADH_2010	pKWmEB	SNP_IGA_407919	4	10057674	-0.6102	5.3057	6.1138	13.3399	0.39
ADH_2010	ISIS EM-BLASSO	SNP_IGA_387584	4	4601159	0.3936	3.0746	3.7746	6.2209	0.1579
ADH_2010	ISIS EM-BLASSO	SNP_IGA_450629	4	18235458	0.9666	12.6668	13.6545	38.1635	0.3947
ADH_2010	ISIS EM-BLASSO	SNP_IGA_467302	4	19028425	0.6348	7.8285	8.716	15.2932	0.477
ADH_2011	mrMLM	SNP_IGA_467302	4	19028425	1.0975	60.0704	61.3887	18.962	0.3393
ADH_2011	mrMLM	SNP_IGA_477941	4	19894211	0.7966	25.3555	26.4899	11.1913	0.3246
ADH_2011	mrMLM	SNP_IGA_410398	4	10696489	0.3164	4.5466	5.3237	2.8423	0.4979
ADH_2011	mrMLM	SNP_IGA_441749	4	16584598	0.8645	12.3984	13.3816	24.1256	0.3172
ADH_2011	mrMLM	SNP_IGA_446745	4	17587156	-0.42	5.6891	6.5113	5.4446	0.4454
ADH_2011	mrMLM	SNP_IGA_387584	4	4601159	0.3922	4.4426	5.215	4.4964	0.2017
ADH_2011	mrMLM	SNP_IGA_415382	4	12546297	-0.3024	4.0227	4.7754	1.5944	0.2899
ADH_2011	mrMLM	snp_scaffold_4_27671771	4	24069122	0.46	5.2325	6.0378	6.0858	0.1628
ADH_2011	mrMLM	SNP_IGA_411147	4	10921604	0.3749	3.8281	4.571	4.898	0.2553
ADH_2011	FASTmrMLM	SNP_IGA_441507	4	16511312	0.584	8.6526	9.5608	8.4332	0.4226
ADH_2011	FASTmrMLM	SNP_IGA_441749	4	16584598	0.9822	11.4828	12.4499	33.1353	0.318
ADH_2011	FASTmrMLM	SNP_IGA_467302	4	19028425	0.6674	6.0597	6.8947	7.4589	0.34
ADH_2011	FASTmrMLM	SNP_IGA_477945	4	19895212	0.6709	13.882	14.8889	8.5436	0.3285
ADH_2011	FASTmrMLM	SNP_IGA_508045	4	22290969	0.5008	7.593	8.4742	6.9588	0.4707
ADH_2011	FASTmrMLM	snp_scaffold_4_27671771	4	24069122	0.4409	6.2259	7.0665	5.9483	0.1621
ADH_2011	FASTmrEMMA	SNP_IGA_467302	4	19028425	2.3033	63.1422	64.4712	30.4003	0.34
ADH_2011	FASTmrEMMA	SNP_IGA_477951	4	19895639	1.5385	23.4293	24.5469	14.7717	0.3264
ADH_2011	pLARmEB	SNP_IGA_40406	1	13527092	-0.4522	4.7376	5.5229	6.2015	0.2082
ADH_2011	pLARmEB	SNP_IGA_381612	4	2438391	-0.2043	3.6435	4.3766	1.036	0.4969
ADH_2011	pLARmEB	SNP_IGA_387584	4	4601159	0.3488	4.9595	5.754	3.1829	0.2008
ADH_2011	pLARmEB	SNP_IGA_411147	4	10921604	0.5051	6.1906	7.03	7.957	0.2542
ADH_2011	pLARmEB	SNP_IGA_415382	4	12546297	-0.2863	3.7374	4.4755	1.2788	0.2929
ADH_2011	pLARmEB	SNP_IGA_441749	4	16584598	0.2914	3.3978	4.1173	2.4528	0.318
ADH_2011	pLARmEB	SNP_IGA_467302	4	19028425	1.1754	60.536	61.856	19.463	0.34
ADH_2011	pLARmEB	SNP_IGA_477941	4	19894211	0.8311	29.3849	30.5507	10.9015	0.3274
ADH_2011	pLARmEB	SNP_IGA_532542	4	24984572	0.2296	3.0097	3.7056	1.6031	0.3515
ADH_2011	pKWmEB	SNP_IGA_245182	2	14147049	-0.3108	8.8612	9.7744	4.5892	0.3498
ADH_2011	pKWmEB	SNP_IGA_192643	2	6261644	0.2587	6.5068	7.3564	2.1108	0.3319
ADH_2011	pKWmEB	SNP_IGA_467302	4	19028425	1.2396	68.6068	69.9535	19.8353	0.3393
ADH_2011	pKWmEB	SNP_IGA_411147	4	10921604	0.947	10.4951	11.4434	29.5585	0.2553
ADH_2011	pKWmEB	SNP_IGA_477951	4	19895639	0.7527	32.5341	33.7216	11.0027	0.3235
ADH_2011	pKWmEB	SNP_IGA_441749	4	16584598	0.4227	8.0975	8.992	6.0432	0.3172
ADH_2011	pKWmEB	SNP_IGA_410478	4	10760086	-0.6557	7.5401	8.4199	10.2556	0.2836
ADH_2011	ISIS EM-BLASSO	SNP_IGA_2791	1	917314	0.2039	3.1829	3.8896	1.2568	0.1444
ADH_2011	ISIS EM-BLASSO	SNP_IGA_107619	1	35529762	0.2529	4.9886	5.7843	2.2362	0.1956
ADH_2011	ISIS EM-BLASSO	SNP_IGA_340919	3	17707725	0.2118	3.7527	4.4917	0.4316	0.2343
ADH_2011	ISIS EM-BLASSO	SNP_IGA_409379	4	10389254	-0.3944	6.1141	6.951	6.2306	0.2427
ADH_2011	ISIS EM-BLASSO	SNP_IGA_410165	4	10641209	-0.2976	5.8283	6.6554	3.3017	0.4331
ADH_2011	ISIS EM-BLASSO	SNP_IGA_411147	4	10921604	0.6581	12.9644	13.957	17.6981	0.2542
ADH_2011	ISIS EM-BLASSO	SNP_IGA_441749	4	16584598	0.2981	4.0747	4.8299	3.3646	0.318
ADH_2011	ISIS EM-BLASSO	SNP_IGA_467302	4	19028425	1.0491	38.908	40.1336	20.3131	0.34
ADH_2011	ISIS EM-BLASSO	SNP_IGA_477951	4	19895639	0.8384	34.6658	35.8668	14.3662	0.3264
ADH_2011	ISIS EM-BLASSO	SNP_IGA_614273	6	1946261	-0.2193	3.4449	4.167	1.9399	0.2615
ADH_2012	mrMLM	SNP_IGA_127673	1	45841357	-0.4807	4.2308	4.9935	6.9113	0.1231
ADH_2012	mrMLM	SNP_IGA_366997	3	26642299	-0.6568	4.4648	5.2382	10.6052	0.086
ADH_2012	mrMLM	SNP_IGA_411147	4	10921604	0.5697	6.2667	7.1086	13.8067	0.2176
ADH_2012	mrMLM	SNP_IGA_528949	4	24187959	0.6092	19.7407	20.822	7.4206	0.3471
ADH_2012	mrMLM	SNP_IGA_410398	4	10696489	0.4117	7.229	8.1001	6.5303	0.4257
ADH_2012	mrMLM	snp_6_13059650	6	13073956	-0.4878	6.8852	7.7463	10.2349	0.2463
ADH_2012	mrMLM	SNP_IGA_631572	6	8704993	-0.6633	7.3938	8.2696	10.3877	0.0892
ADH_2012	FASTmrMLM	SNP_IGA_127673	1	45841357	-0.3975	3.6791	4.4142	5.5066	0.1226
ADH_2012	FASTmrMLM	SNP_IGA_366997	3	26642299	-0.5779	5.6446	6.4652	9.5651	0.0867
ADH_2012	FASTmrMLM	SNP_IGA_411147	4	10921604	0.5819	7.1949	8.0651	16.7834	0.2167
ADH_2012	FASTmrMLM	SNP_IGA_478039	4	19905780	0.2606	4.1111	4.8681	1.7485	0.3636
ADH_2012	FASTmrMLM	SNP_IGA_528949	4	24187959	0.6124	14.987	16.0101	8.7395	0.3488
ADH_2012	FASTmrMLM	SNP_IGA_631572	6	8704993	-0.5287	4.0427	4.7964	7.6889	0.0899
ADH_2012	FASTmrMLM	snp_6_13059650	6	13073956	-0.3482	4.8502	5.6402	6.0745	0.2463
ADH_2012	FASTmrEMMA	SNP_IGA_411147	4	10921604	0.837	5.4372	6.2502	2.1698	0.2167
ADH_2012	pLARmEB	SNP_IGA_353457	3	21609438	0.2832	5.0998	5.8999	2.1356	0.3858
ADH_2012	pLARmEB	SNP_IGA_367325	3	26894937	0.2791	4.4354	5.2075	3.9302	0.278
ADH_2012	pLARmEB	SNP_IGA_410165	4	10641209	-0.222	3.9713	4.7214	1.8838	0.4947
ADH_2012	pLARmEB	SNP_IGA_411147	4	10921604	0.4358	4.5452	5.3222	9.41	0.2167
ADH_2012	pLARmEB	SNP_IGA_467302	4	19028425	0.6998	18.0287	19.0908	6.5931	0.2907
ADH_2012	pLARmEB	SNP_IGA_478039	4	19905780	0.4279	8.2835	9.1827	4.7151	0.3636
ADH_2012	pLARmEB	snp_6_13059650	6	13073956	-0.3063	4.0624	4.817	4.7016	0.2463
ADH_2012	pLARmEB	SNP_IGA_683620	6	24985094	0.2946	3.3087	4.023	3.5398	0.1512
ADH_2012	pLARmEB	SNP_IGA_779224	7	15717070	0.3375	3.7889	4.5297	3.8317	0.4461
ADH_2012	pKWmEB	SNP_IGA_411147	4	10921604	0.4957	8.3994	9.3015	19.1842	0.2176
ADH_2012	pKWmEB	SNP_IGA_419699	4	13652399	-0.4375	3.5325	4.2596	7.8882	0.2643
ADH_2012	pKWmEB	SNP_IGA_467302	4	19028425	0.6041	6.2812	7.1236	6.5244	0.2898
ADH_2012	pKWmEB	SNP_IGA_596332	5	13382779	0.3297	5.49	6.305	6.4233	0.3493
ADH_2012	pKWmEB	SNP_IGA_683620	6	24985094	0.4913	7.2137	8.0844	14.3807	0.1518
ADH_2012	pKWmEB	SNP_IGA_834158	8	10852394	0.2269	3.0424	3.7404	3.4504	0.3524
ADH_2012	pKWmEB	SNP_IGA_836857	8	10342308	0.29	6.2843	7.1268	4.5002	0.3949
ADH_2012	ISIS EM-BLASSO	SNP_IGA_353457	3	21609438	0.3087	3.753	4.492	2.2973	0.3858
ADH_2012	ISIS EM-BLASSO	SNP_IGA_364036	3	25258726	-0.618	5.4229	6.2354	16.9594	0.2188
ADH_2012	ISIS EM-BLASSO	SNP_IGA_367325	3	26894937	0.3381	5.529	6.3454	5.2203	0.278
ADH_2012	ISIS EM-BLASSO	SNP_IGA_411147	4	10921604	0.5243	7.3561	8.2308	12.3349	0.2167
ADH_2012	ISIS EM-BLASSO	SNP_IGA_467302	4	19028425	0.6602	23.1785	24.2938	5.3123	0.2907
ADH_2012	ISIS EM-BLASSO	snp_6_13059650	6	13073956	-0.4581	8.5232	9.4283	9.5202	0.2463
ADH_2012	ISIS EM-BLASSO	SNP_IGA_683620	6	24985094	0.4838	4.1582	4.9175	8.6416	0.1512
RP_2010	mrMLM	SNP_IGA_343288	3	18666687	-0.4412	9.4632	10.39	55.2384	0.3801
RP_2010	mrMLM	SNP_IGA_431437	3	11211896	-0.1958	3.7899	4.5308	3.657	0.2226
RP_2010	mrMLM	SNP_IGA_410398	4	10696489	-0.2214	4.6745	5.4571	9.0363	0.3356
RP_2010	FASTmrEMMA	SNP_IGA_381612	4	2438391	0.2287	3.1226	3.8256	4.2511	0.4493
RP_2010	FASTmrEMMA	SNP_IGA_410398	4	10696489	-0.3365	4.3695	5.1386	7.755	0.3446
RP_2010	pLARmEB	SNP_IGA_341962	3	18179421	-0.3169	11.9853	12.9614	21.7759	0.2162
RP_2010	ISIS EM-BLASSO	SNP_IGA_341962	3	18179421	-0.3168	11.9853	12.9614	23.5919	0.2162
RP_2011	mrMLM	SNP_IGA_410398	4	10696489	-0.2301	15.2054	16.2315	19.6811	0.4989
RP_2011	mrMLM	SNP_IGA_411147	4	10921604	-0.1392	3.5446	4.2723	8.837	0.2553
RP_2011	mrMLM	SNP_IGA_399858	4	7161945	-0.2043	9.0448	9.9622	17.3861	0.1966
RP_2011	mrMLM	SNP_IGA_698951	6	29242212	0.119	4.9478	5.7418	6.4483	0.3365
RP_2011	FASTmrMLM	SNP_IGA_410398	4	10696489	-0.1527	7.8371	8.7249	10.0268	0.4968
RP_2011	FASTmrMLM	SNP_IGA_411147	4	10921604	-0.1605	6.0164	6.85	13.5881	0.2543
RP_2011	FASTmrMLM	SNP_IGA_698951	6	29242212	0.1268	6.4673	7.3156	8.4789	0.3351
RP_2011	FASTmrEMMA	SNP_IGA_410398	4	10696489	-0.2878	6.064	6.8992	6.1606	0.4968
RP_2011	FASTmrEMMA	SNP_IGA_698951	6	29242212	0.2951	9.296	10.2191	6.0104	0.3351
RP_2011	pLARmEB	SNP_IGA_110863	1	36728160	0.1027	4.1186	4.876	4.1176	0.2277
RP_2011	pLARmEB	SNP_IGA_341962	3	18179421	-0.2308	12.0937	13.0717	5.9176	0.233
RP_2011	pLARmEB	SNP_IGA_408223	4	10107085	-0.1002	4.2432	5.0065	4.1219	0.2819
RP_2011	pLARmEB	SNP_IGA_410398	4	10696489	-0.1924	12.4586	13.4428	12.4962	0.4968
RP_2011	pLARmEB	SNP_IGA_411147	4	10921604	-0.2	6.599	7.4514	16.5497	0.2543
RP_2011	pLARmEB	SNP_IGA_698951	6	29242212	0.1289	9.0788	9.997	6.871	0.3351
RP_2011	pKWmEB	SNP_IGA_196907	2	6640367	0.1155	4.7889	5.5764	5.0033	0.2927
RP_2011	pKWmEB	SNP_IGA_343288	3	18666687	-0.2009	4.8426	5.6323	23.8915	0.3707
RP_2011	pKWmEB	SNP_IGA_330725	3	16198112	0.0985	4.2076	4.9692	7.4032	0.1902
RP_2011	pKWmEB	SNP_IGA_344628	3	19101956	-0.1512	11.445	12.4114	12.9726	0.312
RP_2011	pKWmEB	SNP_IGA_410398	4	10696489	-0.1495	7.9689	8.8601	12.7609	0.4989
RP_2011	pKWmEB	SNP_IGA_524971	4	23474309	-0.0518	3.2864	3.9993	0.6575	0.4049
RP_2011	pKWmEB	SNP_IGA_384604	4	3436488	0.1083	7.3614	8.2363	2.4023	0.3835
RP_2011	ISIS EM-BLASSO	SNP_IGA_306024	3	5365326	-0.0776	3.1986	3.9063	2.8897	0.4202
RP_2011	ISIS EM-BLASSO	SNP_IGA_399858	4	7161945	-0.1662	7.8433	8.7312	13.3178	0.1968
RP_2011	ISIS EM-BLASSO	SNP_IGA_410398	4	10696489	-0.1544	7.2497	8.1214	10.2576	0.4968
RP_2011	ISIS EM-BLASSO	SNP_IGA_411147	4	10921604	-0.1697	7.0055	7.8702	15.1853	0.2543
RP_2011	ISIS EM-BLASSO	SNP_IGA_698951	6	29242212	0.1086	4.1525	4.9115	6.211	0.3351
RP_2012	mrMLM	SNP_IGA_170129	2	4829886	-0.1718	3.7027	4.439	8.5821	0.1123
RP_2012	mrMLM	SNP_IGA_410398	4	10696489	-0.2022	12.07	13.0476	15.5373	0.4258
RP_2012	mrMLM	SNP_IGA_411637	4	10981971	-0.1713	8.4744	9.3783	12.3268	0.2574
RP_2012	FASTmrMLM	SNP_IGA_170129	2	4829886	-0.1142	3.0208	3.7174	3.7898	0.1118
RP_2012	FASTmrMLM	SNP_IGA_410398	4	10696489	-0.1783	10.2922	11.2365	12.0804	0.4251
RP_2012	FASTmrMLM	SNP_IGA_411147	4	10921604	-0.2235	9.8461	10.7811	20.9815	0.2173
RP_2012	FASTmrEMMA	SNP_IGA_410398	4	10696489	-0.373	10.3632	11.3089	7.3501	0.4251
RP_2012	pLARmEB	SNP_IGA_291248	3	1041872	0.1437	4.099	4.8554	5.9407	0.1371
RP_2012	pLARmEB	SNP_IGA_410165	4	10641209	0.1859	14.9449	15.9674	9.493	0.4947
RP_2012	pLARmEB	SNP_IGA_411147	4	10921604	-0.1993	7.9252	8.8153	14.1774	0.2173
RP_2012	pLARmEB	SNP_IGA_804739	8	2702428	0.189	6.5076	7.3572	9.9752	0.1466
RP_2012	pKWmEB	SNP_IGA_412662	4	11298736	-0.2163	3.9258	4.6737	31.8474	0.1864
RP_2012	pKWmEB	SNP_IGA_379393	4	1391180	0.0302	3.1043	3.8062	2.7196	0.3305
RP_2012	pKWmEB	SNP_IGA_804739	8	2702428	0.1486	5.394	6.2054	13.2056	0.1462
RP_2012	ISIS EM-BLASSO	SNP_IGA_291248	3	1041872	0.1427	4.4267	5.1984	6.8939	0.1371
RP_2012	ISIS EM-BLASSO	SNP_IGA_408223	4	10107085	-0.0521	3.2577	3.9689	1.1574	0.3238
RP_2012	ISIS EM-BLASSO	SNP_IGA_411147	4	10921604	-0.2092	9.2298	10.1514	18.3849	0.2173
RP_2012	ISIS EM-BLASSO	SNP_IGA_616074	6	1431078	0.0969	5.0632	5.8619	3.7486	0.212
RP_2012	ISIS EM-BLASSO	SNP_IGA_804739	8	2702428	0.1805	6.1693	7.008	10.7061	0.1466
FT_2010	mrMLM	SNP_IGA_272372	2	21315836	0.2021	10.3387	11.2839	23.504	0.1497
FT_2010	mrMLM	SNP_IGA_477941	4	19894211	0.3691	8.7941	9.7057	46.3074	0.2177
FT_2010	mrMLM	SNP_IGA_374610	4	994306	0.114	9.3967	10.322	4.8336	0.2891
FT_2010	FASTmrMLM	SNP_IGA_272372	2	21315836	0.1812	9.2992	10.2224	25.8852	0.1477
FT_2010	FASTmrMLM	SNP_IGA_374610	4	994306	0.1473	7.6405	8.523	11.0636	0.2987
FT_2010	FASTmrMLM	SNP_IGA_441507	4	16511312	0.0786	3.6232	4.3552	2.6014	0.3188
FT_2010	FASTmrMLM	SNP_IGA_450629	4	18235458	0.1135	3.0111	3.7071	10.3676	0.3826
FT_2010	FASTmrMLM	SNP_IGA_543474	5	329318	0.148	4.2667	5.0311	10.6873	0.0772
FT_2010	FASTmrEMMA	SNP_IGA_374610	4	994306	0.2719	6.3666	7.2117	10.319	0.2987
FT_2010	pLARmEB	SNP_IGA_272372	2	21315836	0.1841	11.1335	12.0942	19.632	0.1477
FT_2010	pLARmEB	SNP_IGA_374610	4	994306	0.1435	9.2837	10.2065	7.714	0.2987
FT_2010	pLARmEB	SNP_IGA_477941	4	19894211	0.3165	9.5498	10.4785	34.2918	0.2282
FT_2010	pLARmEB	SNP_IGA_543474	5	329318	0.1684	4.4905	5.2651	10.1682	0.0772
FT_2010	ISIS EM-BLASSO	SNP_IGA_258340	2	17040217	0.3091	15.3873	16.4159	29.434	0.094
FT_2010	ISIS EM-BLASSO	SNP_IGA_477941	4	19894211	0.388	30.9794	32.1565	37.7529	0.2282
FT_2010	ISIS EM-BLASSO	SNP_IGA_543474	5	329318	0.2499	9.4093	10.3349	16.407	0.0772
FT_2011	mrMLM	SNP_IGA_38386	1	13139965	-0.1615	6.0457	6.8803	3.4518	0.4718
FT_2011	mrMLM	SNP_IGA_356864	3	22453019	0.4453	5.6009	6.42	7.6341	0.4718
FT_2011	mrMLM	SNP_IGA_386060	4	4021536	0.282	5.8659	6.6943	12.2574	0.1701
FT_2011	mrMLM	SNP_IGA_545448	5	850261	-0.3206	5.0679	5.8667	15.2957	0.1682
FT_2011	mrMLM	SNP_IGA_559057	5	3731800	0.3577	10.7252	11.6781	16.6774	0.1344
FT_2011	mrMLM	SNP_IGA_544961	5	698215	-0.2073	3.0832	3.7837	6.745	0.1889
FT_2011	mrMLM	SNP_IGA_866041	8	15002010	0.1952	4.2206	4.9828	0.8741	0.1118
FT_2011	FASTmrMLM	SNP_IGA_38386	1	13139965	-0.1659	8.1454	9.0411	3.6884	0.4738
FT_2011	FASTmrMLM	SNP_IGA_411637	4	10981971	-0.0902	3.8724	4.6176	1.4471	0.2931
FT_2011	FASTmrMLM	SNP_IGA_545448	5	850261	-0.4737	26.5974	27.742	33.8019	0.1676
FT_2011	FASTmrMLM	SNP_IGA_559057	5	3731800	0.3379	11.2044	12.1664	15.0681	0.1339
FT_2011	FASTmrMLM	SNP_IGA_866041	8	15002010	0.1967	3.6741	4.4089	0.8984	0.1142
FT_2011	FASTmrEMMA	SNP_IGA_545448	5	850261	-1.0793	30.6882	31.8633	18.485	0.1676
FT_2011	FASTmrEMMA	SNP_IGA_555093	5	2962831	0.6405	12.825	13.8153	9.6292	0.2734
FT_2011	pLARmEB	SNP_IGA_38386	1	13139965	-0.1071	3.8018	4.5433	1.2428	0.4738
FT_2011	pLARmEB	SNP_IGA_104812	1	34324185	-0.1655	4.997	5.793	2.0335	0.4092
FT_2011	pLARmEB	SNP_IGA_197236	2	6650921	0.1281	3.2596	3.971	2.0525	0.3464
FT_2011	pLARmEB	SNP_IGA_386286	4	4056543	0.3005	7.5212	8.4005	11.338	0.1676
FT_2011	pLARmEB	SNP_IGA_396252	4	6331162	0.2147	4.7958	5.5835	6.5709	0.2228
FT_2011	pLARmEB	SNP_IGA_545655	5	882334	-0.3398	13.3983	14.3978	16.1748	0.25
FT_2011	pLARmEB	SNP_IGA_553456	5	2477309	0.2772	7.4688	8.3466	10.1363	0.2107
FT_2011	pLARmEB	snp_6_21067422	6	22931779	0.1079	4.1764	4.9365	1.6614	0.3202
FT_2011	pLARmEB	SNP_IGA_334602	7	8641829	-0.1341	5.4547	6.2684	2.5613	0.2996
FT_2011	pKWmEB	SNP_IGA_111539	1	37242573	0.1664	4.6416	5.4228	7.5945	0.2773
FT_2011	pKWmEB	SNP_IGA_198691	2	6753400	0.1591	6.2522	7.0936	5.1589	0.3731
FT_2011	pKWmEB	SNP_IGA_366194	3	26140317	-0.2384	4.4874	5.2618	5.4174	0.0724
FT_2011	pKWmEB	SNP_IGA_405554	4	9617585	-0.0696	3.4798	4.2039	2.0876	0.39
FT_2011	pKWmEB	SNP_IGA_545448	5	850261	-0.3258	11.5117	12.4794	17.0002	0.1682
FT_2011	pKWmEB	SNP_IGA_559057	5	3731800	0.2529	9.0593	9.977	9.911	0.1344
FT_2011	pKWmEB	snp_6_21067422	6	22931779	0.0877	3.6189	4.3507	2.769	0.3214
FT_2011	pKWmEB	SNP_IGA_769572	7	12248919	-0.263	6.4137	7.2603	7.633	0.11
FT_2011	pKWmEB	SNP_IGA_873491	8	17390242	0.1452	4.1108	4.8678	6.1267	0.219
FT_2011	pKWmEB	SNP_IGA_866041	8	15002010	0.1424	3.768	4.5078	0.785	0.1118
FT_2011	ISIS EM-BLASSO	SNP_IGA_67620	1	20287777	0.1223	3.254	3.965	3.2612	0.3174
FT_2011	ISIS EM-BLASSO	SNP_IGA_198691	2	6753400	0.1812	4.8537	5.6439	7.102	0.3727
FT_2011	ISIS EM-BLASSO	SNP_IGA_559057	5	3731800	0.2577	7.9081	8.7977	10.8059	0.1339
FT_2011	ISIS EM-BLASSO	SNP_IGA_769572	7	12248919	-0.2619	6.4794	7.3281	9.5206	0.1096
FT_2012	mrMLM	SNP_IGA_38730	1	13194171	0.1987	3.4033	4.1231	5.6421	0.1409
FT_2012	mrMLM	SNP_IGA_197214	2	6650126	0.3239	6.9007	7.7623	16.5716	0.3464
FT_2012	mrMLM	SNP_IGA_152082	2	3445500	-0.2144	7.0092	7.874	5.7899	0.465
FT_2012	mrMLM	SNP_IGA_547830	5	1342919	-0.2078	5.1945	5.9983	7.7843	0.2447
FT_2012	mrMLM	SNP_IGA_769572	7	12248919	-0.3296	7.101	7.9685	14.0616	0.1282
FT_2012	mrMLM	SNP_IGA_821894	8	5071328	-0.2372	3.9607	4.7103	6.3666	0.1102
FT_2012	mrMLM	SNP_IGA_881810	8	19901178	-0.1378	3.2649	3.9766	3.4153	0.3347
FT_2012	FASTmrMLM	SNP_IGA_38730	1	13194171	0.1642	3.4037	4.1235	4.1087	0.1403
FT_2012	FASTmrMLM	SNP_IGA_152082	2	3445500	-0.2035	6.9473	7.8103	5.5685	0.4652
FT_2012	FASTmrMLM	SNP_IGA_547830	5	1342919	-0.1903	5.1973	6.0012	6.9681	0.2447
FT_2012	FASTmrMLM	SNP_IGA_769572	7	12248919	-0.3399	7.1039	7.9714	15.9562	0.1276
FT_2012	FASTmrMLM	SNP_IGA_821894	8	5071328	-0.2116	3.9631	4.7128	5.4061	0.1108
FT_2012	FASTmrMLM	SNP_IGA_881810	8	19901178	-0.1187	3.16	3.8653	2.7044	0.3354
FT_2012	FASTmrEMMA	SNP_IGA_197236	2	6650921	0.6037	7.1831	8.0529	4.8288	0.3481
FT_2012	FASTmrEMMA	SNP_IGA_769572	7	12248919	-0.9858	10.3922	11.3385	13.8076	0.1276
FT_2012	FASTmrEMMA	SNP_IGA_821894	8	5071328	-0.4958	3.4899	4.2146	3.3612	0.1108
FT_2012	FASTmrEMMA	SNP_IGA_881810	8	19901178	-0.3311	5.477	6.2916	2.6386	0.3354
FT_2012	pLARmEB	SNP_IGA_87433	1	26783135	0.2972	10.2807	11.2247	9.1043	0.2975
FT_2012	pLARmEB	SNP_IGA_88046	1	26896332	-0.2647	8.4249	9.3276	7.138	0.2827
FT_2012	pLARmEB	SNP_IGA_195134	2	6545323	0.0983	3.882	4.6276	0.7819	0.4947
FT_2012	pLARmEB	SNP_IGA_547830	5	1342919	-0.3727	5.2519	6.0579	14.1211	0.2447
FT_2012	pLARmEB	SNP_IGA_553456	5	2477309	0.3864	3.8501	4.5941	14.5221	0.2194
FT_2012	pLARmEB	SNP_IGA_769572	7	12248919	-0.3251	3.3815	4.1	7.7121	0.1276
FT_2012	pLARmEB	SNP_IGA_821894	8	5071328	-0.2431	6.7758	7.6337	3.7689	0.1108
FT_2012	pKWmEB	SNP_IGA_198691	2	6753400	0.2126	7.5071	8.386	16.3765	0.3909
FT_2012	pKWmEB	SNP_IGA_546467	5	1075596	-0.3121	3.3733	4.0913	17.3892	0.1822
FT_2012	pKWmEB	SNP_IGA_769572	7	12248919	-0.2365	3.3045	4.0185	15.5425	0.1282
FT_2012	pKWmEB	SNP_IGA_866041	8	15002010	-0.1378	3.7175	4.4546	4.1845	0.1282
FT_2012	ISIS EM-BLASSO	SNP_IGA_553456	5	2477309	0.3311	5.8441	6.6718	22.7212	0.2194
FT_2012	ISIS EM-BLASSO	SNP_IGA_821894	8	5071328	-0.1801	3.4951	4.2201	4.4132	0.1108
PW_2010	mrMLM	SNP_IGA_124689	1	47196747	-1.7693	4.0454	4.7992	58.1996	0.2929
PW_2010	mrMLM	SNP_IGA_418341	4	13314544	1.8717	4.6276	5.4082	3.7434	0.05
PW_2010	FASTmrMLM	SNP_IGA_124689	1	47196747	-2.1993	9.4219	10.3478	59.8598	0.2958
PW_2010	FASTmrEMMA	SNP_IGA_418341	4	13314544	4.1968	4.8655	5.6561	18.9491	0.0599
PW_2010	pLARmEB	SNP_IGA_351038	3	20861373	0.9537	9.5646	10.4936	14.6767	0.4049
PW_2010	pLARmEB	SNP_IGA_405554	4	9617585	0.5858	4.2487	5.0122	6.2558	0.4577
PW_2010	pLARmEB	SNP_IGA_450003	4	18140428	1.0584	10.6408	11.592	16.4533	0.3732
PW_2010	pLARmEB	SNP_IGA_609984	6	3294947	0.7035	5.6608	6.482	7.568	0.4437
PW_2010	pLARmEB	SNP_IGA_681970	6	24433718	0.7822	7.7148	8.5993	6.8368	0.4085
PW_2010	ISIS EM-BLASSO	SNP_IGA_351038	3	20861373	0.723	5.6651	6.4865	10.4604	0.4049
PW_2010	ISIS EM-BLASSO	SNP_IGA_411188	4	10923251	0.9789	5.4303	6.2431	24.2209	0.2746
PW_2010	ISIS EM-BLASSO	SNP_IGA_621556	6	5435066	-1.1673	4.9815	5.7769	20.8117	0.1092
PW_2010	ISIS EM-BLASSO	SNP_IGA_682005	6	24455068	0.678	5.4853	6.3001	5.9143	0.3979
PW_2011	mrMLM	SNP_IGA_680747	6	24132839	0.6796	3.5803	4.31	5.5043	0.3701
PW_2011	mrMLM	SNP_IGA_697517	6	28795793	-0.875	6.8034	7.6621	16.9679	0.224
PW_2011	mrMLM	snp_scaffold_8_18584856	8	19329311	-2.3144	4.5423	5.3192	22.184	0.0244
PW_2011	FASTmrMLM	SNP_IGA_680747	6	24132839	0.487	4.5394	5.3161	3.3074	0.3742
PW_2011	FASTmrMLM	SNP_IGA_697517	6	28795793	-0.6061	5.1491	5.9511	9.5268	0.2226
PW_2011	FASTmrMLM	SNP_IGA_879528	8	19234898	-0.5699	4.5281	5.3043	9.0152	0.2532
PW_2011	FASTmrEMMA	SNP_IGA_680747	6	24132839	1.0002	3.9816	4.7323	3.3631	0.3742
PW_2011	FASTmrEMMA	SNP_IGA_697517	6	28795793	-1.5032	7.5539	8.4341	6.5831	0.2226
PW_2011	pLARmEB	SNP_IGA_680747	6	24132839	0.495	5.6429	6.4635	2.766	0.3742
PW_2011	pLARmEB	SNP_IGA_697517	6	28795793	-0.6886	7.0246	7.8898	9.9524	0.2226
PW_2011	pLARmEB	SNP_IGA_701195	6	30386271	0.7582	6.5019	7.3513	12.5496	0.2452
PW_2011	pLARmEB	SNP_IGA_720963	7	1699148	-0.4098	4.6608	5.4428	3.8145	0.279
PW_2011	pLARmEB	SNP_IGA_879528	8	19234898	-0.4908	3.4291	4.1503	5.4108	0.2532
PW_2011	pLARmEB	SNP_IGA_881804	8	19899671	0.3414	3.8371	4.5804	2.6284	0.3452
PW_2011	pKWmEB	SNP_IGA_660429	6	17281323	0.895	3.3331	4.0488	29.6673	0.1169
PW_2011	pKWmEB	SNP_IGA_879528	8	19234898	-0.4495	3.043	3.741	13.1602	0.2549
PW_2011	ISIS EM-BLASSO	SNP_IGA_660044	6	17252030	1.1813	5.0114	5.808	20.1289	0.0839
PW_2011	ISIS EM-BLASSO	SNP_IGA_680747	6	24132839	0.6654	7.679	8.5626	5.6757	0.3742
PW_2011	ISIS EM-BLASSO	SNP_IGA_684503	6	25150900	-0.3993	3.556	4.2844	1.3099	0.3323
PW_2011	ISIS EM-BLASSO	SNP_IGA_697517	6	28795793	-0.6207	5.4273	6.24	9.1855	0.2226
PW_2011	ISIS EM-BLASSO	SNP_IGA_720963	7	1699148	-0.4821	4.3535	5.1219	5.9974	0.279
PW_2011	ISIS EM-BLASSO	SNP_IGA_879528	8	19234898	-0.4216	3.2936	4.007	4.5358	0.2532
PW_2012	mrMLM	SNP_IGA_684085	6	25090090	1.038	3.7981	4.5394	28.6338	0.1488
PW_2012	FASTmrMLM	SNP_IGA_287581	2	28786623	0.2766	3.2674	3.9792	2.6885	0.3177
PW_2012	FASTmrMLM	SNP_IGA_681724	6	24346170	0.6155	3.2486	3.9593	12.8991	0.242
PW_2012	FASTmrMLM	SNP_IGA_684085	6	25090090	0.591	4.3038	5.0699	10.0417	0.1493
PW_2012	pLARmEB	SNP_IGA_88046	1	26896332	-0.4573	5.9691	6.8011	4.2869	0.2836
PW_2012	pLARmEB	SNP_IGA_545655	5	882334	0.3857	4.0284	4.7814	3.0865	0.2783
PW_2012	pLARmEB	SNP_IGA_684085	6	25090090	0.8756	9.1193	10.0384	12.9885	0.1493
PW_2012	pLARmEB	SNP_IGA_687855	6	26042026	-0.3183	3.5106	4.2364	1.6762	0.436
PW_2012	pLARmEB	SNP_IGA_770978	7	12581188	0.4685	5.8998	6.7294	4.5733	0.3657
PW_2012	pLARmEB	SNP_IGA_786363	7	18955387	0.3909	3.0531	3.7517	2.7615	0.1695
PW_2012	pKWmEB	SNP_IGA_344064	3	18831134	0.3633	3.3314	4.047	6.9567	0.2195
PW_2012	pKWmEB	SNP_IGA_681724	6	24346170	0.5975	3.2323	3.942	19.5677	0.242
PW_2012	pKWmEB	SNP_IGA_684085	6	25090090	0.4009	3.6803	4.4154	8.3904	0.1488
PW_2012	ISIS EM-BLASSO	SNP_IGA_88046	1	26896332	-0.4782	5.3615	6.1717	7.1496	0.2836
PW_2012	ISIS EM-BLASSO	SNP_IGA_131571	1	45022200	0.435	3.9726	4.7228	5.2919	0.1983
PW_2012	ISIS EM-BLASSO	SNP_IGA_545655	5	882334	0.3544	4.0408	4.7944	3.9753	0.2783
PW_2012	ISIS EM-BLASSO	SNP_IGA_681127	6	24170695	0.4073	3.6683	4.4028	1.8669	0.3401
PW_2012	ISIS EM-BLASSO	SNP_IGA_684085	6	25090090	0.6887	6.0412	6.8756	12.2571	0.1493
PW_2012	ISIS EM-BLASSO	SNP_IGA_687855	6	26042026	-0.4473	5.3994	6.211	5.0504	0.436
PW_2012	ISIS EM-BLASSO	SNP_IGA_786363	7	18955387	0.4524	4.7479	5.5336	5.6439	0.1695
PW_2012	ISIS EM-BLASSO	SNP_IGA_791930	7	21352526	-0.4167	5.2061	6.0104	5.3723	0.2452
SSC_2010	mrMLM	SNP_IGA_596393	5	13411012	1.0386	4.4124	5.1835	24.0014	0.4317
SSC_2010	FASTmrEMMA	SNP_IGA_603627	5	17197419	1.4973	3.4337	4.1552	6.8079	0.3191
SSC_2010	pLARmEB	SNP_IGA_785031	7	18329997	0.6359	3.0394	3.7372	8.7799	0.3865
SSC_2010	ISIS EM-BLASSO	SNP_IGA_410134	4	10626874	2.531e-05	3.1822	3.8889	1.4698e-08	0.305
SSC_2010	ISIS EM-BLASSO	SNP_IGA_603627	5	17197419	0.7598	3.8799	4.6254	13.2563	0.3191
SSC_2011	mrMLM	SNP_IGA_58626	1	17538855	2.2411	24.0913	25.2148	9.699	0.1448
SSC_2011	mrMLM	SNP_IGA_81682	1	24326549	-1.9105	12.9782	13.971	18.1799	0.0867
SSC_2011	mrMLM	SNP_IGA_366997	3	26642299	-1.443	6.7841	7.6422	11.1821	0.0835
SSC_2011	mrMLM	SNP_IGA_859365	8	12949044	-1.4693	6.1686	7.0073	14.0982	0.1099
SSC_2011	FASTmrMLM	SNP_IGA_58626	1	17538855	2.1628	25.0159	26.1474	9.3311	0.1484
SSC_2011	FASTmrMLM	SNP_IGA_81682	1	24326549	-1.9133	5.6754	6.4971	18.8345	0.0863
SSC_2011	FASTmrMLM	SNP_IGA_366997	3	26642299	-1.3437	3.5495	4.2775	10.0155	0.0842
SSC_2011	FASTmrMLM	SNP_IGA_595648	5	12978419	0.4995	3.2032	3.9112	2.1644	0.4432
SSC_2011	FASTmrMLM	SNP_IGA_859365	8	12949044	-1.282	6.4097	7.2562	11.0875	0.1095
SSC_2011	FASTmrEMMA	SNP_IGA_58626	1	17538855	4.2779	20.8803	21.9735	17.3539	0.1484
SSC_2011	FASTmrEMMA	SNP_IGA_81682	1	24326549	-3.1627	4.6177	5.3979	5.5866	0.0863
SSC_2011	FASTmrEMMA	SNP_IGA_84324	1	25482112	-1.418	3.0093	3.7052	1.9022	0.1853
SSC_2011	FASTmrEMMA	SNP_IGA_595786	5	13019899	0.9177	3.1501	3.8549	1.434	0.4105
SSC_2011	pLARmEB	SNP_IGA_58626	1	17538855	1.5647	12.5948	13.5813	1.5818	0.1484
SSC_2011	pLARmEB	SNP_IGA_353556	3	21637789	-0.7553	6.2736	7.1157	1.83	0.2516
SSC_2011	pLARmEB	SNP_IGA_411161	4	10922075	-0.5042	4.2062	4.9677	0.8019	0.36
SSC_2011	pLARmEB	SNP_IGA_595786	5	13019899	0.726	5.0269	5.8241	1.1269	0.4105
SSC_2011	pLARmEB	SNP_IGA_865518	8	14773988	-0.9896	3.9359	4.6843	2.2146	0.1179
SSC_2011	pLARmEB	SNP_IGA_875158	8	17898883	-0.6038	3.8491	4.5931	1.136	0.3958
SSC_2011	pKWmEB	SNP_IGA_84324	1	25482112	-1.0487	9.0412	9.9585	9.977	0.186
SSC_2011	pKWmEB	SNP_IGA_39104	1	13245758	-0.7442	3.9705	4.7206	11.8652	0.2981
SSC_2011	pKWmEB	SNP_IGA_551012	5	2085068	-1.342	7.7885	8.675	28.0428	0.1734
SSC_2011	pKWmEB	SNP_IGA_595786	5	13019899	0.3906	3.198	3.9056	5.592	0.408
SSC_2011	pKWmEB	SNP_IGA_865518	8	14773988	-0.9694	3.7048	4.4412	9.4035	0.1184
SSC_2011	pKWmEB	SNP_IGA_876353	8	18131723	-0.7891	4.5571	5.3346	7.426	0.1385
SSC_2011	ISIS EM-BLASSO	SNP_IGA_58626	1	17538855	1.8235	15.436	16.4653	7.142	0.1484
SSC_2011	ISIS EM-BLASSO	SNP_IGA_84324	1	25482112	-0.7375	3.9018	4.6484	5.1839	0.1853
SSC_2011	ISIS EM-BLASSO	SNP_IGA_238423	2	201667	-0.8799	4.1601	4.9195	3.6281	0.08
SSC_2011	ISIS EM-BLASSO	SNP_IGA_392288	4	5916267	-0.9864	4.3868	5.1567	9.2435	0.1747
SSC_2011	ISIS EM-BLASSO	SNP_IGA_551012	5	2085068	-1.081	4.4927	5.2674	11.412	0.1737
SSC_2011	ISIS EM-BLASSO	SNP_IGA_859365	8	12949044	-1.3897	8.185	9.0817	14.0276	0.1095
SSC_2012	mrMLM	SNP_IGA_397710	4	6694626	1.5338	11.7718	12.7441	15.8428	0.328
SSC_2012	mrMLM	SNP_IGA_426994	4	14898353	-1.4487	6.9377	7.8004	11.595	0.143
SSC_2012	mrMLM	SNP_IGA_411161	4	10922075	-1.0566	10.0667	11.0064	7.5188	0.3183
SSC_2012	mrMLM	SNP_IGA_552247	5	2240224	-1.4832	14.5347	15.5513	12.5198	0.4441
SSC_2012	mrMLM	SNP_IGA_595786	5	13019899	0.8835	6.3772	7.2227	3.8894	0.4806
SSC_2012	mrMLM	SNP_IGA_544961	5	698215	-1.1461	7.0448	7.9106	8.2322	0.2065
SSC_2012	mrMLM	SNP_IGA_673205	6	21277895	-1.4433	9.5041	10.4318	9.9354	0.1247
SSC_2012	mrMLM	SNP_IGA_879528	8	19234898	0.636	3.1897	3.8968	2.684	0.2441
SSC_2012	mrMLM	SNP_IGA_821894	8	5071328	-0.8285	3.0888	3.7897	2.9083	0.1129
SSC_2012	FASTmrMLM	SNP_IGA_397710	4	6694626	1.5241	13.5566	14.5585	16.3762	0.3266
SSC_2012	FASTmrMLM	SNP_IGA_411161	4	10922075	-0.9389	9.9364	10.8733	6.2148	0.3169
SSC_2012	FASTmrMLM	SNP_IGA_426994	4	14898353	-1.4277	7.5932	8.4744	11.789	0.1435
SSC_2012	FASTmrMLM	SNP_IGA_544961	5	698215	-1.1282	7.0677	7.9342	8.3507	0.2066
SSC_2012	FASTmrMLM	SNP_IGA_552247	5	2240224	-1.4448	13.7516	14.7565	12.4369	0.4443
SSC_2012	FASTmrMLM	SNP_IGA_595786	5	13019899	0.8161	6.2437	7.0848	3.474	0.4818
SSC_2012	FASTmrMLM	SNP_IGA_673205	6	21277895	-1.3994	8.4338	9.3367	9.7773	0.1242
SSC_2012	FASTmrMLM	SNP_IGA_879528	8	19234898	0.4518	3.1536	3.8585	1.4177	0.2441
SSC_2012	FASTmrEMMA	SNP_IGA_397710	4	6694626	3.3767	13.7972	14.8029	12.7032	0.3266
SSC_2012	FASTmrEMMA	SNP_IGA_409351	4	10387393	2.3909	5.1842	5.9876	7.8514	0.4818
SSC_2012	FASTmrEMMA	SNP_IGA_411601	4	10976364	-6.7343e-05	4.7487	5.5345	2.9854e-09	0.1874
SSC_2012	FASTmrEMMA	SNP_IGA_552247	5	2240224	-4.662	31.438	32.6182	24.0436	0.4443
SSC_2012	pLARmEB	SNP_IGA_151613	2	3389258	0.5252	6.4283	7.2754	0.6532	0.4347
SSC_2012	pLARmEB	SNP_IGA_394780	4	5464700	-0.5991	3.3035	4.0175	1.4015	0.3212
SSC_2012	pLARmEB	SNP_IGA_397710	4	6694626	1.7794	15.0358	16.0595	12.3363	0.3266
SSC_2012	pLARmEB	SNP_IGA_411161	4	10922075	-1.1017	13.3486	14.3473	4.7291	0.3169
SSC_2012	pLARmEB	SNP_IGA_426994	4	14898353	-0.8685	3.2189	3.9278	2.4108	0.1435
SSC_2012	pLARmEB	SNP_IGA_544961	5	698215	-0.9597	4.1808	4.9411	3.3394	0.2066
SSC_2012	pLARmEB	SNP_IGA_552247	5	2240224	-1.2626	13.7595	14.7646	5.2493	0.4443
SSC_2012	pLARmEB	SNP_IGA_595786	5	13019899	0.9316	7.366	8.241	2.5018	0.4818
SSC_2012	pLARmEB	SNP_IGA_618417	6	889073	-0.7082	4.184	4.9445	1.5958	0.166
SSC_2012	pLARmEB	SNP_IGA_673205	6	21277895	-1.2452	6.6571	7.5113	4.2784	0.1242
SSC_2012	pLARmEB	snp_6_21067422	6	22931779	0.7588	6.9362	7.7988	2.2435	0.2987
SSC_2012	pLARmEB	SNP_IGA_866041	8	15002010	-1.3652	8.3464	9.2472	5.0397	0.1296
SSC_2012	pLARmEB	SNP_IGA_867673	8	15650294	0.7192	5.5459	6.363	1.9881	0.3169
SSC_2012	pKWmEB	SNP_IGA_113678	1	38124403	-0.5504	5.5251	6.3414	2.0598	0.2527
SSC_2012	pKWmEB	SNP_IGA_426994	4	14898353	-1.1352	3.5491	4.2771	6.7899	0.143
SSC_2012	pKWmEB	SNP_IGA_405623	4	9640313	-0.6775	6.1743	7.0132	2.7717	0.4978
SSC_2012	pKWmEB	SNP_IGA_529014	4	24192764	0.5491	3.3889	4.1078	1.6894	0.3484
SSC_2012	pKWmEB	SNP_IGA_411161	4	10922075	-0.7412	7.0246	7.8898	5.3931	0.3183
SSC_2012	pKWmEB	SNP_IGA_552247	5	2240224	-1.4231	8.668	9.5766	13.6535	0.4441
SSC_2012	pKWmEB	SNP_IGA_552927	5	2353032	1.51	8.5793	9.4858	16.97	0.2118
SSC_2012	pKWmEB	SNP_IGA_598615	5	14100408	0.7123	5.2357	6.0411	5.1613	0.2785
SSC_2012	pKWmEB	snp_scaffold_5_274325	5	274327	-0.9321	6.819	7.6782	8.9223	0.2602
SSC_2012	pKWmEB	snp_8_5519501	8	5517846	-0.644	4.7452	5.5308	2.56	0.4538
SSC_2012	pKWmEB	SNP_IGA_879528	8	19234898	0.6447	4.4893	5.2638	4.6906	0.2441
SSC_2012	ISIS EM-BLASSO	SNP_IGA_398075	4	6849424	1.1165	8.3213	9.2214	9.3297	0.1906
SSC_2012	ISIS EM-BLASSO	SNP_IGA_411161	4	10922075	-0.8186	6.524	7.3741	5.6409	0.3169
SSC_2012	ISIS EM-BLASSO	SNP_IGA_426994	4	14898353	-1.2221	5.5178	6.3338	10.3134	0.1435
SSC_2012	ISIS EM-BLASSO	SNP_IGA_544961	5	698215	-0.992	5.7289	6.5525	7.7085	0.2066
SSC_2012	ISIS EM-BLASSO	SNP_IGA_552451	5	2270106	-1.0914	6.3717	7.217	9.844	0.2762
SSC_2012	ISIS EM-BLASSO	SNP_IGA_596063	5	13231815	-0.6401	4.4551	5.2281	3.3477	0.2238
SSC_2012	ISIS EM-BLASSO	SNP_IGA_673205	6	21277895	-1.4349	8.8534	9.7664	12.274	0.1242
SSC_2012	ISIS EM-BLASSO	snp_6_21067422	6	22931779	0.6229	4.1655	4.9251	3.2657	0.2987
SSC_2012	ISIS EM-BLASSO	SNP_IGA_786682	7	19091455	0.8152	3.2254	3.9347	3.3699	0.0964
TA_2011	mrMLM	SNP_IGA_544961	5	698215	0.3955	32.4992	33.6865	17.2863	0.1685
TA_2011	mrMLM	SNP_IGA_547830	5	1342919	0.5686	20.3879	21.476	38.6691	0.1957
TA_2011	mrMLM	SNP_IGA_547211	5	1190201	-0.5679	14.8751	15.8966	39.5963	0.2141
TA_2011	FASTmrMLM	SNP_IGA_125029	1	47074731	-0.0845	5.0461	5.8441	5.7243	0.1418
TA_2011	FASTmrMLM	SNP_IGA_546316	5	1049936	-0.0026	4.6499	5.4315	0.0061	0.1613
TA_2011	pLARmEB	SNP_IGA_111017	1	36771628	-0.0546	4.5426	5.3195	0.7232	0.434
TA_2011	pLARmEB	SNP_IGA_124160	1	47422241	-0.0727	7.9716	8.8629	1.35	0.1981
TA_2011	pLARmEB	SNP_IGA_531377	4	24670803	0.0002	3.131	3.8345	8.9331e-06	0.4318
TA_2011	pLARmEB	SNP_IGA_546316	5	1049936	-0.0895	3.274	3.9862	2.0667	0.1613
TA_2011	pLARmEB	SNP_IGA_602661	5	16655703	0.0596	4.9049	5.6972	1.0341	0.2121
TA_2011	ISIS EM-BLASSO	SNP_IGA_110845	1	36722447	-0.0388	3.8511	4.5952	0.2887	0.3387
TA_2011	ISIS EM-BLASSO	SNP_IGA_131571	1	45022200	-0.0835	6.524	7.3741	2.2424	0.1504
TA_2011	ISIS EM-BLASSO	SNP_IGA_544640	5	629642	0.4599	36.3593	37.5705	76.1106	0.1537
TA_2011	ISIS EM-BLASSO	SNP_IGA_546316	5	1049936	-0.1053	3.3824	4.101	4.0803	0.1613
TA_2011	ISIS EM-BLASSO	SNP_IGA_796567	8	933229	0.0644	3.8696	4.6146	1.6793	0.1829
TA_2012	mrMLM	SNP_IGA_273623	2	21757389	0.1073	3.2739	3.9861	5.7261	0.1346
TA_2012	mrMLM	SNP_IGA_544495	5	610569	0.3151	9.0965	10.0151	56.3331	0.1816
TA_2012	mrMLM	SNP_IGA_552927	5	2353032	0.1015	3.206	3.9141	6.0296	0.2144
TA_2012	FASTmrMLM	SNP_IGA_547830	5	1342919	2.7857e-05	3.1416	3.8458	8.146e-07	0.244
TA_2012	FASTmrMLM	SNP_IGA_552927	5	2353032	0.0882	4.3252	5.0923	7.7005	0.2135
TA_2012	FASTmrEMMA	SNP_IGA_552927	5	2353032	0.0001	4.991	5.7867	1.5806e-06	0.2135
TA_2012	pLARmEB	SNP_IGA_544495	5	610569	0.334	52.3696	53.6587	37.3111	0.1819
TA_2012	ISIS EM-BLASSO	SNP_IGA_106000	1	34830062	-0.0913	8.293	9.1924	4.1662	0.4847
TA_2012	ISIS EM-BLASSO	SNP_IGA_553456	5	2477309	0.08	4.2699	5.0344	4.997	0.219
TA_2012	ISIS EM-BLASSO	SNP_IGA_598137	5	13965842	0.072	6.9197	7.7819	4.3247	0.2865
pH_2010	pLARmEB	SNP_IGA_30043	1	11652991	-0.0558	3.0662	3.7657	0.7161	0.4255
pH_2010	pLARmEB	SNP_IGA_544428	5	557504	-0.5178	29.5084	30.6751	53.4014	0.1312
pH_2010	pLARmEB	SNP_IGA_862328	8	13949612	0.0655	4.6834	5.4664	1.1222	0.4149
pH_2011	mrMLM	SNP_IGA_288845	2	29376788	-0.1538	11.1944	12.1562	14.4	0.2791
pH_2011	mrMLM	SNP_IGA_544428	5	557504	-0.3589	7.0791	7.9459	55.8792	0.1323
pH_2011	FASTmrMLM	SNP_IGA_288845	2	29376788	-0.1407	11.1946	12.1564	14.5761	0.2776
pH_2011	FASTmrMLM	SNP_IGA_544428	5	557504	-0.2951	7.0793	7.9461	45.6929	0.1316
pH_2011	FASTmrEMMA	SNP_IGA_288845	2	29376788	-0.2933	7.2752	8.1476	10.3553	0.2776
pH_2011	pLARmEB	SNP_IGA_29904	1	11571929	-0.0733	3.0842	3.7848	1.6828	0.2303
pH_2011	pLARmEB	SNP_IGA_288845	2	29376788	-0.1455	11.606	12.5754	6.8534	0.2776
pH_2011	pLARmEB	SNP_IGA_544428	5	557504	-0.3636	8.6761	9.5849	30.4776	0.1316
pH_2011	pKWmEB	SNP_IGA_436566	4	15025597	-0.0777	3.9063	4.6532	2.7608	0.3201
pH_2011	pKWmEB	SNP_IGA_544428	5	557504	-0.2821	10.4017	11.3482	62.7312	0.1323
pH_2011	pKWmEB	SNP_IGA_690433	6	26851247	-0.0004	3.6302	4.3626	0.0427	0.1561
pH_2011	ISIS EM-BLASSO	SNP_IGA_288845	2	29376788	-0.1195	4.9077	5.7001	10.2765	0.2776
pH_2011	ISIS EM-BLASSO	SNP_IGA_347845	3	19790364	0.1775	4.7677	5.5543	8.4361	0.0513
pH_2011	ISIS EM-BLASSO	SNP_IGA_544428	5	557504	-0.2767	8.3054	9.2051	39.2948	0.1316
pH_2012	mrMLM	SNP_IGA_346745	3	19614789	-0.2095	6.839	7.6988	11.0459	0.1997
pH_2012	mrMLM	SNP_IGA_551012	5	2085068	-0.4671	21.2523	22.3492	57.1947	0.1949
pH_2012	pLARmEB	SNP_IGA_106146	1	34877986	0.1022	5.2256	6.0306	1.8269	0.4794
pH_2012	pLARmEB	SNP_IGA_287919	2	28921027	-0.0775	3.8892	4.6352	1.4726	0.3127
pH_2012	pLARmEB	SNP_IGA_346745	3	19614789	-0.1233	4.8345	5.6239	3.4588	0.1984
pH_2012	pLARmEB	SNP_IGA_364601	3	25457488	0.1441	3.5323	4.2594	3.527	0.1159
pH_2012	pLARmEB	SNP_IGA_413365	4	11654504	0.1848	3.5566	4.285	6.6304	0.1365
pH_2012	pLARmEB	SNP_IGA_516318	4	22817918	0.2353	5.9968	6.8297	8.5765	0.4032
pH_2012	pLARmEB	SNP_IGA_544495	5	610569	-0.5107	41.2956	42.534	52.112	0.1571
pH_2012	pKWmEB	SNP_IGA_297507	3	3636637	0.2077	5.6614	6.4826	19.1366	0.3834
pH_2012	pKWmEB	SNP_IGA_543247	5	276222	-0.0814	3.623	4.355	29.8183	0.361
pH_2012	pKWmEB	SNP_IGA_691236	6	27051683	0.1422	3.6346	4.3673	18.3404	0.1518
pH_2012	ISIS EM-BLASSO	SNP_IGA_413365	4	11654504	0.162	5.7024	6.5251	6.0145	0.1365
pH_2012	ISIS EM-BLASSO	SNP_IGA_544495	5	610569	-0.5141	42.1788	43.4217	62.3269	0.1571
pH_2012	ISIS EM-BLASSO	SNP_IGA_796755	8	1011172	-0.2204	5.8392	6.6667	6.8404	0.073

## Sheet: S6_Table
Table S6. Significant QTNs detected using FarmCPU
Trait	SNP	Scaffold	Position	P.value
BD_2011	SNP_IGA_131746	1	45008832	2.51443e-20
BD_2011	SNP_IGA_592741	5	11454751	7.93285e-15
BD_2011	SNP_IGA_126857	1	46125525	2.918e-10
BD_2011	SNP_IGA_2791	1	917314	5.11501e-09
BD_2011	SNP_IGA_370194	4	607467	1.36732e-07
BD_2011	SNP_IGA_173418	2	4986802	6.11194e-07
BD_2011	SNP_IGA_829787	8	6208042	8.35635e-07
BD_2011	SNP_IGA_829808	8	6208378	8.35635e-07
BD_2011	SNP_IGA_131557	1	45022954	8.59029e-07
BD_2011	SNP_IGA_826441	8	5727158	1.31596e-06
BD_2011	SNP_IGA_828960	8	6146912	1.31596e-06
BD_2011	SNP_IGA_829800	8	6208223	1.31596e-06
BD_2011	SNP_IGA_901609	8	7647992	1.31596e-06
BD_2011	SNP_IGA_840849	8	9594348	1.31596e-06
BD_2011	SNP_IGA_840843	8	9596184	1.31596e-06
BD_2011	SNP_IGA_834505	8	10782584	1.31596e-06
BD_2011	SNP_IGA_834501	8	10782720	1.31596e-06
BD_2011	SNP_IGA_828932	8	6145314	1.31596e-06
BD_2011	SNP_IGA_828943	8	6146115	1.31596e-06
BD_2011	SNP_IGA_829884	8	6210043	1.31596e-06
BD_2011	SNP_IGA_840364	8	9631181	1.31596e-06
BD_2011	SNP_IGA_834321	8	10824574	1.31596e-06
BD_2011	SNP_IGA_78954	1	23305178	1.33911e-06
BD_2011	SNP_IGA_830082	8	6262185	2.23413e-06
BD_2012	SNP_IGA_420316	4	13813285	7.35093e-13
BD_2012	SNP_IGA_796755	8	1011172	1.53505e-11
BD_2012	SNP_IGA_570521	5	5305995	1.8219e-11
BD_2012	SNP_IGA_427175	4	14956853	1.56784e-10
BD_2012	SNP_IGA_128189	1	45753343	1.88912e-08
BD_2012	SNP_IGA_655501	6	14588253	6.07221e-07
BD_2012	SNP_IGA_370194	4	607467	7.73509e-07
BD_2012	SNP_IGA_796567	8	933229	2.1954e-06
BD_2012	SNP_IGA_676161	6	22411000	2.20529e-06
RD_2010	SNP_IGA_410794	4	10890653	2.57827e-16
RD_2010	SNP_IGA_871755	8	16887966	2.57777e-09
RD_2010	snp_6_2750075	6	2458637	4.39016e-07
RD_2010	SNP_IGA_395202	4	6168557	7.11679e-07
RD_2010	SNP_IGA_415301	4	12523245	1.28097e-06
RD_2010	SNP_IGA_5891	1	1956920	1.5747e-06
RD_2010	SNP_IGA_829787	8	6208042	1.68621e-06
RD_2011	SNP_IGA_410794	4	10890653	3.89844e-39
RD_2011	SNP_IGA_803461	8	2534033	3.23936e-13
RD_2011	SNP_IGA_409351	4	10387393	2.44306e-10
RD_2011	SNP_IGA_415382	4	12546297	1.20364e-07
RD_2011	SNP_IGA_870525	8	16506121	2.143e-07
RD_2011	SNP_IGA_359875	3	23531813	2.21755e-06
RD_2012	SNP_IGA_410794	4	10890653	1.46508e-55
RD_2012	SNP_IGA_415382	4	12546297	7.72179e-11
RD_2012	SNP_IGA_417840	4	13123061	7.44141e-10
RD_2012	SNP_IGA_410398	4	10696489	1.10465e-09
RD_2012	SNP_IGA_410265	4	10649614	5.59928e-09
RD_2012	SNP_IGA_410165	4	10641209	5.59928e-09
RD_2012	SNP_IGA_632033	6	8774913	8.57297e-09
RD_2012	SNP_IGA_410134	4	10626874	2.10764e-08
RD_2012	SNP_IGA_417666	4	13091850	2.96709e-08
RD_2012	SNP_IGA_99110	1	30864365	3.47026e-08
RD_2012	SNP_IGA_516824	4	22849976	9.14682e-08
RD_2012	SNP_IGA_467302	4	19028425	1.03372e-07
RD_2012	SNP_IGA_652595	6	13535642	1.06291e-07
RD_2012	SNP_IGA_566322	5	4932817	1.13362e-06
RD_2012	SNP_IGA_803461	8	2534033	1.58566e-06
RD_2012	SNP_IGA_400260	4	7244980	1.98379e-06
RD_2012	SNP_IGA_408981	4	10280095	2.16489e-06
DAF_2011	SNP_IGA_411637	4	10981971	4.56118e-20
DAF_2011	SNP_IGA_863130	8	14145609	2.10721e-06
DAF_2012	SNP_IGA_411340	4	10934831	2.13594e-32
DAF_2012	SNP_IGA_402256	4	8371579	1.52345e-09
DAF_2012	SNP_IGA_609463	6	3544626	5.17427e-08
DAF_2012	SNP_IGA_99110	1	30864365	3.14552e-07
DAF_2012	SNP_IGA_149957	2	3213504	3.93162e-07
DAF_2012	SNP_IGA_293290	3	1827175	2.14569e-06
Blush_2010	SNP_IGA_341962	3	18179421	1.30448e-14
Blush_2010	SNP_IGA_223473	2	9814447	5.72235e-08
Blush_2010	SNP_IGA_245214	2	14148007	3.08623e-07
Blush_2010	SNP_IGA_245232	2	14149633	3.08623e-07
Blush_2010	SNP_IGA_455724	2	12233051	3.08623e-07
Blush_2010	SNP_IGA_455330	2	12300852	3.08623e-07
Blush_2010	SNP_IGA_905196	2	13180940	3.08623e-07
Blush_2010	SNP_IGA_244140	2	13949324	3.08623e-07
Blush_2010	SNP_IGA_248434	2	14819294	3.08623e-07
Blush_2011	snp_3_12878608	3	18221847	5.91656e-17
Blush_2011	SNP_IGA_602331	5	16550893	7.43196e-08
Blush_2011	SNP_IGA_131644	1	45019530	1.30846e-07
Blush_2011	SNP_IGA_581626	5	7728715	1.40587e-07
Blush_2011	SNP_IGA_572841	5	5865360	4.75115e-07
Blush_2011	SNP_IGA_330725	3	16198112	1.1017e-06
FDIA_2011	SNP_IGA_104819	1	34325189	5.71795e-09
FDIA_2011	SNP_IGA_595424	5	12884759	4.97119e-07
FDIA_2012	snp_6_21067422	6	22931779	1.63459e-06
FW_2010	SNP_IGA_779276	7	15743931	5.59292e-09
FW_2011	SNP_IGA_652492	6	13508541	1.53045e-08
FW_2011	SNP_IGA_662881	6	17880635	1.61791e-08
FW_2011	SNP_IGA_298139	3	3892167	2.78015e-08
FW_2011	SNP_IGA_96555	1	29651327	7.3536e-08
FW_2012	SNP_IGA_780816	7	16365104	9.4121e-10
FW_2012	SNP_IGA_714207	7	2810367	1.94805e-07
FW_2012	SNP_IGA_359875	3	23531813	9.24958e-07
FW_2012	SNP_IGA_427595	4	14993391	1.58944e-06
FF_2010	SNP_IGA_453202	4	18696436	3.93618e-07
FF_2011	SNP_IGA_379393	4	1391180	4.71825e-08
FF_2011	SNP_IGA_358339	3	22856957	1.32784e-06
FF_2011	SNP_IGA_877000	8	18311992	2.28549e-06
FF_2012	SNP_IGA_411161	4	10922075	3.41903e-10
FF_2012	SNP_IGA_405628	4	9640863	6.36425e-10
FF_2012	SNP_IGA_397228	4	6541340	1.74676e-06
ADH_2010	SNP_IGA_450629	4	18235458	1.65977e-18
ADH_2010	SNP_IGA_411188	4	10923251	5.25765e-08
ADH_2010	SNP_IGA_359035	3	23125167	9.83794e-07
ADH_2010	SNP_IGA_409167	4	10365342	1.00755e-06
ADH_2010	SNP_IGA_409379	4	10389254	1.00755e-06
ADH_2010	SNP_IGA_409453	4	10396616	1.00755e-06
ADH_2010	SNP_IGA_408933	4	10272257	1.00755e-06
ADH_2010	SNP_IGA_409449	4	10395507	1.00755e-06
ADH_2010	SNP_IGA_408505	4	10184168	1.58401e-06
ADH_2010	SNP_IGA_408884	4	10263054	1.76889e-06
ADH_2011	SNP_IGA_410398	4	10696489	8.02853e-19
ADH_2011	SNP_IGA_441749	4	16584598	3.93538e-18
ADH_2011	SNP_IGA_467302	4	19028425	8.30549e-14
ADH_2011	SNP_IGA_478039	4	19905780	4.07728e-12
ADH_2011	SNP_IGA_446745	4	17587156	5.03138e-11
ADH_2011	SNP_IGA_398634	4	6969104	1.24179e-09
ADH_2011	SNP_IGA_409379	4	10389254	9.64859e-09
ADH_2011	SNP_IGA_366997	3	26642299	3.15986e-07
ADH_2012	SNP_IGA_467302	4	19028425	4.80203e-10
ADH_2012	SNP_IGA_410398	4	10696489	5.48959e-09
ADH_2012	SNP_IGA_651766	6	13289450	5.5011e-07
RP_2010	SNP_IGA_341962	3	18179421	6.63923e-11
RP_2010	SNP_IGA_381612	4	2438391	2.70748e-07
RP_2010	SNP_IGA_557636	5	3522141	3.89583e-07
RP_2010	SNP_IGA_103712	1	33707632	1.27499e-06
RP_2011	SNP_IGA_341962	3	18179421	2.93128e-16
RP_2011	SNP_IGA_698951	6	29242212	4.72894e-08
RP_2011	SNP_IGA_484200	4	20270725	3.16151e-07
RP_2012	SNP_IGA_412662	4	11298736	3.57681e-07
RP_2012	SNP_IGA_804739	8	2702428	7.35442e-07
RP_2012	SNP_IGA_411147	4	10921604	1.42691e-06
FT_2010	SNP_IGA_477951	4	19895639	1.31315e-31
FT_2010	SNP_IGA_258340	2	17040217	6.43196e-15
FT_2010	SNP_IGA_543474	5	329318	1.26775e-12
FT_2010	SNP_IGA_531810	4	24879284	3.03479e-10
FT_2010	SNP_IGA_409544	4	10416496	1.05904e-07
FT_2010	SNP_IGA_355498	3	22144613	3.19562e-07
FT_2010	SNP_IGA_686609	6	25770973	5.46704e-07
FT_2010	Pp12Cl	3	10879473	9.71687e-07
FT_2011	SNP_IGA_545448	5	850261	2.49509e-14
FT_2011	SNP_IGA_556422	5	3272346	3.46957e-08
FT_2011	SNP_IGA_873803	8	17491608	1.44748e-07
FT_2012	SNP_IGA_188736	2	6043326	8.86122e-07
PW_2010	SNP_IGA_609984	6	3294947	1.0397e-11
PW_2010	SNP_IGA_437516	4	15182577	2.86234e-08
PW_2010	SNP_IGA_679038	6	23447467	2.95123e-08
PW_2011	snp_scaffold_8_18584856	8	19329311	1.49568e-07
PW_2012	SNP_IGA_686667	6	25788685	4.51778e-08
PW_2012	SNP_IGA_687642	6	26020750	4.90954e-07
PW_2012	SNP_IGA_378809	4	1345140	5.53683e-07
PW_2012	SNP_IGA_545655	5	882334	1.34937e-06
SSC_2011	SNP_IGA_58626	1	17538855	3.31474e-17
SSC_2011	SNP_IGA_595786	5	13019899	2.86608e-08
SSC_2011	SNP_IGA_859154	8	12880042	3.01066e-07
SSC_2011	SNP_IGA_410265	4	10649614	1.23363e-06
SSC_2011	SNP_IGA_673205	6	21277895	1.72544e-06
SSC_2012	SNP_IGA_552247	5	2240224	1.96785e-14
SSC_2012	SNP_IGA_411161	4	10922075	5.13987e-09
SSC_2012	SNP_IGA_397710	4	6694626	1.96043e-08
SSC_2012	SNP_IGA_426994	4	14898353	5.03652e-08
SSC_2012	SNP_IGA_409351	4	10387393	1.09557e-07
SSC_2012	SNP_IGA_867673	8	15650294	1.39816e-07
SSC_2012	SNP_IGA_873803	8	17491608	2.40581e-07
SSC_2012	SNP_IGA_595786	5	13019899	1.8887e-06
SSC_2012	SNP_IGA_866501	8	15151404	2.07779e-06
SSC_2012	SNP_IGA_673205	6	21277895	2.4192e-06
TA_2011	SNP_IGA_544640	5	629642	4.74568e-69
TA_2011	SNP_IGA_209271	2	7905751	8.45415e-07
TA_2012	SNP_IGA_544657	5	635222	9.54165e-45
pH_2010	SNP_IGA_544495	5	610569	1.27503e-28
pH_2010	SNP_IGA_862328	8	13949612	1.15171e-08
pH_2011	SNP_IGA_544428	5	557504	8.8684e-38
pH_2011	SNP_IGA_288845	2	29376788	2.31441e-10
pH_2011	SNP_IGA_436566	4	15025597	5.76668e-07
pH_2012	SNP_IGA_544657	5	635222	1.84153e-37

## Sheet: S7_Table
Table S7. Functional annotation of candidate genes detected in the genomic regions encompassing the QTNs detected using the mrMLM 4.0 methods and FarmCPU. BD - bloom date; RD - ripening date; DAB - days after bloom; FDIA - fruit diameter; FW - Fruit weight; FF - fruit firmness; ADH – adherence; RP - redness around pit; FT - fruit texture; SSC - solid soluble concentration.
Hap	Trait	Name	Chr	Start	End	GO	GO accession	InterPro
1_1	SSC	Prupe.1G189200	1	17437835	17439052			DDE_Tnp_4
1_1	SSC	Prupe.1G189500	1	17507809	17513850			F21B23.6 PROTEIN-RELATED
1_1	SSC	Prupe.1G189100	1	17420994	17422301	nuclear mRNA splicing, via spliceosome; spliceosomal complex; spliceosomal snRNP assembly	GO:0000387; GO:0000398; GO:0005681	GEMIN2
1_1	SSC	Prupe.1G189700	1	17514724	17515306	nucleic acid binding	GO:0003676	Ribonuclease H-like
1_1	SSC	Prupe.1G189300	1	17447905	17455673	protein binding	GO:0005515	Thioredoxin-like
1_2	RD	Prupe.1G326400	1	31067083	31067928	cytoplasm; protein folding	GO:0005737; GO:0006457	10 KDA HEAT SHOCK PROTEIN
1_2	RD	Prupe.1G319300	1	30654041	30657621	iron ion binding; L-ascorbic acid binding; oxidation-reduction process; oxidoreductase activity; oxidoreductase activity, acting on paired donors, with incorporation or reduction of molecular oxygen; oxidoreductase activity, acting on paired donors, with incorporation or reduction of molecular oxygen, 2-oxoglutarate as one donor, and incorporation of one atom each of oxygen into both donors	GO:0005506; GO:0016491; GO:0016705; GO:0016706; GO:0031418; GO:0055114	2OG-FeII_Oxy
1_2	RD	Prupe.1G324200	1	30948486	30949995			6-blade_b-propeller_TolB-like
1_2	RD	Prupe.1G325200	1	31014129	31015478	proteolysis; serine-type carboxypeptidase activity	GO:0004185; GO:0006508	AB_hydrolase
1_2	RD	Prupe.1G322600	1	30837030	30840473	ATPase activity; ATP binding; membrane	GO:0005524; GO:0016020; GO:0016887	ABC_TRANSPORTER_1
1_2	RD	Prupe.1G319800	1	30694962	30697477	fatty acid biosynthetic process; thiolester hydrolase activity	GO:0006633; GO:0016790	Acyl-ACP_TE
1_2	RD	Prupe.1G325900	1	31037374	31039933	hydrolase activity	GO:0016787	ADP-SUGAR PYROPHOSPHATASE
1_2	RD	Prupe.1G319500	1	30670971	30673980	catalytic activity; fructose-bisphosphate aldolase activity; glycolysis	GO:0003824; GO:0004332; GO:0006096	Aldolase
1_2	RD	Prupe.1G323900	1	30925363	30929886	catalytic activity; NAD biosynthetic process; nicotinate-nucleotide diphosphorylase (carboxylating) activity; pyridine nucleotide biosynthetic process; transferase activity, transferring pentosyl groups	GO:0003824; GO:0004514; GO:0009435; GO:0016763; GO:0019363	Aldolase_TIM
1_2	RD	Prupe.1G321000	1	30771899	30778395	protein binding	GO:0005515	ALIX_LYPXL_bnd
1_2	RD	Prupe.1G320600	1	30752341	30754487	chromatin assembly or disassembly; nucleus	GO:0005634; GO:0006333	ANTI-SILENCING PROTEIN 1
1_2	RD	Prupe.1G324800	1	30977850	30979504	membrane; transport; transporter activity	GO:0005215; GO:0006810; GO:0016020	Aquaporin-like
1_2	RD	Prupe.1G325800	1	31034190	31036971	DNA binding; nucleosome; nucleosome assembly; nucleus	GO:0000786; GO:0003677; GO:0005634; GO:0006334	ATHOOK
1_2	RD	Prupe.1G320700	1	30761940	30765830	ATPase activity; ATP binding; ATP biosynthetic process; ATP catabolic process; ATP hydrolysis coupled proton transport; ATP metabolic process; ATP synthesis coupled proton transport; hydrogen ion transporting ATP synthase activity, rotational mechanism; hydrolase activity, acting on acid anhydrides, catalyzing transmembrane movement of substances; mitochondrial proton-transporting ATP synthase co…	GO:0000275; GO:0005524; GO:0006200; GO:0006754; GO:0015986; GO:0015991; GO:0015992; GO:0016820; GO:0016887; GO:0033178; GO:0046034; GO:0046933	ATPASE_ALPHA_BETA
1_2	RD	Prupe.1G325100	1	31002082	31012915	ATP binding; ATP-dependent DNA helicase activity; DNA recombination; DNA repair; nucleic acid binding	GO:0003676; GO:0004003; GO:0005524; GO:0006281; GO:0006310	ATP-dep_DNA_helicase_RecG
1_2	RD	Prupe.1G319600	1	30675371	30683821	ATP binding; helicase activity; nucleic acid binding	GO:0003676; GO:0004386; GO:0005524	ATP-DEPENDENT RNA HELICASE
1_2	RD	Prupe.1G321200	1	30779961	30781904	methyltransferase activity	GO:0008168	ATPP-LIKE PROTEIN-RELATED
1_2	RD	Prupe.1G321300	1	30785279	30787135	methyltransferase activity	GO:0008168	ATPP-LIKE PROTEIN-RELATED
1_2	RD	Prupe.1G324900	1	30984950	30989515	integral to membrane; transmembrane transport	GO:0016021; GO:0055085	Auxin_eff
1_2	RD	Prupe.1G322300	1	30825157	30827499	integral to membrane; transmembrane transport	GO:0016021; GO:0055085	Auxin_eff
1_2	RD	Prupe.1G327300	1	31101426	31102262	defense response; response to biotic stimulus	GO:0006952; GO:0009607	Bet_v_1
1_2	RD	Prupe.1G327400	1	31106248	31107078	defense response; response to biotic stimulus	GO:0006952; GO:0009607	Bet_v_1
1_2	RD	Prupe.1G327500	1	31122462	31123309	defense response; response to biotic stimulus	GO:0006952; GO:0009607	Bet_v_1
1_2	RD	Prupe.1G327600	1	31126656	31127642	defense response; response to biotic stimulus	GO:0006952; GO:0009607	Bet_v_1
1_2	RD	Prupe.1G327700	1	31155671	31157327	defense response; response to biotic stimulus	GO:0006952; GO:0009607	Bet_v_1
1_2	RD	Prupe.1G320100	1	30706024	30708334	regulation of cell cycle	GO:0051726	CCNDBP1
1_2	RD	Prupe.1G324300	1	30950146	30952302			Chaperone J-domain
1_2	RD	Prupe.1G326800	1	31079419	31082472			Clavaminate synthase-like
1_2	RD	Prupe.1G323000	1	30855754	30857600	metal ion binding; metal ion transport	GO:0030001; GO:0046872	COPPER TRANSPORT PROTEIN ATOX1-RELATED
1_2	RD	Prupe.1G323100	1	30862718	30865133	metal ion binding; metal ion transport	GO:0030001; GO:0046872	COPPER-BINDING FAMILY PROTEIN-RELATED
1_2	RD	Prupe.1G323200	1	30869142	30873318	copper ion binding; oxidation-reduction process; oxidoreductase activity	GO:0005507; GO:0016491; GO:0055114	Cu-oxidase
1_2	RD	Prupe.1G326000	1	31043598	31052117	ATP binding; kinase activity; metabolic process	GO:0005524; GO:0008152; GO:0016301	CYTH-like_domain
1_2	RD	Prupe.1G321100	1	30778532	30779945	heme binding; iron ion binding; oxidation-reduction process; oxidoreductase activity, acting on paired donors, with incorporation or reduction of molecular oxygen	GO:0005506; GO:0016705; GO:0020037; GO:0055114	Cytochrome P450
1_2	RD	Prupe.1G322200	1	30819326	30823372	pentose-phosphate shunt, non-oxidative branch; ribose-5-phosphate isomerase activity	GO:0004751; GO:0009052	D-ribose-5-phosphate isomerase (RpiA), lid domain
1_2	RD	Prupe.1G327100	1	31092409	31095627	protein binding	GO:0005515	DYW_deaminase
1_2	RD	Prupe.1G322700	1	30840722	30843593	ELL-EAF complex; regulation of transcription, DNA-dependent	GO:0006355; GO:0032783	EAF
1_2	RD	Prupe.1G327200	1	31095690	31099132	integral to membrane; membrane	GO:0016020; GO:0016021	EamA
1_2	RD	Prupe.1G321800	1	30800744	30805056	cell redox homeostasis; oxidation-reduction process; thiol oxidase activity	GO:0016972; GO:0045454; GO:0055114	ERV_ALR
1_2	RD	Prupe.1G320800	1	30766317	30768710	oxidation-reduction process; oxidoreductase activity	GO:0016491; GO:0055114	F9L1.8 PROTEIN
1_2	RD	Prupe.1G322000	1	30809928	30811578			FAS1
1_2	RD	Prupe.1G326600	1	31071003	31077215			FucosylTrfase_pln
1_2	RD	Prupe.1G321500	1	30792335	30794243	hydrolase activity, acting on ester bonds; lipase activity; lipid metabolic process	GO:0006629; GO:0016298; GO:0016788	GDSL ESTERASE/LIPASE 6-RELATED
1_2	RD	Prupe.1G322800	1	30844303	30848332	acetylglucosaminyltransferase activity; membrane	GO:0008375; GO:0016020	GLYCOSYLTRANSFERASE 14 FAMILY MEMBER
1_2	RD	Prupe.1G325000	1	30996000	30998916	DNA binding; nucleus; regulation of transcription, DNA-dependent; sequence-specific DNA binding; sequence-specific DNA binding transcription factor activity	GO:0003677; GO:0003700; GO:0005634; GO:0006355; GO:0043565	HALZ
1_2	RD	Prupe.1G323400	1	30884180	30886207	chromatin binding; DNA binding	GO:0003677; GO:0003682	Homeodomain-like
1_2	RD	Prupe.1G325700	1	31029145	31033955	ATP binding; MAP kinase activity; protein kinase activity; protein phosphorylation; transferase activity, transferring phosphorus-containing groups	GO:0004672; GO:0004707; GO:0005524; GO:0006468; GO:0016772	Kinase-like_dom
1_2	RD	Prupe.1G321700	1	30796793	30800064	negative regulation of transcription from RNA polymerase III promoter	GO:0016480	Maf1
1_2	RD	Prupe.1G320200	1	30711393	30714596	antiporter activity; drug transmembrane transport; drug transmembrane transporter activity; membrane; transmembrane transport	GO:0006855; GO:0015238; GO:0015297; GO:0016020; GO:0055085	MatE
1_2	RD	Prupe.1G320300	1	30742597	30743682	antiporter activity; drug transmembrane transport; drug transmembrane transporter activity; membrane; transmembrane transport	GO:0006855; GO:0015238; GO:0015297; GO:0016020; GO:0055085	MatE
1_2	RD	Prupe.1G320400	1	30744180	30749160	antiporter activity; drug transmembrane transport; drug transmembrane transporter activity; membrane; transmembrane transport	GO:0006855; GO:0015238; GO:0015297; GO:0016020; GO:0055085	MatE
1_2	RD	Prupe.1G320500	1	30749521	30752340	antiporter activity; drug transmembrane transport; drug transmembrane transporter activity; membrane; transmembrane transport	GO:0006855; GO:0015238; GO:0015297; GO:0016020; GO:0055085	MatE
1_2	RD	Prupe.1G321900	1	30805453	30807789	zinc ion binding	GO:0008270	MEMBRANE ASSOCIATED RING FINGER
1_2	RD	Prupe.1G319900	1	30697499	30704012	DNA binding; DNA replication; nucleus; origin recognition complex	GO:0000808; GO:0003677; GO:0005634; GO:0006260	ORC4
1_2	RD	Prupe.1G322900	1	30848503	30852884	protein binding	GO:0005515	Pentatricopeptide_repeat
1_2	RD	Prupe.1G319700	1	30688016	30694742	phosphatidylserine biosynthetic process	GO:0006659	PHOSPHATIDYLSERINE SYNTHASE
1_2	RD	Prupe.1G322100	1	30811665	30816124			PROKAR_LIPOPROTEIN
1_2	RD	Prupe.1G324000	1	30932371	30933339			PROKAR_LIPOPROTEIN
1_2	RD	Prupe.1G326100	1	31053431	31057119	protein binding	GO:0005515	Quinonprotein_ADH-like_supfam
1_2	RD	Prupe.1G319200	1	30645763	30647556	protein binding; zinc ion binding	GO:0005515; GO:0008270	RING
1_2	RD	Prupe.1G326200	1	31056127	31062978	integral to membrane; membrane; secondary active sulfate transmembrane transporter activity; sulfate transmembrane transporter activity; sulfate transport; transmembrane transport	GO:0008271; GO:0008272; GO:0015116; GO:0016020; GO:0016021; GO:0055085	S04_transporter_CS
1_2	RD	Prupe.1G319400	1	30659385	30666271	SAGA complex; transcription cofactor activity	GO:0000124; GO:0003712	SAGA complex
1_2	RD	Prupe.1G320000	1	30703576	30706023	integral to membrane	GO:0016021	SEC-INDEPENDENT PROTEIN TRANSLOCASE PROTEIN TATC
1_2	RD	Prupe.1G321400	1	30787487	30791420	protein binding	GO:0005515	TETRATRICOPEPTIDE REPEAT PROTEIN 5
1_2	RD	Prupe.1G324700	1	30967670	30972171			TPX2
1_3	FDIA	Prupe.1G378600	1	34216786	34218342	catalytic activity; fatty acid biosynthetic process; lipid biosynthetic process; membrane; metabolic process; transferase activity, transferring acyl groups other than amino-acyl groups	GO:0003824; GO:0006633; GO:0008152; GO:0008610; GO:0016020; GO:0016747	3-ktacl-CoA_syn
1_3	FDIA	Prupe.1G379000	1	34234867	34240242			5_nucleotid
1_3	FDIA	Prupe.1G378300	1	34188800	34190758	catalytic activity; metabolic process	GO:0003824; GO:0008152	Acetyl-CoA synthetase-like
1_3	FDIA	Prupe.1G382400	1	34394991	34399651	metabolic process; transferase activity, transferring acyl groups	GO:0008152; GO:0016746	ACETYLTRANSFERASE-RELATED
1_3	FDIA	Prupe.1G379500	1	34266665	34270818	catalytic activity; FMN binding; iron ion binding; iron-sulfur cluster binding; oxidation-reduction process; oxidoreductase activity	GO:0003824; GO:0005506; GO:0010181; GO:0016491; GO:0051536; GO:0055114	Aldolase_TIM
1_3	FDIA	Prupe.1G380500	1	34312897	34319473	gluconeogenesis; glucose-6-phosphate isomerase activity; glycolysis	GO:0004347; GO:0006094; GO:0006096	Amino sugar and nucleotide sugar metabolism
1_3	FDIA	Prupe.1G379300	1	34257079	34260986			ANCIENT CONSERVED DOMAIN PROTEIN-RELATED
1_3	FDIA	Prupe.1G376700	1	34132845	34135780	endopeptidase activity; proteasome core complex; proteasome core complex, alpha-subunit complex; proteolysis involved in cellular protein catabolic process; threonine-type endopeptidase activity; ubiquitin-dependent protein catabolic process	GO:0004175; GO:0004298; GO:0005839; GO:0006511; GO:0019773; GO:0051603	Apoptosis
1_3	FDIA	Prupe.1G377000	1	34145489	34147738	integral to membrane	GO:0016021	AtER_Rer1p
1_3	FDIA	Prupe.1G382200	1	34386252	34390979			AUXILIN/CYCLIN G-ASSOCIATED KINASE-RELATED
1_3	FDIA	Prupe.1G378400	1	34191427	34196287	base-excision repair; catalytic activity; DNA repair	GO:0003824; GO:0006281; GO:0006284	base-excision repair
1_3	FDIA	Prupe.1G381800	1	34371544	34375526	metal ion binding; nucleic acid binding	GO:0003676; GO:0046872	C2H2 AND C2HC ZINC FINGER-CONTAINING PROTEIN-RELATED
1_3	FDIA	Prupe.1G377900	1	34174727	34176364			CBS
1_3	FDIA	Prupe.1G379200	1	34250715	34253603	methylation; methyltransferase activity	GO:0008168; GO:0032259	CHP00027_methylltransferase
1_3	FDIA	Prupe.1G379800	1	34282138	34285460			CRAL_TRIO
1_3	FDIA	Prupe.1G381900	1	34375803	34378453	heme binding; iron ion binding; oxidation-reduction process; oxidoreductase activity, acting on paired donors, with incorporation or reduction of molecular oxygen	GO:0005506; GO:0016705; GO:0020037; GO:0055114	Cytochrome P450
1_3	FDIA	Prupe.1G380600	1	34319190	34320832	dUTP diphosphatase activity; dUTP metabolic process; hydrolase activity	GO:0004170; GO:0016787; GO:0046080	DEOXYURIDINE 5'-TRIPHOSPHATE NUCLEOTIDOHYDROLASE
1_3	FDIA	Prupe.1G378000	1	34178731	34181182	chromatin binding; DNA binding	GO:0003677; GO:0003682	DUPLICATED SANT DNA-BINDING DOMAIN-CONTAINING PROTEIN-RELATED
1_3	FDIA	Prupe.1G378800	1	34223995	34225119	chromatin binding; DNA binding	GO:0003677; GO:0003682	DUPLICATED SANT DNA-BINDING DOMAIN-CONTAINING PROTEIN-RELATED
1_3	FDIA	Prupe.1G376900	1	34141112	34145378			DYNACTIN SUBUNIT P25
1_3	FDIA	Prupe.1G377700	1	34168773	34172431	protein binding	GO:0005515	F-box
1_3	FDIA	Prupe.1G380300	1	34305977	34308677	carbohydrate metabolic process; hydrolase activity, hydrolyzing O-glycosyl compounds	GO:0004553; GO:0005975	GLUCAN ENDO-1,3-BETA-GLUCOSIDASE 7-RELATED
1_3	FDIA	Prupe.1G380700	1	34322287	34330753	protein binding	GO:0005515	GRB10 INTERACTING GYF PROTEIN
1_3	FDIA	Prupe.1G378200	1	34184968	34186786	DNA binding	GO:0003677	HOMEOBOX_2
1_3	FDIA	Prupe.1G377300	1	34153041	34154895			ISOFLAVONE REDUCTASE HOMOLOG P3-RELATED
1_3	FDIA	Prupe.1G378700	1	34219739	34223190	cytoplasm	GO:0005737	ITPase-like
1_3	FDIA	Prupe.1G378900	1	34230311	34234907	ATP binding; protein binding; protein kinase activity; protein phosphorylation; transferase activity, transferring phosphorus-containing groups	GO:0004672; GO:0005515; GO:0005524; GO:0006468; GO:0016772	L domain-like
1_3	FDIA	Prupe.1G379400	1	34261508	34266470	methyltransferase activity	GO:0008168	Methyltransf_29
1_3	FDIA	Prupe.1G378500	1	34198159	34202989	integral to membrane; membrane; substrate-specific transmembrane transporter activity; transmembrane transport; transmembrane transporter activity; transporter activity	GO:0005215; GO:0016020; GO:0016021; GO:0022857; GO:0022891; GO:0055085	MFS
1_3	FDIA	Prupe.1G382100	1	34383389	34385937			Nucl-diP-sugar_transferase
1_3	FDIA	Prupe.1G376800	1	34136226	34139479			Nucleotide metabolism
1_3	FDIA	Prupe.1G381100	1	34339893	34340903			Ovate
1_3	FDIA	Prupe.1G377100	1	34148414	34150202	cell wall; cell wall modification; pectinesterase activity	GO:0005618; GO:0030599; GO:0042545	Pectinesterase
1_3	FDIA	Prupe.1G377500	1	34157168	34158634	cell wall; cell wall modification; pectinesterase activity	GO:0005618; GO:0030599; GO:0042545	Pectinesterase
1_3	FDIA	Prupe.1G377600	1	34159207	34160954	cell wall; cell wall modification; pectinesterase activity	GO:0005618; GO:0030599; GO:0042545	Pectinesterase
1_3	FDIA	Prupe.1G378100	1	34183199	34183924	oxidoreductase activity	GO:0016491	PEROXIREDOXIN
1_3	FDIA	Prupe.1G382600	1	34401033	34402297	integral to peroxisomal membrane; peroxisome fission	GO:0005779; GO:0016559	PEROXISOMAL BIOGENESIS FACTOR 11
1_3	FDIA	Prupe.1G382000	1	34379837	34383181	catalytic activity	GO:0003824	PP2Cc
1_3	FDIA	Prupe.1G382300	1	34392194	34396534			PPPDE_dom
1_4	BD	Prupe.1G551700	1	45110049	45111732	intracellular; ribosome; structural constituent of ribosome; translation	GO:0003735; GO:0005622; GO:0005840; GO:0006412	39S RIBOSOMAL PROTEIN L18, MITOCHONDRIAL
1_4	BD	Prupe.1G550200	1	44963725	44970078			AB_hydrolase
1_4	BD	Prupe.1G549400	1	44911368	44915141	hydrolase activity	GO:0016787	AB_hydrolase
1_4	BD	Prupe.1G549600	1	44924522	44931398	DNA binding; nucleus; protein dimerization activity; regulation of transcription, DNA-dependent; sequence-specific DNA binding transcription factor activity	GO:0003677; GO:0003700; GO:0005634; GO:0006355; GO:0046983	AGAMOUS-LIKE MADS-BOX PROTEIN AGL1-RELATED
1_4	BD	Prupe.1G549700	1	44932336	44937207	GTP binding	GO:0005525	AIG1
1_4	BD	Prupe.1G553500	1	45222201	45228670	protein binding	GO:0005515	AMP-ACTIVATED PROTEIN KINASE, GAMMA REGULATORY SUBUNIT
1_4	BD	Prupe.1G552200	1	45126611	45134080	protein binding	GO:0005515	B302_SPRY
1_4	BD	Prupe.1G551600	1	45106095	45108859	metal ion binding; nucleic acid binding	GO:0003676; GO:0046872	beta-beta-alpha zinc fingers
1_4	BD	Prupe.1G551900	1	45116318	45117829			Chaperone J-domain
1_4	BD	Prupe.1G550400	1	44977702	44984688	vacuolar transport	GO:0007034	CHARGED MULTIVESICULAR BODY PROTEIN 5
1_4	BD	Prupe.1G550600	1	44990491	44997520	DNA binding; nuclease activity	GO:0003677; GO:0004518	CLASS II CROSSOVER JUNCTION ENDONUCLEASE MUS81
1_4	BD	Prupe.1G549900	1	44950570	44951887	metal ion binding; metal ion transport	GO:0030001; GO:0046872	COPPER TRANSPORT PROTEIN ATOX1-RELATED
1_4	BD	Prupe.1G551100	1	45058732	45072456	ATP binding; nucleic acid binding	GO:0003676; GO:0005524	DEAD
1_4	BD	Prupe.1G551200	1	45074976	45078749	ATP binding; nucleobase-containing compound metabolic process; nucleoside kinase activity	GO:0005524; GO:0006139; GO:0019206	DEOXYNUCLEOSIDE KINASE
1_4	BD	Prupe.1G549300	1	44907599	44911258	protein binding; translational elongation; translation elongation factor activity	GO:0003746; GO:0005515; GO:0006414	eEF1-gamma domain
1_4	BD	Prupe.1G552400	1	45147535	45149977			FAF
1_4	BD	Prupe.1G551800	1	45112084	45116288	protein binding	GO:0005515	F-box
1_4	BD	Prupe.1G552500	1	45152257	45154767	iron-sulfur cluster assembly	GO:0016226	FES CLUSTER ASSEMBLY PROTEIN SUF
1_4	BD	Prupe.1G551500	1	45095636	45102903			FucosylTrfase_pln
1_4	BD	Prupe.1G552100	1	45124585	45126363	metabolic process; transferase activity, transferring hexosyl groups	GO:0008152; GO:0016758	GLUCOSYL/GLUCURONOSYL TRANSFERASES
1_4	BD	Prupe.1G551400	1	45091867	45093354	chromatin binding; DNA binding	GO:0003677; GO:0003682	Homeodomain-like
1_4	BD	Prupe.1G552900	1	45165734	45177334	phosphatidylinositol-3-phosphate biosynthetic process; phosphoric ester hydrolase activity; vacuole organization	GO:0007033; GO:0036092; GO:0042578	INOSITOL 5-PHOSPHATASE
1_4	BD	Prupe.1G550700	1	45005025	45015612	protein binding; signal transduction	GO:0005515; GO:0007165	LEUCINE-RICH REPEAT-CONTAINING PROTEIN
1_4	BD	Prupe.1G550800	1	45018636	45024176	ADP binding; protein binding; signal transduction	GO:0005515; GO:0007165; GO:0043531	Leu-rich_rpt
1_4	BD	Prupe.1G550000	1	44954321	44961039	nucleotide binding	GO:0000166	Nonsense_mediated_decay_UPF3
1_4	BD	Prupe.1G553100	1	45177945	45185117	protein binding; zinc ion binding	GO:0005515; GO:0008270	PA
1_4	BD	Prupe.1G552600	1	45158366	45159352	serine-type endopeptidase inhibitor activity	GO:0004867	Plant proteinase inhibitors
1_4	BD	Prupe.1G552700	1	45161261	45162107	serine-type endopeptidase inhibitor activity	GO:0004867	Plant proteinase inhibitors
1_4	BD	Prupe.1G552300	1	45144631	45146525	hydrolase activity, acting on acid anhydrides, catalyzing transmembrane movement of substances; proton transport; vacuolar proton-transporting V-type ATPase complex	GO:0015992; GO:0016471; GO:0016820	VACUOLAR ATP SYNTHASE SUBUNIT G
1_5	BD	Prupe.1G560600	1	45762951	45779853	calcium ion binding; phosphatidylserine decarboxylase activity; phospholipid biosynthetic process; protein binding	GO:0004609; GO:0005509; GO:0005515; GO:0008654	C2_dom
1_5	BD	Prupe.1G560500	1	45759810	45762198	carboxylic acid metabolic process; carboxy-lyase activity; catalytic activity; pyridoxal phosphate binding	GO:0003824; GO:0016831; GO:0019752; GO:0030170	carboxy-lyase activity
1_5	BD	Prupe.1G560700	1	45781290	45782238	mitochondrial electron transport, ubiquinol to cytochrome c; ubiquinol-cytochrome-c reductase activity	GO:0006122; GO:0008121	Cyt_b-c1_6
1_5	BD	Prupe.1G561000	1	45799586	45803709	cytoplasm; peptidyl-diphthamide biosynthetic process from peptidyl-histidine	GO:0005737; GO:0017183	DIPHTHAMIDE BIOSYNTHESIS PROTEIN
1_5	BD	Prupe.1G560800	1	45786677	45788261	carbohydrate metabolic process; fructose 1,6-bisphosphate 1-phosphatase activity; phosphoric ester hydrolase activity	GO:0005975; GO:0042132; GO:0042578	FBPase
1_5	BD	Prupe.1G560400	1	45755683	45758448	heme binding; oxidation-reduction process; peroxidase activity; response to oxidative stress	GO:0004601; GO:0006979; GO:0020037; GO:0055114	Haem_peroxidase_pln/fun/bac
2_1	pH	Prupe.2G310100	2	29360020	29362934	multicellular organismal development; nucleus; protein binding; protein ubiquitination; ubiquitin-dependent protein catabolic process; ubiquitin-protein ligase activity; zinc ion binding	GO:0004842; GO:0005515; GO:0005634; GO:0006511; GO:0007275; GO:0008270; GO:0016567	7-in-absentia-prot_TRAF-dom
2_1	pH	Prupe.2G308500	2	29262321	29267021			A_thal_3526
2_1	pH	Prupe.2G308200	2	29243031	29245959			ABSCISIC ACID RECEPTOR PYL10-RELATED
2_1	pH	Prupe.2G309900	2	29344526	29352983	DNA binding; protein binding; zinc ion binding	GO:0003677; GO:0005515; GO:0008270	AT_hook
2_1	pH	Prupe.2G309600	2	29322903	29336607			ATPase domain of HSP90 chaperone/DNA topoisomerase II/histidine kinase
2_1	pH	Prupe.2G310000	2	29353724	29359257	ATP binding; protein folding; unfolded protein binding	GO:0005524; GO:0006457; GO:0051082	ATP-DEPENDENT CLP PROTEASE-RELATED
2_1	pH	Prupe.2G310300	2	29368968	29373136	calcium ion binding	GO:0005509	Calcineur_B
2_1	pH	Prupe.2G308700	2	29274503	29279363	ion channel activity; ion transport; membrane; transmembrane transport	GO:0005216; GO:0006811; GO:0016020; GO:0055085	cAMP-binding domain-like
2_1	pH	Prupe.2G308800	2	29279853	29283597	ion channel activity; ion transport; membrane; transmembrane transport	GO:0005216; GO:0006811; GO:0016020; GO:0055085	cAMP-binding domain-like
2_1	pH	Prupe.2G308400	2	29257578	29261551			Chaperone J-domain
2_1	pH	Prupe.2G309400	2	29307480	29313100	biosynthetic process; glucan biosynthetic process; starch synthase activity	GO:0009011; GO:0009058; GO:0009250	glucan biosynthetic process
2_1	pH	Prupe.2G308300	2	29250089	29255569	catalytic activity; trehalose biosynthetic process	GO:0003824; GO:0005992	HAD-like
2_1	pH	Prupe.2G310200	2	29363695	29365662	protein binding	GO:0005515	HCP-like
2_1	pH	Prupe.2G309200	2	29301157	29303910	regulation of signal transduction	GO:0009966	IMMUNOGLOBULIN-BINDING PROTEIN 1
2_1	pH	Prupe.2G309500	2	29313238	29316479	protein binding	GO:0005515	IQ
2_1	pH	Prupe.2G309300	2	29304976	29306605	transport	GO:0006810	Longin
2_1	pH	Prupe.2G308600	2	29266968	29271116	catalytic activity; protein dephosphorylation; protein serine/threonine phosphatase activity	GO:0003824; GO:0004722; GO:0006470	PP2C
2_1	pH	Prupe.2G309100	2	29295363	29300340			PROKAR_LIPOPROTEIN
2_1	pH	Prupe.2G308900	2	29289289	29290762			RWP-RK_dom
3_1	Blush	Prupe.3G148400	3	16216750	16221424	ribosome; structural constituent of ribosome; translation	GO:0003735; GO:0005840; GO:0006412	39S RIBOSOMAL PROTEIN L13, MITOCHONDRIAL
3_1	Blush	Prupe.3G148600	3	16231407	16234830	ATP binding; protein binding; protein kinase activity; protein phosphorylation; transferase activity, transferring phosphorus-containing groups	GO:0004672; GO:0005515; GO:0005524; GO:0006468; GO:0016772	L domain-like
3_1	Blush	Prupe.3G148200	3	16209620	16213563			LSM
3_1	Blush	Prupe.3G148300	3	16213839	16214957			Osmotin, thaumatin-like protein
3_1	Blush	Prupe.3G148500	3	16224910	16227649			PROTEIN PLASTID MOVEMENT IMPAIRED 15-RELATED
4_1	FF	Prupe.4G030000	4	1398399	1402709			eIF-4B
4_1	FF	Prupe.4G029800	4	1386255	1388653	ATP binding; protein kinase activity; protein phosphorylation; protein serine/threonine kinase activity; transferase activity, transferring phosphorus-containing groups	GO:0004672; GO:0004674; GO:0005524; GO:0006468; GO:0016772	LEUCINE-RICH REPEAT RECEPTOR-LIKE PROTEIN KINASE
4_10	ADH	Prupe.4G257200	4	18171642	18182791	protein binding; zinc ion binding	GO:0005515; GO:0008270	BROMODOMAIN ADJACENT TO ZINC FINGER DOMAIN PROTEIN 1A
4_11	ADH	Prupe.4G262800	4	19169301	19171964	oxidation-reduction process; oxidoreductase activity; oxidoreductase activity, acting on paired donors, with incorporation or reduction of molecular oxygen, 2-oxoglutarate as one donor, and incorporation of one atom each of oxygen into both donors	GO:0016491; GO:0016706; GO:0055114	2OG-FeII_Oxy
4_11	ADH	Prupe.4G262900	4	19179766	19182254	oxidation-reduction process; oxidoreductase activity; oxidoreductase activity, acting on paired donors, with incorporation or reduction of molecular oxygen, 2-oxoglutarate as one donor, and incorporation of one atom each of oxygen into both donors	GO:0016491; GO:0016706; GO:0055114	2OG-FeII_Oxy
4_11	ADH	Prupe.4G263000	4	19202227	19204113	oxidation-reduction process; oxidoreductase activity; oxidoreductase activity, acting on paired donors, with incorporation or reduction of molecular oxygen, 2-oxoglutarate as one donor, and incorporation of one atom each of oxygen into both donors	GO:0016491; GO:0016706; GO:0055114	2OG-FeII_Oxy
4_11	ADH	Prupe.4G262100	4	19069552	19071931	oxidation-reduction process; oxidoreductase activity; zinc ion binding	GO:0008270; GO:0016491; GO:0055114	ADH_C
4_11	ADH	Prupe.4G262300	4	19084427	19086970	oxidation-reduction process; oxidoreductase activity; zinc ion binding	GO:0008270; GO:0016491; GO:0055114	ADH_C
4_11	ADH	Prupe.4G262000	4	19050703	19052218	oxidation-reduction process; oxidoreductase activity; zinc ion binding	GO:0008270; GO:0016491; GO:0055114	ADH_SF_Zn-type
4_11	ADH	Prupe.4G262600	4	19109817	19114695			cAMP-binding domain-like
4_11	ADH	Prupe.4G262700	4	19144534	19145269			cAMP-binding domain-like
4_11	ADH	Prupe.4G261000	4	18935218	18937337	cysteine-type peptidase activity; proteolysis	GO:0006508; GO:0008234	Cysteine proteinases
4_11	ADH	Prupe.4G261200	4	18966377	18970777	cysteine-type peptidase activity; proteolysis	GO:0006508; GO:0008234	Cysteine proteinases
4_11	ADH	Prupe.4G261700	4	19022760	19024278	carbohydrate metabolic process; polygalacturonase activity	GO:0004650; GO:0005975	EXOPOLYGALACTURONASE / GALACTURAN 1,4-ALPHA-GALACTURONIDASE / PECTINASE-RELATED
4_11	ADH	Prupe.4G261800	4	19028015	19029785	carbohydrate metabolic process; polygalacturonase activity	GO:0004650; GO:0005975	EXOPOLYGALACTURONASE / GALACTURAN 1,4-ALPHA-GALACTURONIDASE / PECTINASE-RELATED
4_11	ADH	Prupe.4G261900	4	19046344	19049605	carbohydrate metabolic process; polygalacturonase activity	GO:0004650; GO:0005975	EXOPOLYGALACTURONASE / GALACTURAN 1,4-ALPHA-GALACTURONIDASE / PECTINASE-RELATED
4_11	ADH	Prupe.4G262200	4	19081325	19083984	carbohydrate metabolic process; polygalacturonase activity	GO:0004650; GO:0005975	EXOPOLYGALACTURONASE / GALACTURAN 1,4-ALPHA-GALACTURONIDASE / PECTINASE-RELATED
4_11	ADH	Prupe.4G262500	4	19097350	19101902	protein binding	GO:0005515	F-box
4_11	ADH	Prupe.4G261300	4	18971486	18971845	nucleic acid binding	GO:0003676	Ribonuclease H-like
4_2	SSC	Prupe.4G123300	4	6702589	6706816	actin cytoskeleton; Arp2/3 complex-mediated actin nucleation; Arp2/3 protein complex; regulation of actin filament polymerization	GO:0005885; GO:0015629; GO:0030833; GO:0034314	ARP2/3 COMPLEX 34 KDA SUBUNIT
4_2	SSC	Prupe.4G123100	4	6692927	6696094	protein binding	GO:0005515	DNA-DAMAGE-REPAIR/TOLERATION PROTEIN DRT100-RELATED
4_2	SSC	Prupe.4G123200	4	6699371	6701034	protein binding	GO:0005515	L domain-like
4_3	RD	Prupe.4G180500	4	10699239	10703990	RNA binding	GO:0003723	Alpha-L RNA-binding motif
4_3	RD	Prupe.4G181100	4	10738335	10747338	ATP binding; protein kinase activity; protein phosphorylation; protein serine/threonine kinase activity; transferase activity, transferring phosphorus-containing groups	GO:0004672; GO:0004674; GO:0005524; GO:0006468; GO:0016772	CELL DIVISION PROTEIN KINASE
4_3	RD	Prupe.4G180800	4	10724387	10725450	carbohydrate metabolic process; chitinase activity; chitin catabolic process; hydrolase activity, hydrolyzing O-glycosyl compounds	GO:0004553; GO:0004568; GO:0005975; GO:0006032	CHITINASE
4_3	RD	Prupe.4G181000	4	10736843	10737943	carbohydrate binding	GO:0030246	ConA-like_dom
4_3	RD	Prupe.4G180200	4	10688181	10693660	GTPase activity; GTP binding	GO:0003924; GO:0005525	DYNAMIN
4_3	RD	Prupe.4G180900	4	10726786	10733522	ATP binding; protein binding; protein kinase activity; protein phosphorylation; transferase activity, transferring phosphorus-containing groups	GO:0004672; GO:0005515; GO:0005524; GO:0006468; GO:0016772	E3 UBIQUITIN-PROTEIN LIGASE COP1
4_3	RD	Prupe.4G180700	4	10718283	10722430	acetylglucosaminyltransferase activity; membrane	GO:0008375; GO:0016020	GLYCOSYLTRANSFERASE 14 FAMILY MEMBER
4_3	RD	Prupe.4G180600	4	10706498	10712265	endoplasmic reticulum; plasma membrane; regulation of proton transport	GO:0005783; GO:0005886; GO:0010155	PROTON PUMP-INTERACTOR 1-RELATED
4_4	RP,FF,SSC,DAB	Prupe.4G183000	4	10827965	10830943	3-deoxy-manno-octulosonate cytidylyltransferase activity; cytoplasm; lipopolysaccharide biosynthetic process	GO:0005737; GO:0008690; GO:0009103	3-deoxy-manno-octulosonate cytidylyltransferase activity
4_4	RP,FF,SSC,DAB	Prupe.4G183900	4	10890435	10898178			Amine compound SLC transporters
4_4	RP,FF,SSC,DAB	Prupe.4G183400	4	10861181	10863415	extracellular region; plant-type cell wall organization	GO:0005576; GO:0009664	Barwin-like_endoglucanase
4_4	RP,FF,SSC,DAB	Prupe.4G181400	4	10765095	10766926	copper chaperone activity; copper ion binding; copper ion transport; mitochondrial intermembrane space	GO:0005507; GO:0005758; GO:0006825; GO:0016531	COX17
4_4	RP,FF,SSC,DAB	Prupe.4G183100	4	10831400	10832723	microtubule associated complex; microtubule-based process	GO:0005875; GO:0007017	DLC
4_4	RP,FF,SSC,DAB	Prupe.4G183300	4	10857122	10860549	protein binding; zinc ion binding	GO:0005515; GO:0008270	E3 UBIQUITIN-PROTEIN LIGASE RMA1-RELATED
4_4	RP,FF,SSC,DAB	Prupe.4G182300	4	10812314	10813151	RNA binding; translational initiation; translation initiation factor activity	GO:0003723; GO:0003743; GO:0006413	eIF-1a
4_4	RP,FF,SSC,DAB	Prupe.4G182400	4	10813601	10814487	RNA binding; translational initiation; translation initiation factor activity	GO:0003723; GO:0003743; GO:0006413	eIF-1a
4_4	RP,FF,SSC,DAB	Prupe.4G182100	4	10805855	10806790			ESCRT-II
4_4	RP,FF,SSC,DAB	Prupe.4G183700	4	10882666	10885574	protein binding	GO:0005515	F-box
4_4	RP,FF,SSC,DAB	Prupe.4G184700	4	10948607	10954199	GTP binding; nucleolus	GO:0005525; GO:0005730	G_CP
4_4	RP,FF,SSC,DAB	Prupe.4G181900	4	10793014	10800771			GAG-POL-RELATED RETROTRANSPOSON
4_4	RP,FF,SSC,DAB	Prupe.4G184200	4	10911248	10913639	ATP binding; kinesin complex; microtubule-based movement; microtubule binding; microtubule motor activity	GO:0003777; GO:0005524; GO:0005871; GO:0007018; GO:0008017	Kinesin
4_4	RP,FF,SSC,DAB	Prupe.4G184800	4	10955113	10963854	protein binding	GO:0005515	L domain-like
4_4	RP,FF,SSC,DAB	Prupe.4G182900	4	10822915	10827070	nucleotidyltransferase activity	GO:0016779	LP06848P-RELATED
4_4	RP,FF,SSC,DAB	Prupe.4G184600	4	10946471	10947993			MITOCHONDRIAL 28S RIBOSOMAL PROTEIN S28
4_4	RP,FF,SSC,DAB	Prupe.4G184500	4	10930427	10936871	defense response; integral to membrane	GO:0006952; GO:0016021	Mlo
4_4	RP,FF,SSC,DAB	Prupe.4G183500	4	10874329	10879071	protein binding	GO:0005515	Pentatricopeptide_repeat
4_4	RP,FF,SSC,DAB	Prupe.4G184000	4	10898490	10906006			PRL1 ASSOCIATED PROTEIN-LIKE
4_4	RP,FF,SSC,DAB	Prupe.4G184900	4	10965052	10966306	nucleic acid binding	GO:0003676	Ribonuclease H-like
4_4	RP,FF,SSC,DAB	Prupe.4G185000	4	10971614	10972697	nucleic acid binding	GO:0003676	Ribonuclease H-like
4_4	RP,FF,SSC,DAB	Prupe.4G182600	4	10815979	10816956	protein binding; zinc ion binding	GO:0005515; GO:0008270	RING
4_4	RP,FF,SSC,DAB	Prupe.4G182700	4	10818810	10819608	protein binding; zinc ion binding	GO:0005515; GO:0008270	RING
4_4	RP,FF,SSC,DAB	Prupe.4G182800	4	10821182	10821971	protein binding; zinc ion binding	GO:0005515; GO:0008270	RING
4_4	RP,FF,SSC,DAB	Prupe.4G185100	4	10973640	10977165			TFIIIC_sub6
4_4	RP,FF,SSC,DAB	Prupe.4G183200	4	10841046	10843178	cell redox homeostasis; glycerol ether metabolic process; protein disulfide oxidoreductase activity	GO:0006662; GO:0015035; GO:0045454	Thioredoxin
4_4	RP,FF,SSC,DAB	Prupe.4G181600	4	10776744	10782749			UBCc
4_4	RP,FF,SSC,DAB	Prupe.4G181800	4	10788814	10789941			UBN2_3
4_4	RP,FF,SSC,DAB	Prupe.4G184300	4	10927101	10928407			WHTH_DNA-bd_dom
4_5	RD	Prupe.4G201100	4	12502827	12504384			21.7 KDA CLASS VI HEAT SHOCK PROTEIN
4_5	RD	Prupe.4G200400	4	12451606	12454500	intracellular; ribosome; structural constituent of ribosome; translation	GO:0003735; GO:0005622; GO:0005840; GO:0006412	50S RIBOSOMAL PROTEIN L24, CHLOROPLASTIC
4_5	RD	Prupe.4G200300	4	12446486	12451175	ATP binding; protein kinase activity; protein phosphorylation; transferase activity, transferring phosphorus-containing groups	GO:0004672; GO:0005524; GO:0006468; GO:0016772	ConA-like_dom
4_5	RD	Prupe.4G200600	4	12470219	12473243	metal ion binding; NAD+ ADP-ribosyltransferase activity	GO:0003950; GO:0046872	EMB|CAB89038.1-RELATED
4_5	RD	Prupe.4G200500	4	12464242	12468340	catalytic activity; coenzyme binding	GO:0003824; GO:0050662	Epimerase
4_5	RD	Prupe.4G201000	4	12493101	12500238			FH2
4_5	RD	Prupe.4G200200	4	12432037	12435877			GRAS
4_5	RD	Prupe.4G200700	4	12478770	12480367	DNA binding; nucleosome; nucleus; protein heterodimerization activity	GO:0000786; GO:0003677; GO:0005634; GO:0046982	H2A
4_5	RD	Prupe.4G201200	4	12511133	12516798	ATP binding; kinesin complex; microtubule-based movement; microtubule binding; microtubule motor activity	GO:0003777; GO:0005524; GO:0005871; GO:0007018; GO:0008017	Kinesin
4_5	RD	Prupe.4G201300	4	12516792	12518009	calcium ion binding; extrinsic to membrane; oxygen evolving complex; photosynthesis; photosystem II	GO:0005509; GO:0009523; GO:0009654; GO:0015979; GO:0019898	Oxygen-evolving enhancer protein 3
4_5	RD	Prupe.4G200900	4	12481038	12484733	rRNA processing; small-subunit processome	GO:0006364; GO:0032040	SSU_processome_Utp11
4_5	RD	Prupe.4G201400	4	12519366	12521208			Thioredoxin-like
4_6	RD	Prupe.4G209700	4	13083004	13084806			AminoTfrase-like_pln_mobile
4_6	RD	Prupe.4G209800	4	13091071	13092918			AminoTfrase-like_pln_mobile
4_6	RD	Prupe.4G209900	4	13094733	13095917	protein binding	GO:0005515	BROMO
4_6	RD	Prupe.4G210100	4	13103238	13107194	integral to membrane; transport	GO:0006810; GO:0016021	BT1
4_6	RD	Prupe.4G210000	4	13099878	13102649			Pollen_Ole_e1_allergen
4_7	BD	Prupe.4G219000	4	13770412	13778642	1,4-alpha-glucan branching enzyme activity; carbohydrate metabolic process; catalytic activity; cation binding; glycogen biosynthetic process	GO:0003824; GO:0003844; GO:0005975; GO:0005978; GO:0043169	1,4-ALPHA-GLUCAN-BRANCHING ENZYME 3, CHLOROPLASTIC/AMYLOPLASTIC
4_7	BD	Prupe.4G217500	4	13628751	13629703	endoplasmic reticulum; integral to membrane; intracellular protein transport	GO:0005783; GO:0006886; GO:0016021	4D656
4_7	BD	Prupe.4G217800	4	13671513	13674647			60S RIBOSOMAL EXPORT PROTEIN NMD3
4_7	BD	Prupe.4G221700	4	13923422	13925953	carbohydrate metabolic process; catalytic activity; hydrolase activity, hydrolyzing O-glycosyl compounds	GO:0003824; GO:0004553; GO:0005975	6-hairpin_glycosidase-like
4_7	BD	Prupe.4G220600	4	13852982	13856922			ACID PHOSPHATASE/VANADIUM-DEPENDENT HALOPEROXIDASE-RELATED PROTEIN
4_7	BD	Prupe.4G217700	4	13651237	13656034	aspartic-type endopeptidase activity; lipid metabolic process; proteolysis	GO:0004190; GO:0006508; GO:0006629	Acid proteases
4_7	BD	Prupe.4G221100	4	13890919	13895083	catalytic activity; cytosol; thiosulfate sulfurtransferase activity; tRNA wobble position uridine thiolation	GO:0002143; GO:0003824; GO:0004792; GO:0005829	Activating enzymes of the ubiquitin-like proteins
4_7	BD	Prupe.4G218800	4	13761822	13765117			Ala_racemase_N
4_7	BD	Prupe.4G221200	4	13895254	13898576	amino acid binding; aspartate carbamoyltransferase activity; carboxyl- or carbamoyltransferase activity; cellular amino acid metabolic process; 'de novo' pyrimidine base biosynthetic process	GO:0004070; GO:0006207; GO:0006520; GO:0016597; GO:0016743	Alanine, aspartate and glutamate metabolism
4_7	BD	Prupe.4G217200	4	13616701	13623785	catalytic activity; cytoplasm; histidine biosynthetic process; imidazoleglycerol-phosphate synthase activity; metabolic process; oxo-acid-lyase activity; transferase activity, transferring pentosyl groups	GO:0000105; GO:0000107; GO:0003824; GO:0005737; GO:0008152; GO:0016763; GO:0016833	Aldolase_TIM
4_7	BD	Prupe.4G222300	4	13957295	13959001	DNA binding; regulation of transcription, DNA-dependent; sequence-specific DNA binding transcription factor activity	GO:0003677; GO:0003700; GO:0006355	AP2
4_7	BD	Prupe.4G219100	4	13780011	13785169	binding	GO:0005488	ARM repeat
4_7	BD	Prupe.4G222700	4	13989032	13994572	calcium ion binding; GTP binding; protein binding	GO:0005509; GO:0005515; GO:0005525	AT21416P
4_7	BD	Prupe.4G218700	4	13758101	13760160			B561
4_7	BD	Prupe.4G220500	4	13848366	13852385	membrane	GO:0016020	Band_7
4_7	BD	Prupe.4G217000	4	13599726	13600494	lipid binding; lipid transport	GO:0006869; GO:0008289	Bifunc_inhib/LTP/seed_store
4_7	BD	Prupe.4G222800	4	13995115	13996776	protein binding	GO:0005515	BRG-1 ASSOCIATED FACTOR 60 (BAF60)
4_7	BD	Prupe.4G223200	4	14009836	14014894	adenyl-nucleotide exchange factor activity; chaperone binding; protein folding; protein homodimerization activity	GO:0000774; GO:0006457; GO:0042803; GO:0051087	chaperone binding
4_7	BD	Prupe.4G217100	4	13612772	13614595			Chloroplast_duf
4_7	BD	Prupe.4G220400	4	13842778	13848214	condensin complex; mitotic chromosome condensation	GO:0000796; GO:0007076	Cnd2
4_7	BD	Prupe.4G216500	4	13565167	13576479	ATP binding; mismatched DNA binding; mismatch repair	GO:0005524; GO:0006298; GO:0030983	DNA_MISMATCH_REPAIR_2
4_7	BD	Prupe.4G219200	4	13787080	13789315	ribonuclease III activity; RNA binding; RNA processing	GO:0003723; GO:0004525; GO:0006396	DND1_DSRM
4_7	BD	Prupe.4G219300	4	13789348	13791624	ribonuclease III activity; RNA binding; RNA processing	GO:0003723; GO:0004525; GO:0006396	DND1_DSRM
4_7	BD	Prupe.4G219400	4	13792272	13793035			DND1_DSRM
4_7	BD	Prupe.4G219600	4	13799183	13801327	ribonuclease III activity; RNA binding; RNA processing	GO:0003723; GO:0004525; GO:0006396	DND1_DSRM
4_7	BD	Prupe.4G218000	4	13687706	13692966	RNA binding; RNA processing	GO:0003723; GO:0006396	DRY_EERY
4_7	BD	Prupe.4G219500	4	13794015	13798795	ribonuclease III activity; RNA binding; RNA processing	GO:0003723; GO:0004525; GO:0006396	DS_RBD
4_7	BD	Prupe.4G216800	4	13589257	13590385			EGGSHELL
4_7	BD	Prupe.4G218100	4	13696707	13708238			ESOPHAGEAL CANCER ASSOCIATED PROTEIN
4_7	BD	Prupe.4G218900	4	13765706	13767359	carbohydrate metabolic process; polygalacturonase activity	GO:0004650; GO:0005975	EXOPOLYGALACTURONASE / GALACTURAN 1,4-ALPHA-GALACTURONIDASE / PECTINASE-RELATED
4_7	BD	Prupe.4G222500	4	13976244	13978269			F11F12.5 PROTEIN
4_7	BD	Prupe.4G222600	4	13978892	13981705			F11F12.5 PROTEIN
4_7	BD	Prupe.4G219800	4	13812515	13813988	protein binding	GO:0005515	F-box
4_7	BD	Prupe.4G219900	4	13815610	13816743	protein binding	GO:0005515	F-box
4_7	BD	Prupe.4G222200	4	13949090	13950633	protein binding	GO:0005515	F-box
4_7	BD	Prupe.4G221400	4	13905045	13907776	protein binding	GO:0005515	F-box
4_7	BD	Prupe.4G220100	4	13821097	13823211	protein binding	GO:0005515	F-box
4_7	BD	Prupe.4G221500	4	13909830	13910848	protein binding	GO:0005515	F-box
4_7	BD	Prupe.4G223000	4	14002080	14006955	protein folding; protein transport	GO:0006457; GO:0015031	FKBP_C
4_7	BD	Prupe.4G220800	4	13881721	13884906	GDP-D-glucose phosphorylase activity	GO:0080048	GDP-D-glucose phosphorylase activity
4_7	BD	Prupe.4G222100	4	13943539	13946160	carbohydrate metabolic process; hydrolase activity, hydrolyzing O-glycosyl compounds	GO:0004553; GO:0005975	Glyco_hydro_17
4_7	BD	Prupe.4G220000	4	13817112	13819488	transferase activity, transferring glycosyl groups	GO:0016757	GLYCOSYLTRANSFERASE
4_7	BD	Prupe.4G219700	4	13807289	13809101	ribonuclease III activity; RNA binding; RNA processing	GO:0003723; GO:0004525; GO:0006396	HELICASE-RELATED
4_7	BD	Prupe.4G217600	4	13634553	13635776	ATP binding; protein kinase activity; protein phosphorylation; protein serine/threonine kinase activity; transferase activity, transferring phosphorus-containing groups	GO:0004672; GO:0004674; GO:0005524; GO:0006468; GO:0016772	Kinase-like_dom
4_7	BD	Prupe.4G220900	4	13886441	13886708	intracellular; ribosome; structural constituent of ribosome; translation	GO:0003735; GO:0005622; GO:0005840; GO:0006412	L28p-like
4_7	BD	Prupe.4G216400	4	13563491	13565423	hydrolase activity, acting on ester bonds; lipid metabolic process	GO:0006629; GO:0016788	Lipase_GDSL
4_7	BD	Prupe.4G222900	4	13997208	13999176	hydrolase activity, acting on ester bonds; lipid metabolic process	GO:0006629; GO:0016788	Lipase_GDSL
4_7	BD	Prupe.4G221000	4	13887043	13891184	nucleic acid binding; nucleotide binding	GO:0000166; GO:0003676	Nucleotide-bd_a/b_plait
4_7	BD	Prupe.4G216600	4	13580329	13586235	Rab GTPase activator activity	GO:0005097	Rab3-GAP_cat_su
4_7	BD	Prupe.4G221800	4	13931321	13932767	protein binding	GO:0005515	Rad60-SLD
4_7	BD	Prupe.4G221900	4	13933946	13935293	protein binding	GO:0005515	Rad60-SLD
4_7	BD	Prupe.4G222000	4	13936440	13937556	protein binding	GO:0005515	Rad60-SLD
4_7	BD	Prupe.4G218300	4	13724337	13725270			Stig1
4_7	BD	Prupe.4G218500	4	13749063	13749521			Stig1
4_7	BD	Prupe.4G218600	4	13754910	13755368			Stig1
4_7	BD	Prupe.4G221300	4	13901818	13902330			Stig1
4_7	BD	Prupe.4G217900	4	13677276	13680167	regulation of transcription, DNA-dependent; sequence-specific DNA binding; sequence-specific DNA binding transcription factor activity	GO:0003700; GO:0006355; GO:0043565	WRKY
4_7	BD	Prupe.4G218200	4	13719441	13720708	DNA binding	GO:0003677	zf-BED
4_8	SSC	Prupe.4G231400	4	14822986	14825000	ribosome; structural constituent of ribosome; translation	GO:0003735; GO:0005840; GO:0006412	30S RIBOSOMAL PROTEIN S8
4_8	SSC	Prupe.4G230200	4	14748245	14750381	intracellular; ribosome; structural constituent of ribosome; translation	GO:0003735; GO:0005622; GO:0005840; GO:0006412	40S RIBOSOMAL PROTEIN S8
4_8	SSC	Prupe.4G230400	4	14752384	14753976	catalytic activity; flavin adenine dinucleotide binding; oxidation-reduction process; oxidoreductase activity; oxidoreductase activity, acting on CH-OH group of donors; UDP-N-acetylmuramate dehydrogenase activity	GO:0003824; GO:0008762; GO:0016491; GO:0016614; GO:0050660; GO:0055114	Amino sugar and nucleotide sugar metabolism
4_8	SSC	Prupe.4G231700	4	14848143	14851029	protein binding	GO:0005515	C2_dom
4_8	SSC	Prupe.4G232700	4	14969651	14971219			C2H2-LIKE ZINC FINGER PROTEIN
4_8	SSC	Prupe.4G235000	4	15165204	15175086	catalytic activity; flavin adenine dinucleotide binding; oxidation-reduction process; oxidoreductase activity, acting on CH-OH group of donors	GO:0003824; GO:0016614; GO:0050660; GO:0055114	CBS
4_8	SSC	Prupe.4G234600	4	15128855	15132685	metal ion binding; nucleic acid binding; nucleotide binding	GO:0000166; GO:0003676; GO:0046872	CCCH zinc finger
4_8	SSC	Prupe.4G234100	4	15099757	15103990	double-stranded DNA binding; mitochondrion; regulation of transcription, DNA-dependent	GO:0003690; GO:0005739; GO:0006355	CGI-12 PROTEIN-RELATED
4_8	SSC	Prupe.4G234400	4	15121964	15125566	double-stranded DNA binding; mitochondrion; regulation of transcription, DNA-dependent	GO:0003690; GO:0005739; GO:0006355	CGI-12 PROTEIN-RELATED
4_8	SSC	Prupe.4G230700	4	14771368	14778129	ATP binding; protein binding; protein kinase activity; protein phosphorylation; protein serine/threonine kinase activity; transferase activity, transferring phosphorus-containing groups	GO:0004672; GO:0004674; GO:0005515; GO:0005524; GO:0006468; GO:0016772	ConA-like_dom
4_8	SSC	Prupe.4G231100	4	14808887	14816969	ATP binding; protein binding; protein kinase activity; protein phosphorylation; protein serine/threonine kinase activity; transferase activity, transferring phosphorus-containing groups	GO:0004672; GO:0004674; GO:0005515; GO:0005524; GO:0006468; GO:0016772	ConA-like_dom
4_8	SSC	Prupe.4G234700	4	15149791	15150697			COPPER TRANSPORT PROTEIN ATOX1-RELATED
4_8	SSC	Prupe.4G234800	4	15159385	15160512	metal ion binding; metal ion transport	GO:0030001; GO:0046872	COPPER TRANSPORT PROTEIN ATOX1-RELATED
4_8	SSC	Prupe.4G230100	4	14742589	14745854	heme a biosynthetic process; integral to membrane; membrane; oxidation-reduction process; oxidoreductase activity, acting on the CH-CH group of donors	GO:0006784; GO:0016020; GO:0016021; GO:0016627; GO:0055114	COX15-CtaA
4_8	SSC	Prupe.4G233700	4	15078911	15082808			Cysteine proteinases
4_8	SSC	Prupe.4G232400	4	14895735	14899267	protein binding	GO:0005515	DNA-DAMAGE-REPAIR/TOLERATION PROTEIN DRT100-RELATED
4_8	SSC	Prupe.4G233100	4	14992812	14995782	protein binding	GO:0005515	DNA-DAMAGE-REPAIR/TOLERATION PROTEIN DRT100-RELATED
4_8	SSC	Prupe.4G233200	4	15022777	15025678	protein binding	GO:0005515	DNA-DAMAGE-REPAIR/TOLERATION PROTEIN DRT100-RELATED
4_8	SSC	Prupe.4G234000	4	15093143	15093721	protein binding	GO:0005515	DNA-DAMAGE-REPAIR/TOLERATION PROTEIN DRT100-RELATED
4_8	SSC	Prupe.4G232500	4	14956240	14960777			Frigida
4_8	SSC	Prupe.4G233000	4	14976407	14979370			GRAS
4_8	SSC	Prupe.4G234500	4	15126209	15127877	DNA binding; nucleosome; protein heterodimerization activity	GO:0000786; GO:0003677; GO:0046982	H3
4_8	SSC	Prupe.4G231200	4	14817882	14818933	metal ion binding; metal ion transport	GO:0030001; GO:0046872	HeavyMe-assoc_HMA
4_8	SSC	Prupe.4G232100	4	14875592	14877092	ATP binding; protein kinase activity; protein phosphorylation; transferase activity, transferring phosphorus-containing groups	GO:0004672; GO:0005524; GO:0006468; GO:0016772	Kinase-like_dom
4_8	SSC	Prupe.4G231600	4	14826303	14832514	ATP binding; kinesin complex; microtubule-based movement; microtubule binding; microtubule motor activity	GO:0003777; GO:0005524; GO:0005871; GO:0007018; GO:0008017	Kinesin
4_8	SSC	Prupe.4G232000	4	14868155	14870231	ATP binding; protein binding; protein kinase activity; protein phosphorylation; transferase activity, transferring phosphorus-containing groups	GO:0004672; GO:0005515; GO:0005524; GO:0006468; GO:0016772	L domain-like
4_8	SSC	Prupe.4G233600	4	15072620	15075301	protein binding	GO:0005515	L domain-like
4_8	SSC	Prupe.4G234200	4	15106954	15109962	protein binding	GO:0005515	L domain-like
4_8	SSC	Prupe.4G232800	4	14972861	14974731	transferase activity, transferring phosphorus-containing groups	GO:0016772	LEUCINE-RICH REPEAT RECEPTOR-LIKE PROTEIN KINASE
4_8	SSC	Prupe.4G231800	4	14851404	14856525			Leu-rich_rpt_RNase_inh_sub-typ
4_8	SSC	Prupe.4G230300	4	14750292	14751885			LYSINE DECARBOXYLASE-RELATED
4_8	SSC	Prupe.4G230500	4	14766763	14768905			LYSINE DECARBOXYLASE-RELATED
4_8	SSC	Prupe.4G231300	4	14819613	14822106			MITOCHONDRIAL IMPORT INNER MEMBRANE TRANSLOCASE SUBUNIT TIM22
4_8	SSC	Prupe.4G230600	4	14769628	14771233	DNA binding; regulation of transcription, DNA-dependent	GO:0003677; GO:0006355	NAC
4_8	SSC	Prupe.4G230900	4	14794681	14796205	DNA binding; regulation of transcription, DNA-dependent	GO:0003677; GO:0006355	NAC
4_8	SSC	Prupe.4G231000	4	14804110	14805629	DNA binding; regulation of transcription, DNA-dependent	GO:0003677; GO:0006355	NAC
4_8	SSC	Prupe.4G233800	4	15089019	15089688			NAM-associated
4_8	SSC	Prupe.4G231900	4	14857477	14861139	nucleic acid binding; nucleotide binding	GO:0000166; GO:0003676	Nucleotide-bd_a/b_plait
4_8	SSC	Prupe.4G234300	4	15118949	15119512	cell redox homeostasis; glycerol ether metabolic process; protein disulfide oxidoreductase activity	GO:0006662; GO:0015035; GO:0045454	Thioredoxin
4_8	SSC	Prupe.4G230800	4	14786273	14786749			UBN2
4_8	SSC	Prupe.4G233400	4	15037817	15038210			UBN2_2
4_8	SSC	Prupe.4G232600	4	14962126	14967810	regulation of transcription, DNA-dependent; sequence-specific DNA binding; sequence-specific DNA binding transcription factor activity	GO:0003700; GO:0006355; GO:0043565	WRKY
4_9	ADH	Prupe.4G248100	4	16522995	16525358	oxidation-reduction process; oxidoreductase activity; oxidoreductase activity, acting on paired donors, with incorporation or reduction of molecular oxygen, 2-oxoglutarate as one donor, and incorporation of one atom each of oxygen into both donors	GO:0016491; GO:0016706; GO:0055114	2OG-FeII_Oxy
4_9	ADH	Prupe.4G248200	4	16530375	16534967	oxidation-reduction process; oxidoreductase activity; oxidoreductase activity, acting on paired donors, with incorporation or reduction of molecular oxygen, 2-oxoglutarate as one donor, and incorporation of one atom each of oxygen into both donors	GO:0016491; GO:0016706; GO:0055114	2OG-FeII_Oxy
4_9	ADH	Prupe.4G248300	4	16572312	16574906	oxidation-reduction process; oxidoreductase activity; oxidoreductase activity, acting on paired donors, with incorporation or reduction of molecular oxygen, 2-oxoglutarate as one donor, and incorporation of one atom each of oxygen into both donors	GO:0016491; GO:0016706; GO:0055114	2OG-FeII_Oxy
4_9	ADH	Prupe.4G248400	4	16583651	16585489	oxidation-reduction process; oxidoreductase activity; oxidoreductase activity, acting on paired donors, with incorporation or reduction of molecular oxygen, 2-oxoglutarate as one donor, and incorporation of one atom each of oxygen into both donors	GO:0016491; GO:0016706; GO:0055114	2OG-FeII_Oxy
4_9	ADH	Prupe.4G248600	4	16602327	16605042	oxidation-reduction process; oxidoreductase activity; oxidoreductase activity, acting on paired donors, with incorporation or reduction of molecular oxygen, 2-oxoglutarate as one donor, and incorporation of one atom each of oxygen into both donors	GO:0016491; GO:0016706; GO:0055114	2OG-FeII_Oxy
4_9	ADH	Prupe.4G248900	4	16634161	16638296	metal ion binding; protein binding	GO:0005515; GO:0046872	ANK
4_9	ADH	Prupe.4G248700	4	16608772	16611634	ADP binding; protein binding; signal transduction	GO:0005515; GO:0007165; GO:0043531	L domain-like
4_9	ADH	Prupe.4G248800	4	16628387	16633920	antiporter activity; drug transmembrane transport; drug transmembrane transporter activity; membrane; transmembrane transport	GO:0006855; GO:0015238; GO:0015297; GO:0016020; GO:0055085	MatE
4_9	ADH	Prupe.4G249200	4	16656643	16659907			RVT_3
5_1	FT	Prupe.5G003400	5	464208	470729	6-phosphofructokinase activity; ATP binding; diphosphate-fructose-6-phosphate 1-phosphotransferase activity; glycolysis	GO:0003872; GO:0005524; GO:0006096; GO:0047334	6-phosphofructokinase activity
5_1	FT	Prupe.5G002300	5	377713	384289	DNA binding; nucleus	GO:0003677; GO:0005634	Ankyrin repeat
5_1	FT	Prupe.5G003000	5	434425	435739	regulation of transcription, DNA-dependent; sequence-specific DNA binding; sequence-specific DNA binding transcription factor activity	GO:0003700; GO:0006355; GO:0043565	BRLZ
5_1	FT	Prupe.5G002900	5	426639	430557			Bub1/Mad3
5_1	FT	Prupe.5G002200	5	373928	375462	oxidation-reduction process; protein-disulfide reductase activity	GO:0047134; GO:0055114	C1_3
5_1	FT	Prupe.5G002700	5	404568	408672	membrane; photosynthesis, light harvesting	GO:0009765; GO:0016020	Chloro_AB-bd_pln
5_1	FT	Prupe.5G002800	5	408872	410006			CP12
5_1	FT	Prupe.5G002000	5	330808	341537	flavin adenine dinucleotide binding; tRNA processing; tRNA wobble uridine modification	GO:0002098; GO:0008033; GO:0050660	FAD/NAD(P)-binding domain
5_1	FT	Prupe.5G003300	5	453806	456413			GCK
5_1	FT	Prupe.5G003200	5	450967	452809	nucleolus; ribonucleoprotein complex; ribosome biogenesis; RNA binding	GO:0003723; GO:0005730; GO:0030529; GO:0042254	Gene Expression
5_1	FT	Prupe.5G003100	5	436756	438971			Pentatricopeptide_repeat
5_1	FT	Prupe.5G002600	5	401489	403076			RVT_3
5_2	pH	Prupe.5G005700	5	673356	677657	3-beta-hydroxy-delta5-steroid dehydrogenase activity; oxidation-reduction process; oxidoreductase activity, acting on the CH-OH group of donors, NAD or NADP as acceptor; steroid biosynthetic process	GO:0003854; GO:0006694; GO:0016616; GO:0055114	3Beta_HSD
5_2	pH	Prupe.5G004500	5	563911	574674	DNA binding	GO:0003677	a-crystallin/Hsp20_dom
5_2	pH	Prupe.5G006000	5	691146	695176			a-crystallin/Hsp20_dom
5_2	pH	Prupe.5G007500	5	800405	810447	amino acid binding; aspartate family amino acid biosynthetic process; aspartate kinase activity; cellular amino acid biosynthetic process; cellular amino acid metabolic process; homoserine dehydrogenase activity; metabolic process; NADP binding; oxidation-reduction process; oxidoreductase activity	GO:0004072; GO:0004412; GO:0006520; GO:0008152; GO:0008652; GO:0009067; GO:0016491; GO:0016597; GO:0050661; GO:0055114	ACT_dom
5_2	pH	Prupe.5G005600	5	668929	672978	DNA binding	GO:0003677	AF0104/ALDC/Ptd012-like
5_2	pH	Prupe.5G004600	5	578564	581015			AF0104/ALDC/Ptd012-like
5_2	pH	Prupe.5G006500	5	726750	729248	ATP hydrolysis coupled proton transport; ion transmembrane transport; proton-transporting ATPase activity, rotational mechanism; proton-transporting V-type ATPase, V1 domain	GO:0015991; GO:0033180; GO:0034220; GO:0046961	ATPase_V1-cplx_f_g_su
5_2	pH	Prupe.5G004100	5	531997	535290	integral to membrane; transmembrane transport	GO:0016021; GO:0055085	Auxin_eff
5_2	pH	Prupe.5G004300	5	549450	554169	integral to membrane; transmembrane transport	GO:0016021; GO:0055085	Auxin_eff
5_2	pH	Prupe.5G004800	5	593906	597456	catalytic activity; coenzyme binding	GO:0003824; GO:0050662	CINNAMOYL-COA REDUCTASE-RELATED
5_2	pH	Prupe.5G004900	5	599099	600905	catalytic activity; coenzyme binding	GO:0003824; GO:0050662	CINNAMOYL-COA REDUCTASE-RELATED
5_2	pH	Prupe.5G005000	5	609148	611053	catalytic activity; coenzyme binding	GO:0003824; GO:0050662	CINNAMOYL-COA REDUCTASE-RELATED
5_2	pH	Prupe.5G006900	5	745051	749517	dolichyl-diphosphooligosaccharide-protein glycotransferase activity; endoplasmic reticulum; integral to membrane; protein glycosylation	GO:0004579; GO:0005783; GO:0006486; GO:0016021	DOLICHYL-DIPHOSPHOOLIGOSACCHARIDE--PROTEIN GLYCOSYLTRANSFERASE SUBUNIT 1
5_2	pH	Prupe.5G005100	5	618202	619324	eukaryotic translation elongation factor 1 complex; translational elongation; translation elongation factor activity	GO:0003746; GO:0005853; GO:0006414	eEF-1beta-like
5_2	pH	Prupe.5G007000	5	749989	752304	protein folding	GO:0006457	FKBP_C
5_2	pH	Prupe.5G006600	5	729848	733588	Golgi apparatus; mRNA binding; mRNA splice site selection; nucleotide-sugar transport; U1 snRNP	GO:0003729; GO:0005685; GO:0005794; GO:0006376; GO:0015780	GDP-MANNOSE TRANSPORTER GONST3
5_2	pH	Prupe.5G005800	5	678526	679718	metal ion binding; metal ion transport	GO:0030001; GO:0046872	HeavyMe-assoc_HMA
5_2	pH	Prupe.5G005400	5	630597	634002	chromatin binding; DNA binding; protein binding	GO:0003677; GO:0003682; GO:0005515	Homeodomain-like
5_2	pH	Prupe.5G006100	5	696032	698833	integral to membrane; transmembrane transport; transmembrane transporter activity; transporter activity	GO:0005215; GO:0016021; GO:0022857; GO:0055085	INORGANIC PHOSPHATE TRANSPORTER 1-8-RELATED
5_2	pH	Prupe.5G006300	5	717623	722550	integral to membrane; membrane; substrate-specific transmembrane transporter activity; transmembrane transport; transmembrane transporter activity; transporter activity	GO:0005215; GO:0016020; GO:0016021; GO:0022857; GO:0022891; GO:0055085	MFS
5_2	pH	Prupe.5G007100	5	758145	762410	defense response; integral to membrane	GO:0006952; GO:0016021	Mlo
5_2	pH	Prupe.5G005500	5	634359	636669	calcium ion binding; extrinsic to membrane; oxygen evolving complex; photosynthesis; photosystem II	GO:0005509; GO:0009523; GO:0009654; GO:0015979; GO:0019898	Mog1p/PsbP-like
5_2	pH	Prupe.5G006200	5	707797	710859	DNA binding; regulation of transcription, DNA-dependent	GO:0003677; GO:0006355	NAC
5_2	pH	Prupe.5G005300	5	622814	628227	nucleic acid binding; nucleotide binding	GO:0000166; GO:0003676	Nucleotide-bd_a/b_plait
5_2	pH	Prupe.5G006700	5	740536	741482	protein binding; zinc ion binding	GO:0005515; GO:0008270	RING
5_2	pH	Prupe.5G007200	5	764591	770037	zinc ion binding	GO:0008270	zf-DHHC
5_4	SSC	Prupe.5G019600	5	2132202	2134595	intracellular; ribosome; structural constituent of ribosome; translation	GO:0003735; GO:0005622; GO:0005840; GO:0006412	60S RIBOSOMAL PROTEIN L13
5_4	SSC	Prupe.5G019700	5	2179329	2181963	amino acid transmembrane transport; amino acid transmembrane transporter activity; membrane	GO:0003333; GO:0015171; GO:0016020	AA_permease_2
5_4	SSC	Prupe.5G019500	5	2128545	2130491	fatty-acyl-CoA binding	GO:0000062	ACB_1
5_4	SSC	Prupe.5G019900	5	2186784	2188842	protein binding	GO:0005515	ANK
5_4	SSC	Prupe.5G019200	5	2095972	2105358	protein binding	GO:0005515	C2_dom
5_4	SSC	Prupe.5G019300	5	2116428	2117853	ATP binding; nucleic acid binding	GO:0003676; GO:0005524	DEAD
5_4	SSC	Prupe.5G020200	5	2222331	2226868	endoplasmic reticulum; Golgi vesicle transport	GO:0005783; GO:0048193	endoplasmic reticulum
5_4	SSC	Prupe.5G019100	5	2090139	2096146	membrane; transmembrane transport; transport; transporter activity	GO:0005215; GO:0006810; GO:0016020; GO:0055085	Na/solute_symporter
5_4	SSC	Prupe.5G020600	5	2239064	2240663			REVERSE TRANSCRIPTASES
5_4	SSC	Prupe.5G019400	5	2124121	2128259			RIBONUCLEASE P PROTEIN SUBUNIT P38-RELATED
5_4	SSC	Prupe.5G019800	5	2183309	2186596			START-like_dom
5_6	Blush	Prupe.5G208700	5	16635402	16638496	mitochondrial inner membrane; transmembrane transport; transport; transporter activity	GO:0005215; GO:0005743; GO:0006810; GO:0055085	Aden_trnslctor
5_6	Blush	Prupe.5G208600	5	16633169	16635401	response to stress	GO:0006950	ADENINE NUCLEOTIDE ALPHA HYDROLASE-LIKE PROTEIN-RELATED
5_6	Blush	Prupe.5G208400	5	16620814	16625385	DNA binding; nucleus; protein dimerization activity; regulation of transcription, DNA-dependent; sequence-specific DNA binding transcription factor activity	GO:0003677; GO:0003700; GO:0005634; GO:0006355; GO:0046983	AGAMOUS-LIKE MADS-BOX PROTEIN AGL3-RELATED
5_6	Blush	Prupe.5G208500	5	16629361	16632684	DNA binding; nucleus; protein dimerization activity; regulation of transcription, DNA-dependent; sequence-specific DNA binding transcription factor activity	GO:0003677; GO:0003700; GO:0005634; GO:0006355; GO:0046983	AGAMOUS-LIKE MADS-BOX PROTEIN AGL8-RELATED
5_6	Blush	Prupe.5G209200	5	16649145	16650478	hydrolase activity	GO:0016787	Asparaginase_2
5_6	Blush	Prupe.5G209700	5	16684938	16686584	hydrolase activity	GO:0016787	Asparaginase_2
5_6	Blush	Prupe.5G207700	5	16561815	16567271	protein binding	GO:0005515	CLEAVAGE STIMULATION FACTOR SUBUNIT 1
5_6	Blush	Prupe.5G207800	5	16567965	16571794	anchored to membrane; cell growth; cellulose microfibril organization	GO:0010215; GO:0016049; GO:0031225	COBRA
5_6	Blush	Prupe.5G207900	5	16571838	16574272	anchored to membrane; cell growth; cellulose microfibril organization	GO:0010215; GO:0016049; GO:0031225	COBRA
5_6	Blush	Prupe.5G208000	5	16574962	16577617	anchored to membrane; cell growth; cellulose microfibril organization	GO:0010215; GO:0016049; GO:0031225	COBRA
5_6	Blush	Prupe.5G208100	5	16582772	16585136	anchored to membrane; cell growth; cellulose microfibril organization	GO:0010215; GO:0016049; GO:0031225	COBRA
5_6	Blush	Prupe.5G209000	5	16646073	16647140	sulfotransferase activity	GO:0008146	CYTOSOLIC SULFOTRANSFERASE 1-RELATED
5_6	Blush	Prupe.5G209100	5	16647502	16648764	sulfotransferase activity	GO:0008146	CYTOSOLIC SULFOTRANSFERASE 1-RELATED
5_6	Blush	Prupe.5G209500	5	16682047	16683126	sulfotransferase activity	GO:0008146	CYTOSOLIC SULFOTRANSFERASE 1-RELATED
5_6	Blush	Prupe.5G209600	5	16683749	16684750	sulfotransferase activity	GO:0008146	CYTOSOLIC SULFOTRANSFERASE 1-RELATED
5_6	Blush	Prupe.5G209300	5	16651856	16659429	ATP binding; nucleic acid binding	GO:0003676; GO:0005524	DEAD
5_6	Blush	Prupe.5G209800	5	16687185	16697714	ATP binding; nucleic acid binding; protein binding	GO:0003676; GO:0005515; GO:0005524	DEAD
5_6	Blush	Prupe.5G208900	5	16641861	16644733	polygalacturonate 4-alpha-galacturonosyltransferase activity; transferase activity, transferring glycosyl groups	GO:0016757; GO:0047262	GALACTURONOSYLTRANSFERASE 11-RELATED
5_6	Blush	Prupe.5G209400	5	16678595	16680394	polygalacturonate 4-alpha-galacturonosyltransferase activity; transferase activity, transferring glycosyl groups	GO:0016757; GO:0047262	GALACTURONOSYLTRANSFERASE 11-RELATED
5_6	Blush	Prupe.5G208200	5	16606205	16608512	cellulose biosynthetic process; intramolecular transferase activity	GO:0016866; GO:0030244	Nucleotide-diphospho-sugar transferases
5_6	Blush	Prupe.5G207600	5	16559158	16561258			Pentatricopeptide_repeat
5_6	Blush	Prupe.5G208300	5	16610659	16614654	DNA binding; nucleus	GO:0003677; GO:0005634	SBP
6_1	FW	Prupe.6G152500	6	13260544	13264217	chloroplast; dihydrodipicolinate reductase activity; lysine biosynthetic process via diaminopimelate; NADPH binding; oxidation-reduction process	GO:0008839; GO:0009089; GO:0009507; GO:0055114; GO:0070402	4-hydroxy-tetrahydrodipicolinate reductase
6_1	FW	Prupe.6G153100	6	13320076	13329346	hydrolase activity	GO:0016787	ADENOSINE/GUANOSINE DIPHOSPHATASE
6_1	FW	Prupe.6G153800	6	13385276	13395041	metal ion binding	GO:0046872	ARS2
6_1	FW	Prupe.6G153000	6	13288500	13289846	chlorophyll biosynthetic process; cofactor biosynthetic process; geranylgeranyl reductase activity; metabolic process; oxidation-reduction process; oxidoreductase activity; oxidoreductase activity, acting on the CH-CH group of donors, NAD or NADP as acceptor; photosynthesis	GO:0008152; GO:0015979; GO:0015995; GO:0016491; GO:0016628; GO:0045550; GO:0051188; GO:0055114	BchP_ChlP_pln/prok
6_1	FW	Prupe.6G154400	6	13434407	13441887	ATP binding; cellular protein metabolic process; protein folding; unfolded protein binding	GO:0005524; GO:0006457; GO:0044267; GO:0051082	Chap_CCT_eta
6_1	FW	Prupe.6G154600	6	13482971	13486045	electron carrier activity	GO:0009055	Cu_bind_like
6_1	FW	Prupe.6G154700	6	13486360	13487462	electron carrier activity	GO:0009055	Cu_bind_like
6_1	FW	Prupe.6G155100	6	13535316	13540604	copper ion binding; extracellular region; oxidation-reduction process; oxidoreductase activity	GO:0005507; GO:0005576; GO:0016491; GO:0055114	Cu-oxidase
6_1	FW	Prupe.6G154300	6	13426333	13433819	oxidation-reduction process; oxidoreductase activity	GO:0016491; GO:0055114	CYTB5RDTASE
6_1	FW	Prupe.6G153300	6	13338258	13340299	ADP binding	GO:0043531	DISEASE RESISTANCE RPP8-LIKE PROTEIN 3-RELATED
6_1	FW	Prupe.6G153400	6	13341770	13344952	ADP binding	GO:0043531	DISEASE RESISTANCE RPP8-LIKE PROTEIN 3-RELATED
6_1	FW	Prupe.6G153500	6	13345018	13349435	DNA repair; Smc5-Smc6 complex	GO:0006281; GO:0030915	DNA repair
6_1	FW	Prupe.6G152600	6	13265435	13265689	calcium ion binding	GO:0005509	EF-hand
6_1	FW	Prupe.6G154800	6	13488457	13497280	nucleic acid binding; protein binding	GO:0003676; GO:0005515	EUKARYOTIC TRANSLATION INITIATION FACTOR 2C
6_1	FW	Prupe.6G154200	6	13425134	13425912	protein binding	GO:0005515	F-box
6_1	FW	Prupe.6G152700	6	13276058	13278827	protein binding	GO:0005515	F-box
6_1	FW	Prupe.6G154100	6	13414910	13420113	protein binding	GO:0005515	FHA
6_1	FW	Prupe.6G152900	6	13285842	13288373	hydrolase activity, acting on ester bonds; lipid metabolic process	GO:0006629; GO:0016788	GDSL-MOTIF LIPASE/HYDROLASE FAMILY PROTEIN
6_1	FW	Prupe.6G153900	6	13396519	13405317	molybdopterin cofactor biosynthetic process; Mo-molybdopterin cofactor biosynthetic process	GO:0006777; GO:0032324	GEPHYRIN
6_1	FW	Prupe.6G155200	6	13551832	13553764	carbohydrate metabolic process; polygalacturonase activity	GO:0004650; GO:0005975	Glyco_hydro_28
6_1	FW	Prupe.6G152400	6	13258945	13260447			Hyccin
6_1	FW	Prupe.6G154900	6	13504600	13508836	protein binding	GO:0005515	L domain-like
6_1	FW	Prupe.6G154500	6	13442466	13444052			L domain-like
6_1	FW	Prupe.6G153200	6	13329804	13332017	ADP binding	GO:0043531	L domain-like
6_2	RP	Prupe.6G341300	6	29472979	29473522			39S RIBOSOMAL PROTEIN L40, MITOCHONDRIAL
6_2	RP	Prupe.6G339300	6	29372357	29374477	intracellular; nucleotide binding; ribosome; structural constituent of ribosome; translation	GO:0000166; GO:0003735; GO:0005622; GO:0005840; GO:0006412	40S RIBOSOMAL PROTEIN S24
6_2	RP	Prupe.6G340700	6	29442031	29444410	intracellular; ribosome; structural constituent of ribosome; translation	GO:0003735; GO:0005622; GO:0005840; GO:0006412	40S RIBOSOMAL PROTEIN S3A
6_2	RP	Prupe.6G338500	6	29344718	29354972	5'-3' exoribonuclease activity; exonuclease activity; nucleic acid binding; nucleobase-containing compound metabolic process; nucleus; zinc ion binding	GO:0003676; GO:0004527; GO:0004534; GO:0005634; GO:0006139; GO:0008270	5_3_exoribonuclease
6_2	RP	Prupe.6G338700	6	29357338	29358459			A_IG002N01.32 PROTEIN-RELATED
6_2	RP	Prupe.6G338800	6	29359747	29362232			A_IG002N01.32 PROTEIN-RELATED
6_2	RP	Prupe.6G336800	6	29239244	29244335	transferase activity, transferring acyl groups other than amino-acyl groups	GO:0016747	AB_hydrolase
6_2	RP	Prupe.6G340500	6	29432637	29436066			AB_hydrolase
6_2	RP	Prupe.6G337400	6	29271164	29271667	N-acetyltransferase activity	GO:0008080	Acetyltransf_3
6_2	RP	Prupe.6G344200	6	29602734	29603314	aspartic-type endopeptidase activity; proteolysis	GO:0004190; GO:0006508	Acid proteases
6_2	RP	Prupe.6G344300	6	29604594	29606021	aspartic-type endopeptidase activity; proteolysis	GO:0004190; GO:0006508	Acid proteases
6_2	RP	Prupe.6G344400	6	29606878	29608390	aspartic-type endopeptidase activity; proteolysis	GO:0004190; GO:0006508	Acid proteases
6_2	RP	Prupe.6G346300	6	29675807	29677081	aspartic-type endopeptidase activity; proteolysis	GO:0004190; GO:0006508	Acid proteases
6_2	RP	Prupe.6G346400	6	29678539	29679623	aspartic-type endopeptidase activity; proteolysis	GO:0004190; GO:0006508	Acid proteases
6_2	RP	Prupe.6G346800	6	29692379	29697403	ATP binding; catalytic activity; 'de novo' IMP biosynthetic process; metal ion binding; phosphoribosylaminoimidazole carboxylase activity	GO:0003824; GO:0004638; GO:0005524; GO:0006189; GO:0046872	AIRC
6_2	RP	Prupe.6G345600	6	29650992	29652996	nucleic acid binding	GO:0003676	Alba
6_2	RP	Prupe.6G342300	6	29511086	29513239	oxidation-reduction process; oxidoreductase activity	GO:0016491; GO:0055114	ALDO/KETO REDUCTASE
6_2	RP	Prupe.6G341900	6	29494272	29497210			ALDO/KETO REDUCTASE
6_2	RP	Prupe.6G342000	6	29497598	29503580	damaged DNA binding; nucleotide-excision repair; nucleus	GO:0003684; GO:0005634; GO:0006289	ALDO/KETO REDUCTASE
6_2	RP	Prupe.6G342100	6	29503937	29506892			ALDO/KETO REDUCTASE
6_2	RP	Prupe.6G342200	6	29507479	29510557			ALDO/KETO REDUCTASE
6_2	RP	Prupe.6G340000	6	29398577	29402496	carotene 7,8-desaturase activity; carotenoid biosynthetic process; oxidation-reduction process; oxidoreductase activity	GO:0016117; GO:0016491; GO:0016719; GO:0055114	Amino_oxidase
6_2	RP	Prupe.6G344800	6	29614843	29618808	protein binding	GO:0005515	ANK
6_2	RP	Prupe.6G339100	6	29367389	29370678	catalytic activity; hydrolase activity; zinc ion binding	GO:0003824; GO:0008270; GO:0016787	APOBEC/CMP_deaminase_Zn-bd
6_2	RP	Prupe.6G338000	6	29291433	29309475	binding; protein transport	GO:0005488; GO:0015031	ARM repeat
6_2	RP	Prupe.6G343700	6	29575247	29576745	nucleus; protein dimerization activity; regulation of transcription, DNA-dependent	GO:0005634; GO:0006355; GO:0046983	AUX_IAA
6_2	RP	Prupe.6G343800	6	29582927	29585218	nucleus; protein dimerization activity; regulation of transcription, DNA-dependent	GO:0005634; GO:0006355; GO:0046983	AUX_IAA
6_2	RP	Prupe.6G343900	6	29587101	29588073	defense response to bacterium; defense response to fungus	GO:0042742; GO:0050832	Barwin
6_2	RP	Prupe.6G344000	6	29589981	29590792	defense response to bacterium; defense response to fungus	GO:0042742; GO:0050832	Barwin
6_2	RP	Prupe.6G343100	6	29545141	29548929	regulation of transcription, DNA-dependent; sequence-specific DNA binding; sequence-specific DNA binding transcription factor activity	GO:0003700; GO:0006355; GO:0043565	BASIC LEUCINE ZIPPER 10-RELATED
6_2	RP	Prupe.6G343400	6	29555806	29561873	protein dimerization activity	GO:0046983	BHLH
6_2	RP	Prupe.6G338100	6	29315774	29319397	cysteine biosynthetic process from serine; cysteine synthase activity	GO:0004124; GO:0006535	BIFUNCTIONAL CYSTATHIONINE GAMMA-LYASE/CYSTEINE SYNTHASE-RELATED
6_2	RP	Prupe.6G338400	6	29326476	29330540	cysteine biosynthetic process from serine; cysteine synthase activity	GO:0004124; GO:0006535	BIFUNCTIONAL CYSTATHIONINE GAMMA-LYASE/CYSTEINE SYNTHASE-RELATED
6_2	RP	Prupe.6G342600	6	29522683	29524333	calcium ion binding	GO:0005509	CALCIUM BINDING PROTEIN
6_2	RP	Prupe.6G341800	6	29491147	29494271	transferase activity, transferring acyl groups other than amino-acyl groups	GO:0016747	CAT-like_dom
6_2	RP	Prupe.6G345000	6	29622123	29625810	ATP binding; protein kinase activity; protein phosphorylation; protein serine/threonine kinase activity; transferase activity, transferring phosphorus-containing groups	GO:0004672; GO:0004674; GO:0005524; GO:0006468; GO:0016772	ConA-like_dom
6_2	RP	Prupe.6G340600	6	29437408	29441666			CRC
6_2	RP	Prupe.6G341700	6	29484332	29489452	damaged DNA binding; nucleotide-excision repair; nucleus	GO:0003684; GO:0005634; GO:0006289	Cysteine proteinases
6_2	RP	Prupe.6G346500	6	29679837	29684011	zinc ion binding	GO:0008270	DBD_Tnp_Mut
6_2	RP	Prupe.6G339900	6	29396900	29398317	carbohydrate metabolic process; isomerase activity	GO:0005975; GO:0016853	D-galactose 6-phosphate degradation
6_2	RP	Prupe.6G341500	6	29478225	29479876	pentose-phosphate shunt, non-oxidative branch; ribose-5-phosphate isomerase activity	GO:0004751; GO:0009052	D-ribose-5-phosphate isomerase (RpiA), lid domain
6_2	RP	Prupe.6G337600	6	29276605	29284436	ATP binding; protein kinase activity; protein phosphorylation; protein serine/threonine kinase activity; transferase activity, transferring phosphorus-containing groups	GO:0004672; GO:0004674; GO:0005524; GO:0006468; GO:0016772	EDR1
6_2	RP	Prupe.6G339600	6	29389347	29390405	calcium ion binding	GO:0005509	EFh
6_2	RP	Prupe.6G342700	6	29526650	29529832	calcium ion binding	GO:0005509	EF-hand
6_2	RP	Prupe.6G342800	6	29531300	29535130	catalytic activity; coenzyme binding	GO:0003824; GO:0050662	Epimerase
6_2	RP	Prupe.6G345700	6	29655467	29660572	nucleic acid binding; RNA binding	GO:0003676; GO:0003723	Eukaryotic type KH-domain (KH-domain type I)
6_2	RP	Prupe.6G340200	6	29406453	29409727			ExoRNase_PH_dom1
6_2	RP	Prupe.6G346700	6	29686660	29691413			F14D16.14
6_2	RP	Prupe.6G344900	6	29619430	29620936			F22O13.28
6_2	RP	Prupe.6G345400	6	29638637	29641966			FAD/NAD(P)-binding domain
6_2	RP	Prupe.6G337700	6	29284788	29286278			Gal_Oxase/kelch_b-propeller
6_2	RP	Prupe.6G341600	6	29481071	29484297	cell redox homeostasis; glycerol ether metabolic process; protein disulfide oxidoreductase activity	GO:0006662; GO:0015035; GO:0045454	Galactose-bd-like
6_2	RP	Prupe.6G336900	6	29245170	29254560	protein binding	GO:0005515	G-protein_beta_WD-40_rep
6_2	RP	Prupe.6G346900	6	29703667	29707038			GRF1-INTERACTING FACTOR 1
6_2	RP	Prupe.6G345300	6	29637622	29638636	DNA binding; nucleosome; nucleosome assembly; nucleus	GO:0000786; GO:0003677; GO:0005634; GO:0006334	H15
6_2	RP	Prupe.6G343500	6	29562528	29565215	protein binding	GO:0005515	HCP-like
6_2	RP	Prupe.6G340100	6	29405831	29406849	DNA binding; protein binding	GO:0003677; GO:0005515	Homeodomain-like
6_2	RP	Prupe.6G341200	6	29470511	29472130	protein binding	GO:0005515	IQ
6_2	RP	Prupe.6G339500	6	29380902	29384599	ATP binding; protein kinase activity; protein phosphorylation; protein serine/threonine kinase activity; transferase activity, transferring phosphorus-containing groups	GO:0004672; GO:0004674; GO:0005524; GO:0006468; GO:0016772	Kinase-like_dom
6_2	RP	Prupe.6G341100	6	29465616	29469971	ATP binding; protein kinase activity; protein phosphorylation; protein serine/threonine kinase activity; transferase activity, transferring phosphorus-containing groups	GO:0004672; GO:0004674; GO:0005524; GO:0006468; GO:0016772	Kinase-like_dom
6_2	RP	Prupe.6G337000	6	29257559	29261562	ATP binding; kinesin complex; microtubule-based movement; microtubule binding; microtubule motor activity	GO:0003777; GO:0005524; GO:0005871; GO:0007018; GO:0008017	Kinesin
6_2	RP	Prupe.6G342400	6	29515819	29517265			LSM
6_2	RP	Prupe.6G343600	6	29565298	29574075	mediator complex; regulation of transcription from RNA polymerase II promoter; RNA polymerase II transcription cofactor activity	GO:0001104; GO:0006357; GO:0016592	Med14
6_2	RP	Prupe.6G338600	6	29355437	29356072	iron ion binding; metal ion binding	GO:0005506; GO:0046872	metal ion binding
6_2	RP	Prupe.6G337200	6	29263865	29266487			Methyltransf_26
6_2	RP	Prupe.6G343300	6	29550946	29553941	integral to membrane; membrane; plasma membrane; protein secretion; protein transport; protein transporter activity	GO:0005886; GO:0008565; GO:0009306; GO:0015031; GO:0016020; GO:0016021	MttA_Hcf106
6_2	RP	Prupe.6G341000	6	29456869	29459969	chromatin binding	GO:0003682	Myb_DNA-bind_4
6_2	RP	Prupe.6G339800	6	29393568	29396899			NTF2-like
6_2	RP	Prupe.6G344600	6	29611500	29613292	cell wall; cell wall modification; enzyme inhibitor activity; pectinesterase activity	GO:0004857; GO:0005618; GO:0030599; GO:0042545	Pectinesterase
6_2	RP	Prupe.6G346200	6	29670815	29675113			Pentatricopeptide_repeat
6_2	RP	Prupe.6G343200	6	29549319	29550761			Pentatricopeptide_repeat
6_2	RP	Prupe.6G344500	6	29608762	29610733	prefoldin complex; protein folding; unfolded protein binding	GO:0006457; GO:0016272; GO:0051082	PFD_beta-like
6_2	RP	Prupe.6G345100	6	29627457	29629571	regulation of transcription, DNA-dependent; sequence-specific DNA binding; sequence-specific DNA binding transcription factor activity	GO:0003700; GO:0006355; GO:0043565	Plant_zn_clust
6_2	RP	Prupe.6G344700	6	29612410	29614654			PRA1
6_2	RP	Prupe.6G337800	6	29287049	29289329			PRE-RRNA-PROCESSING PROTEIN TSR2 HOMOLOG
6_2	RP	Prupe.6G345500	6	29642131	29646158			PROTEIN WAVE-DAMPENED 2-RELATED
6_2	RP	Prupe.6G340900	6	29447870	29454701	pseudouridine synthase activity; pseudouridine synthesis; RNA binding; RNA modification	GO:0001522; GO:0003723; GO:0009451; GO:0009982	PsdUridine_synth_cat_dom
6_2	RP	Prupe.6G345200	6	29629665	29632935	ribosome; RNA binding; small ribosomal subunit; structural constituent of ribosome; translation	GO:0003723; GO:0003735; GO:0005840; GO:0006412; GO:0015935	Ribosomal protein S19
6_2	RP	Prupe.6G344100	6	29591727	29596057	metal ion binding; protein binding; zinc ion binding	GO:0005515; GO:0008270; GO:0046872	RING
6_2	RP	Prupe.6G337300	6	29266610	29269569			SEC-C
6_2	RP	Prupe.6G337900	6	29289481	29291370			SEED MATURATION FAMILY PROTEIN
6_2	RP	Prupe.6G340800	6	29444773	29448201	protein binding	GO:0005515	TETRATRICOPEPTIDE REPEAT PROTEIN
6_2	RP	Prupe.6G339400	6	29374648	29378971			UCP037221
8_1	RP	Prupe.8G029400	8	2701897	2705652	protein binding	GO:0005515	ANK
8_1	RP	Prupe.8G029900	8	2794259	2795190	protein binding	GO:0005515	ANK
8_1	RP	Prupe.8G029600	8	2754362	2756606			ANKYRIN REPEAT FAMILY PROTEIN-RELATED
8_1	RP	Prupe.8G029000	8	2645500	2647904	ATP binding; nucleic acid binding	GO:0003676; GO:0005524	ATP-DEPENDENT RNA HELICASE DDX23-RELATED
8_1	RP	Prupe.8G026300	8	2385234	2389313	regulation of transcription, DNA-dependent; sequence-specific DNA binding; sequence-specific DNA binding transcription factor activity	GO:0003700; GO:0006355; GO:0043565	BASIC LEUCINE ZIPPER TRANSCRIPTION FACTOR-LIKE PROTEIN-RELATED
8_1	RP	Prupe.8G028000	8	2538081	2540689	mitochondrial electron transport, ubiquinol to cytochrome c; ubiquinol-cytochrome-c reductase activity	GO:0006122; GO:0008121	Bc1_11K
8_1	RP	Prupe.8G027700	8	2520244	2521322			Ccc1_fam
8_1	RP	Prupe.8G028600	8	2587053	2588453			Clavaminate synthase-like
8_1	RP	Prupe.8G026400	8	2396029	2398289	heme binding; iron ion binding; oxidation-reduction process; oxidoreductase activity, acting on paired donors, with incorporation or reduction of molecular oxygen	GO:0005506; GO:0016705; GO:0020037; GO:0055114	Cytochrome P450
8_1	RP	Prupe.8G028900	8	2640650	2643727	integral to membrane; membrane; transmembrane transporter activity	GO:0016020; GO:0016021; GO:0022857	EamA
8_1	RP	Prupe.8G027900	8	2528361	2536997	GTPase activity; GTP binding	GO:0003924; GO:0005525	EF_GTP-bd_dom
8_1	RP	Prupe.8G028200	8	2558425	2565418			EF-hand
8_1	RP	Prupe.8G027800	8	2525552	2527389			F21B23.6 PROTEIN-RELATED
8_1	RP	Prupe.8G029200	8	2665913	2672582	protein binding	GO:0005515	F-box
8_1	RP	Prupe.8G028300	8	2566771	2570494	carbohydrate metabolic process; fructose 1,6-bisphosphate 1-phosphatase activity; phosphoric ester hydrolase activity	GO:0005975; GO:0042132; GO:0042578	FBPase
8_1	RP	Prupe.8G027500	8	2511769	2513201			L domain-like
8_1	RP	Prupe.8G027000	8	2458122	2460940	ADP binding; protein binding	GO:0005515; GO:0043531	L domain-like
8_1	RP	Prupe.8G027100	8	2472726	2476778	ADP binding; protein binding; signal transduction	GO:0005515; GO:0007165; GO:0043531	LEUCINE-RICH REPEAT-CONTAINING PROTEIN
8_1	RP	Prupe.8G027300	8	2503708	2507350	ADP binding; protein binding; signal transduction	GO:0005515; GO:0007165; GO:0043531	LEUCINE-RICH REPEAT-CONTAINING PROTEIN
8_1	RP	Prupe.8G026500	8	2404525	2410325	ADP binding; protein binding; signal transduction	GO:0005515; GO:0007165; GO:0043531	Leu-rich_rpt
8_1	RP	Prupe.8G026700	8	2425172	2430022	ADP binding; protein binding; signal transduction	GO:0005515; GO:0007165; GO:0043531	Leu-rich_rpt
8_1	RP	Prupe.8G026800	8	2442901	2447718	ADP binding; protein binding; signal transduction	GO:0005515; GO:0007165; GO:0043531	Leu-rich_rpt
8_1	RP	Prupe.8G028400	8	2570992	2573231			LSM
8_1	RP	Prupe.8G028500	8	2578779	2580342			Myb_DNA-bind_4
8_1	RP	Prupe.8G028800	8	2613603	2616784	chromatin binding	GO:0003682	Myb_DNA-bind_4
8_1	RP	Prupe.8G028700	8	2596373	2599746	chromatin binding; DNA binding	GO:0003677; GO:0003682	MYB_LIKE
8_1	RP	Prupe.8G026600	8	2410670	2412126	mRNA processing; THO complex part of transcription export complex	GO:0000445; GO:0006397	NIF3L1BP1 PROTEIN-RELATED
8_1	RP	Prupe.8G026900	8	2448184	2448973	mRNA processing; THO complex part of transcription export complex	GO:0000445; GO:0006397	NIF3L1BP1 PROTEIN-RELATED
8_1	RP	Prupe.8G027400	8	2508622	2510537	mRNA processing; THO complex part of transcription export complex	GO:0000445; GO:0006397	NIF3L1BP1 PROTEIN-RELATED
8_1	RP	Prupe.8G027200	8	2477956	2478699	mRNA processing; THO complex part of transcription export complex	GO:0000445; GO:0006397	NIF3L1BP1 PROTEIN-RELATED
8_1	RP	Prupe.8G026200	8	2377847	2380776	protein binding	GO:0005515	Pentatricopeptide_repeat
8_1	RP	Prupe.8G028100	8	2541499	2544942			PORR
8_1	RP	Prupe.8G029800	8	2765737	2766830			PP2
8_1	RP	Prupe.8G030000	8	2798164	2799203			PP2
8_1	RP	Prupe.8G030100	8	2807215	2809814			PP2
8_1	RP	Prupe.8G030200	8	2819764	2821175			PP2

## Sheet: S8_Table
Table S8. Gene Ontology (GO) enrichment for the candidate genes detected in the genomic regions encompassing the QTNs identified using the mrMLM 4.0 methods and FarmCPU.
Category	over_represented_pvalue	under_represented_pvalue	numDEInCat	numInCat	term	ontology	over_represented_FDR	go_term	gene_ids
GO:0000445	1.88986e-07	1	4	4	THO complex part of transcription export complex	CC	0.00035586	CC THO complex part of transcription export complex	Prupe.8G027400, Prupe.8G027200, Prupe.8G026900, Prupe.8G026600
GO:0004525	2.60933e-06	1	6	19	ribonuclease III activity	MF	0.00245668	MF ribonuclease III activity	Prupe.4G219700, Prupe.4G219600, Prupe.4G219500, Prupe.4G219400, Prupe.4G219300, Prupe.4G219200
GO:0008146	1.00914e-05	1	4	8	sulfotransferase activity	MF	0.00633405	MF sulfotransferase activity	Prupe.5G209600, Prupe.5G209500, Prupe.5G209100, Prupe.5G209000
GO:0010215	0.000108118	0.999996	4	12	cellulose microfibril organization	BP	0.0339311	BP cellulose microfibril organization	Prupe.5G208100, Prupe.5G208000, Prupe.5G207900, Prupe.5G207800
GO:0016049	0.000108118	0.999996	4	12	cell growth	BP	0.0339311	BP cell growth	Prupe.5G208100, Prupe.5G208000, Prupe.5G207900, Prupe.5G207800
GO:0031225	0.000108118	0.999996	4	12	anchored component of membrane	CC	0.0339311	CC anchored component of membrane	Prupe.5G208100, Prupe.5G208000, Prupe.5G207900, Prupe.5G207800
GO:0004751	0.00143375	0.999989	2	3	ribose-5-phosphate isomerase activity	MF	0.337469	MF ribose-5-phosphate isomerase activity	Prupe.6G341500, Prupe.1G322200
GO:0009052	0.00143375	0.999989	2	3	pentose-phosphate shunt, non-oxidative branch	BP	0.337469	BP pentose-phosphate shunt, non-oxidative branch	Prupe.6G341500, Prupe.1G322200
GO:0016763	0.00162485	0.999987	2	3	transferase activity, transferring pentosyl groups	MF	0.339955	MF transferase activity, transferring pentosyl groups	Prupe.4G217200, Prupe.4G217200, Prupe.1G323900
GO:0003723	0.00181873	0.999368	14	255	RNA binding	MF	0.342467	MF RNA binding	Prupe.6G345700, Prupe.6G345200, Prupe.6G340900, Prupe.5G003200, Prupe.4G219700, Prupe.4G219600, Prupe.4G219500, Prupe.4G219400, Prupe.4G219300, Prupe.4G219200, Prupe.4G218000, Prupe.4G182400, Prupe.4G182300, Prupe.4G180500
GO:0042578	0.00221577	0.999886	3	12	phosphoric ester hydrolase activity	MF	0.365249	MF phosphoric ester hydrolase activity	Prupe.8G028300, Prupe.8G028300, Prupe.1G560800, Prupe.1G552900, Prupe.1G552900
GO:0006122	0.00232766	0.999964	2	5	mitochondrial electron transport, ubiquinol to cytochrome c	BP	0.365249	BP mitochondrial electron transport, ubiquinol to cytochrome c	Prupe.8G028000, Prupe.1G560700
GO:0006396	0.00342215	0.999248	7	86	RNA processing	BP	0.495685	BP RNA processing	Prupe.4G219700, Prupe.4G219600, Prupe.4G219500, Prupe.4G219400, Prupe.4G219300, Prupe.4G219200, Prupe.4G218000
GO:0005783	0.00439938	0.999487	4	31	endoplasmic reticulum	CC	0.561437	CC endoplasmic reticulum	Prupe.5G020200, Prupe.5G006900, Prupe.4G217500, Prupe.4G180600
GO:0006397	0.00447241	0.999478	4	30	mRNA processing	BP	0.561437	BP mRNA processing	Prupe.8G027400, Prupe.8G027200, Prupe.8G026900, Prupe.8G026600
GO:0008121	0.00637234	0.999809	2	7	ubiquinol-cytochrome-c reductase activity	MF	0.748997	MF ubiquinol-cytochrome-c reductase activity	Prupe.8G028000, Prupe.1G560700
GO:0042132	0.00676206	0.999802	2	6	fructose 1,6-bisphosphate 1-phosphatase activity	MF	0.748997	MF fructose 1,6-bisphosphate 1-phosphatase activity	Prupe.8G028300, Prupe.1G560800
GO:0004124	0.00733721	0.999775	2	6	cysteine synthase activity	MF	0.767554	MF cysteine synthase activity	Prupe.6G338400, Prupe.6G338100
GO:0016706	0.00839622	0.997332	9	158	2-oxoglutarate-dependent dioxygenase activity	MF	0.83211	MF 2-oxoglutarate-dependent dioxygenase activity	Prupe.4G263000, Prupe.4G262900, Prupe.4G262800, Prupe.4G248600, Prupe.4G248400, Prupe.4G248300, Prupe.4G248200, Prupe.4G248100, Prupe.1G319300
GO:0004650	0.0103361	0.997538	6	87	polygalacturonase activity	MF	0.967005	MF polygalacturonase activity	Prupe.6G155200, Prupe.4G262200, Prupe.4G261900, Prupe.4G261800, Prupe.4G261700, Prupe.4G218900
GO:0000786	0.0113387	0.998212	4	50	nucleosome	CC	0.967005	CC nucleosome	Prupe.6G345300, Prupe.6G345300, Prupe.4G234500, Prupe.4G200700, Prupe.1G325800
GO:0004190	0.013131	0.996709	6	86	aspartic-type endopeptidase activity	MF	0.967005	MF aspartic-type endopeptidase activity	Prupe.6G346400, Prupe.6G346300, Prupe.6G344400, Prupe.6G344300, Prupe.6G344200, Prupe.4G217700
GO:0006855	0.0133893	0.997171	5	62	drug transmembrane transport	BP	0.967005	BP drug transmembrane transport	Prupe.4G248800, Prupe.1G320500, Prupe.1G320400, Prupe.1G320300, Prupe.1G320200
GO:0015297	0.0133893	0.997171	5	62	antiporter activity	MF	0.967005	MF antiporter activity	Prupe.4G248800, Prupe.1G320500, Prupe.1G320400, Prupe.1G320300, Prupe.1G320200
GO:0006457	0.0169582	0.9949	7	122	protein folding	BP	0.967005	BP protein folding	Prupe.6G344500, Prupe.6G344500, Prupe.6G154400, Prupe.5G007000, Prupe.4G223200, Prupe.4G223200, Prupe.4G223000, Prupe.4G223000, Prupe.2G310000, Prupe.1G326400
GO:0030001	0.0170787	0.99544	6	103	metal ion transport	BP	0.967005	BP metal ion transport	Prupe.5G005800, Prupe.4G234800, Prupe.4G231200, Prupe.1G549900, Prupe.1G323100, Prupe.1G323000
GO:0004867	0.017259	0.998999	2	14	serine-type endopeptidase inhibitor activity	MF	0.967005	MF serine-type endopeptidase inhibitor activity	Prupe.1G552700, Prupe.1G552600
GO:0005758	0.0180457	1	1	1	mitochondrial intermembrane space	CC	0.967005	CC mitochondrial intermembrane space	Prupe.4G181400
GO:0016531	0.0180457	1	1	1	copper chaperone activity	MF	0.967005	MF copper chaperone activity	Prupe.4G181400
GO:0006662	0.0215186	0.997146	3	31	glycerol ether metabolic process	BP	0.967005	BP glycerol ether metabolic process	Prupe.6G341600, Prupe.4G234300, Prupe.4G183200
GO:0004170	0.0225943	1	1	1	dUTP diphosphatase activity	MF	0.967005	MF dUTP diphosphatase activity	Prupe.1G380600
GO:0046080	0.0225943	1	1	1	dUTP metabolic process	BP	0.967005	BP dUTP metabolic process	Prupe.1G380600, Prupe.1G380600
GO:0002143	0.0226188	1	1	1	tRNA wobble position uridine thiolation	BP	0.967005	BP tRNA wobble position uridine thiolation	Prupe.4G221100
GO:0016480	0.0228741	1	1	1	negative regulation of transcription by RNA polymerase III	BP	0.967005	BP negative regulation of transcription by RNA polymerase III	Prupe.1G321700
GO:0004070	0.0233158	1	1	1	aspartate carbamoyltransferase activity	MF	0.967005	MF aspartate carbamoyltransferase activity	Prupe.4G221200
GO:0019363	0.0233808	1	1	1	pyridine nucleotide biosynthetic process	BP	0.967005	BP pyridine nucleotide biosynthetic process	Prupe.1G323900
GO:0010155	0.023513	1	1	1	regulation of proton transport	BP	0.967005	BP regulation of proton transport	Prupe.4G180600
GO:0000107	0.0235143	1	1	1	imidazoleglycerol-phosphate synthase activity	MF	0.967005	MF imidazoleglycerol-phosphate synthase activity	Prupe.4G217200, Prupe.4G217200
GO:0016719	0.023518	1	1	1	carotene 7,8-desaturase activity	MF	0.967005	MF carotene 7,8-desaturase activity	Prupe.6G340000
GO:0019206	0.0235222	1	1	1	nucleoside kinase activity	MF	0.967005	MF nucleoside kinase activity	Prupe.1G551200
GO:0004638	0.0235934	1	1	1	phosphoribosylaminoimidazole carboxylase activity	MF	0.967005	MF phosphoribosylaminoimidazole carboxylase activity	Prupe.6G346800, Prupe.6G346800
GO:0032324	0.0236409	1	1	1	molybdopterin cofactor biosynthetic process	BP	0.967005	BP molybdopterin cofactor biosynthetic process	Prupe.6G153900
GO:0006659	0.023694	1	1	1	phosphatidylserine biosynthetic process	BP	0.967005	BP phosphatidylserine biosynthetic process	Prupe.1G319700
GO:0006535	0.0241366	0.998383	2	11	cysteine biosynthetic process from serine	BP	0.967005	BP cysteine biosynthetic process from serine	Prupe.6G338400, Prupe.6G338400, Prupe.6G338100, Prupe.6G338100
GO:0047262	0.0362124	0.996906	2	13	polygalacturonate 4-alpha-galacturonosyltransferase activity	MF	1	MF polygalacturonate 4-alpha-galacturonosyltransferase activity	Prupe.5G209400, Prupe.5G208900
GO:0000275	0.0375103	0.999642	1	2	mitochondrial proton-transporting ATP synthase complex, catalytic sector F(1)	CC	1	CC mitochondrial proton-transporting ATP synthase complex, catalytic sector F(1)	Prupe.1G320700
GO:0006825	0.0396177	0.9996	1	2	copper ion transport	BP	1	BP copper ion transport	Prupe.4G181400
GO:0003777	0.0397397	0.990805	4	55	microtubule motor activity	MF	1	MF microtubule motor activity	Prupe.6G337000, Prupe.6G337000, Prupe.4G231600, Prupe.4G231600, Prupe.4G201200, Prupe.4G201200, Prupe.4G201200, Prupe.4G184200, Prupe.4G184200
GO:0005871	0.0397397	0.990805	4	55	kinesin complex	CC	1	CC kinesin complex	Prupe.6G337000, Prupe.4G231600, Prupe.4G201200, Prupe.4G184200
GO:0007018	0.0397397	0.990805	4	55	microtubule-based movement	BP	1	BP microtubule-based movement	Prupe.6G337000, Prupe.6G337000, Prupe.4G231600, Prupe.4G231600, Prupe.4G201200, Prupe.4G201200, Prupe.4G201200, Prupe.4G184200, Prupe.4G184200
GO:0009306	0.0410551	0.999571	1	2	protein secretion	BP	1	BP protein secretion	Prupe.6G343300, Prupe.6G343300
GO:0034220	0.0412583	0.999566	1	2	ion transmembrane transport	BP	1	BP ion transmembrane transport	Prupe.5G006500
GO:0008690	0.0416535	0.999558	1	2	3-deoxy-manno-octulosonate cytidylyltransferase activity	MF	1	MF 3-deoxy-manno-octulosonate cytidylyltransferase activity	Prupe.4G183000
GO:0009103	0.0416535	0.999558	1	2	lipopolysaccharide biosynthetic process	BP	1	BP lipopolysaccharide biosynthetic process	Prupe.4G183000, Prupe.4G183000
GO:0006333	0.0427528	0.999534	1	2	chromatin assembly or disassembly	BP	1	BP chromatin assembly or disassembly	Prupe.1G320600
GO:0005730	0.0428845	0.995912	2	15	nucleolus	CC	1	CC nucleolus	Prupe.5G003200, Prupe.4G184700
GO:0080048	0.0449128	0.999485	1	2	GDP-D-glucose phosphorylase activity	MF	1	MF GDP-D-glucose phosphorylase activity	Prupe.4G220800
GO:0045550	0.0449828	0.999483	1	2	geranylgeranyl reductase activity	MF	1	MF geranylgeranyl reductase activity	Prupe.6G153000, Prupe.6G153000
GO:0004792	0.0452006	0.999478	1	2	thiosulfate sulfurtransferase activity	MF	1	MF thiosulfate sulfurtransferase activity	Prupe.4G221100
GO:0006784	0.0455819	0.999469	1	2	heme A biosynthetic process	BP	1	BP heme A biosynthetic process	Prupe.4G230100, Prupe.4G230100
GO:0032783	0.0456438	0.999468	1	2	super elongation complex	CC	1	CC super elongation complex	Prupe.1G322700
GO:0016972	0.0458717	0.999462	1	2	thiol oxidase activity	MF	1	MF thiol oxidase activity	Prupe.1G321800
GO:0016743	0.0461786	0.999455	1	2	carboxyl- or carbamoyltransferase activity	MF	1	MF carboxyl- or carbamoyltransferase activity	Prupe.4G221200, Prupe.4G221200
GO:0004514	0.0463725	0.999451	1	2	nicotinate-nucleotide diphosphorylase (carboxylating) activity	MF	1	MF nicotinate-nucleotide diphosphorylase (carboxylating) activity	Prupe.1G323900, Prupe.1G323900
GO:0004609	0.0465336	0.999447	1	2	phosphatidylserine decarboxylase activity	MF	1	MF phosphatidylserine decarboxylase activity	Prupe.1G560600
GO:0009067	0.0469299	0.999437	1	2	aspartate family amino acid biosynthetic process	BP	1	BP aspartate family amino acid biosynthetic process	Prupe.5G007500
GO:0005509	0.04918	0.978761	9	227	calcium ion binding	MF	1	MF calcium ion binding	Prupe.6G342700, Prupe.6G342600, Prupe.6G339600, Prupe.6G152600, Prupe.5G005500, Prupe.4G222700, Prupe.4G201300, Prupe.2G310300, Prupe.1G560600
GO:0005840	0.0493813	0.97753	10	291	ribosome	CC	1	CC ribosome	Prupe.6G345200, Prupe.6G340700, Prupe.6G339300, Prupe.5G019600, Prupe.4G231400, Prupe.4G230200, Prupe.4G220900, Prupe.4G200400, Prupe.3G148400, Prupe.1G551700
